# Supplementary material for: The crystalline sponge method: quantum chemical in silico derivation and analysis of guest binding energies
Source: Royal Society of Chemistry journal article supplement (doi:10.1039/d1ce00997d), 2021-01-01
Supplement: d1ce00997d1.pdf [file d1ce00997d1.pdf]

Supporting Information

**The Crystalline Sponge Method: Quantum Chemical *In Silico*  
Derivation and Analysis of Guest Binding Energies**

Ashley D. Cardenal and Timothy R. Ramadhar\*

Department of Chemistry, Howard University, Washington, District of Columbia, 20059,  
United States of America

E-mail: [timothy.ramadhar@howard.edu](mailto:timothy.ramadhar@howard.edu)

## Table of Contents

|                                                                                                                                                                                                                                |     |
|--------------------------------------------------------------------------------------------------------------------------------------------------------------------------------------------------------------------------------|-----|
| <b>Computational Details</b> .....                                                                                                                                                                                             | S3  |
| <b>Computational Data</b> .....                                                                                                                                                                                                | S5  |
| <b>Table S1.</b> Primitive unit cell parameters of geometry-optimised structures.....                                                                                                                                          | S5  |
| <b>Table S2.</b> Real and reciprocal lattice matrices of geometry-optimised structures.....                                                                                                                                    | S5  |
| <b>Table S3.</b> Dispersion-corrected SPE values.....                                                                                                                                                                          | S6  |
| <b>Table S4.</b> Fractional atomic coordinates of the optimised structure of <i>trans</i> -anethole@ <b>1a</b> .....                                                                                                           | S7  |
| <b>Table S5.</b> Fractional atomic coordinates of the optimised structure of (+)-artemisinin@ <b>1a</b> .....                                                                                                                  | S21 |
| <b>Table S6.</b> Fractional atomic coordinates of the optimised structure of 4-(trifluoromethyl)phenyl azide@ <b>1a</b> .....                                                                                                  | S31 |
| <b>Table S7.</b> Fractional atomic coordinates of the optimised structure of vanillin@ <b>1a</b> .....                                                                                                                         | S42 |
| <b>Table S8.</b> Fractional atomic coordinates of the optimised structure of (1 <i>R</i> )-(-)-menthyl acetate@ <b>1b</b> .....                                                                                                | S53 |
| <b>Table S9.</b> Fractional atomic coordinates of the optimised structure of (1 <i>R</i> )-(-)-menthyl acetate@ <b>1c</b> .....                                                                                                | S64 |
| <b>Table S10.</b> Fractional atomic coordinates of the optimised structure of chloroform@ <b>1a</b> .....                                                                                                                      | S75 |
| <b>Additional Figures</b> .....                                                                                                                                                                                                | S84 |
| <b>Figure S1.</b> Overlay of the experimental (blue) and computationally geometry optimised (red) structures of (+)-artemisinin@ <b>1a</b> .....                                                                               | S84 |
| <b>Figure S2.</b> Overlay of the experimental (blue) and computationally geometry optimised (red) structures of 4-(trifluoromethyl)phenyl azide@ <b>1a</b> .....                                                               | S84 |
| <b>Figure S3.</b> Overlay of the experimental (blue) and computationally geometry optimised (red) structures of vanillin@ <b>1a</b> .....                                                                                      | S85 |
| <b>Figure S4.</b> Overlay of the experimental (blue) and computationally geometry optimised (red) structures of (1 <i>R</i> )-(-)-menthyl acetate@ <b>1b</b> .....                                                             | S86 |
| <b>Figure S5.</b> Overlay of the experimental (blue) and computationally geometry optimised (red) structures of (1 <i>R</i> )-(-)-menthyl acetate@ <b>1c</b> .....                                                             | S86 |
| <b>Figure S6.</b> Overlay of the experimental (blue) and computationally geometry optimised (red) structures of chloroform@ <b>1a</b> .....                                                                                    | S87 |
| <b>Figure S7.</b> Experimental crystallographic packing model illustrating possible contacts (in Å) forged by <b>A</b> (centre) in <i>trans</i> -anethole@ <b>1a</b> .....                                                     | S88 |
| <b>Figure S8.</b> Experimental crystallographic packing models illustrating possible contacts (in Å) forged by (a) <b>E</b> in (+)-artemisinin@ <b>1a</b> and (b) <b>G</b> in 4-(trifluoromethyl)phenyl azide@ <b>1a</b> ..... | S89 |
| <b>Figure S9.</b> Experimental crystallographic packing model illustrating possible contacts (in Å) forged by <b>H</b> in vanillin@ <b>1a</b> .....                                                                            | S90 |
| <b>Figure S10.</b> Experimental crystallographic packing model illustrating possible contacts (in Å) forged by <b>K</b> (centre) in vanillin@ <b>1a</b> .....                                                                  | S91 |
| <b>Figure S11.</b> Experimental crystallographic packing models illustrating possible contacts (in Å) in (1 <i>R</i> )-(-)-menthyl acetate@ <b>1b</b> forged by (a) <b>N</b> and (b) <b>O</b> .....                            | S92 |
| <b>Figure S12.</b> Experimental crystallographic packing model illustrating possible contacts (in Å) forged by <b>R</b> in (1 <i>R</i> )-(-)-menthyl acetate@ <b>1c</b> .....                                                  | S93 |
| <b>References</b> .....                                                                                                                                                                                                        | S94 |

## Computational Details

Crystal structure data were downloaded free of charge as a CIF from The Cambridge Crystallographic Data Centre (CCDC) website (<https://www.ccdc.cam.ac.uk/>). Structures were simplified for calculations by deleting the lowest-occupancy atom(s) in each disordered pair/triplet in Olex2 to eliminate positional disorder.<sup>1</sup> The resulting structures were subsequently written as a CIF with Olex2 for use as input.

Gas-phase geometry-optimisation and single-point energy (SPE) calculations were performed using the Cambridge Serial Total Energy Package (CASTEP) in the BIOVIA Materials Studio 2019 suite.<sup>2</sup> For calculations, all target and solvent molecules were included and assumed to be at full occupancy. Calculations were performed using DFT-D2 as implemented by Grimme<sup>3</sup> with a PBE GGA functional.<sup>4</sup> A plane-wave basis set with tabulated ultrasoft pseudopotentials,<sup>5,6</sup> and a Pulay density-mixing scheme were employed for all calculations.<sup>7</sup> Geometry optimisations utilized a variant of the BFGS quasi-Newton minimiser.<sup>8</sup> Prior to execution of geometry optimisation calculations, unit cells were reduced to primitive unit cells where symmetry was reduced to triclinic *P*1. Geometry optimisations were performed in two rounds, with the first using CASTEP “express” settings followed by a round using tighter convergence criteria. Unit cell parameters were not optimized, and no other geometric constraints were applied for any geometry optimization calculations. Round one of the geometry optimisation was performed with a plane-wave basis set energy cut-off of 300 eV using a standard FFT grid (grid size: 1.5, maximum g-vector size: 13.3104 1/Å) and utilising the following convergence tolerances: energy of 0.001 eV/cell, maximum force of 100.0 eV/Å, maximum stress of 100.0 GPa, and maximum displacement of 100.0 Å for a maximum of 200 iterations. Electronically, the first round of calculations were run with a medium energy cutoff, an SCF tolerance of  $1.0 \times 10^{-4}$  eV/cell over a maximum of 100 SCF cycles with a convergence window of 2 and a coarse k-point set (1 x 1 x 1). Typically, first round jobs could be completed via running parallel on 40 cores. Round two of the geometry optimisation was performed with a plane-wave basis set energy cut-off of 340 eV using a standard FFT grid (grid size: 1.5, maximum g-vector size: 14.1700 1/Å) and utilising the following convergence tolerances: energy of  $1.0 \times 10^{-5}$  eV/atom, maximum force of 0.05 eV/Å, maximum stress of 0.1 GPa, and maximum displacement of 0.002 Å for a maximum of 200 iterations. Electronically, the second round of calculations was run with a fine energy cutoff, an SCF tolerance of  $1.0 \times 10^{-6}$  eV/atom over a maximum of 100 SCF cycles with a convergence window of 3 and a medium k-point set (1 x 1 x 1). Typically, second round jobs could be completed via running parallel on 55–100 cores. The final geometry optimised structure was utilized for SPE calculations, which were performed using the same criteria as in the second round of geometry optimisations. In order to obtain the SPE for the guest alone, the framework and all ancillary guests were deleted, leaving only the guest of interest. The SPE calculation was then performed on this new structure file containing only the guest of interest. The inverse was then completed to obtain the SPE for the host and ancillary guests (i.e., the guest of interest was deleted) and the SPE calculation was performed on the new structure file without the guest.

For asymmetric unit comparison (computed versus experiment), the geometry optimised structure file (.xsd) was exported as a CIF through Materials Studio. The geometry optimised structure was then compared to the experimental structure (without hydrogens and disordered atoms) and RMSD values were generated via a Structure Overlay calculation performed in Mercury.<sup>9</sup>

Averaged non-H *B*-factors for each guest were calculated by averaging the  $U_{eq}$  values obtained from the respective CIFs. All standard uncertainties were also appropriately averaged by summing the squares of all individual standard uncertainties followed by taking the square root of the resulting value and subsequently dividing by the quantity of values averaged. The averaged  $U_{eq}$  values with standard uncertainties were then scaled to averaged *B*-factor values by multiplying by  $8\pi^2$ .

Hirshfeld surfaces for Figures 2 and 3 were constructed using *CrystalExplorer 17.5* (revision: f4e298a, build: 2017-05-01 03:35).<sup>10,11</sup> Default settings within the program were used to generate and visualize the Hirshfeld surfaces in high resolution.

All calculations were performed using computing resources maintained by Pfizer's High Performance Computing facility. CASTEP jobs were specifically executed on the Delta cluster. Delta's computational resources are scheduled and managed with Slurm. Application environments are accessed with Lmod. Remote access is provided with SSH and NICE when GPU accelerated graphical environments are required. All nodes run Red Hat Enterprise Linux 7. CPU nodes feature 2 x Intel® Xeon® Gold 6148 CPUs @ 2.40GHz and 192 GB of memory. GPU nodes feature 2 x Intel® Xeon® Gold 6140 CPUs @ 2.30GHz, 4 x Nvidia V100, and 384 GB memory. All nodes are connected by non-blocking EDR Infiniband.

## Computational Data

**Table S1.** Primitive unit cell parameters of geometry-optimised structures

| Target@host                          | <i>a</i> (Å) | <i>b</i> (Å) | <i>c</i> (Å) | <i>a</i> (°) | <i>β</i> (°) | <i>γ</i> (°) | Volume (Å <sup>3</sup> ) |
|--------------------------------------|--------------|--------------|--------------|--------------|--------------|--------------|--------------------------|
| <i>trans</i> -anethole@1a            | 18.762201    | 18.762201    | 32.550200    | 102.260188   | 102.260188   | 47.503908    | 8217.977160              |
| (+)-artemisinin@1a                   | 19.128243    | 19.128243    | 35.233000    | 106.650483   | 106.650483   | 45.717697    | 8771.526472              |
| 4-(trifluoromethyl)phenyl azide@1a   | 19.150577    | 19.150577    | 30.941500    | 100.885704   | 100.885704   | 45.732789    | 7953.442709              |
| vanillin@1a                          | 14.922300    | 18.907800    | 32.591000    | 102.728100   | 91.7744000   | 110.79630    | 8324.809739              |
| (1 <i>R</i> )-(-)-menthyl acetate@1b | 18.482509    | 18.482509    | 33.787000    | 103.698739   | 103.698739   | 46.493204    | 8088.315649              |
| (1 <i>R</i> )-(-)-menthyl acetate@1c | 18.181356    | 18.181356    | 33.897000    | 103.997709   | 103.997709   | 46.649388    | 7860.186160              |
| chloroform@1a                        | 18.827922    | 18.827922    | 31.081000    | 100.142208   | 100.142208   | 46.057496    | 7786.729747              |

**Table S2.** Real and reciprocal lattice matrices of geometry-optimised structures

| Target@host                          | Real Lattice (Å) |            |            | Reciprocal Lattice (1/Å) |              |             |
|--------------------------------------|------------------|------------|------------|--------------------------|--------------|-------------|
| <i>trans</i> -anethole@1a            | 16.7044375       | -7.5569999 | -3.9841801 | 0.188069347              | -0.415719555 | 0.000000000 |
|                                      | 16.7044375       | 7.5569999  | -3.9841801 | 0.188069347              | 0.415719555  | 0.000000000 |
|                                      | 0.0000000        | 0.0000000  | 32.5501998 | 0.046039788              | -0.000000000 | 0.193030622 |
| (+)artemisinin@1a                    | 16.7521934       | -7.4306000 | -5.4808657 | 0.187533213              | -0.422791250 | 0.000000000 |
|                                      | 16.7521934       | 7.4306000  | -5.4808657 | 0.187533213              | 0.422791250  | 0.000000000 |
|                                      | 0.0000000        | 0.0000000  | 35.2329999 | 0.058345549              | -0.000000000 | 0.178332397 |
| 4-(trifluoromethyl)phenyl azide@1a   | 17.2709999       | -7.4415999 | -3.6165947 | 0.181899871              | -0.422166292 | 0.000000000 |
|                                      | 17.2709999       | 7.4415999  | -3.6165947 | 0.181899871              | 0.422166292  | 0.000000000 |
|                                      | 0.0000000        | 0.0000000  | 30.9414998 | 0.042522703              | 0.000000000  | 0.203066605 |
| vanillin@1a                          | 13.8497214       | -5.5359513 | -0.4620567 | 0.453668716              | 0.000000000  | 0.000000000 |
|                                      | 0.0000000        | 18.4431711 | -4.1658538 | 0.136174409              | 0.340678144  | 0.000000000 |
|                                      | 0.0000000        | 0.0000000  | 32.5909999 | 0.023837972              | 0.043546235  | 0.192788970 |
| (1 <i>R</i> )-(-)-menthyl acetate@1b | 16.4082439       | -7.2948499 | -4.3769682 | 0.191464282              | -0.430658982 | 0.000000000 |
|                                      | 16.4082439       | 7.2948499  | -4.3769682 | 0.191464282              | 0.430658982  | 0.000000000 |
|                                      | 0.0000000        | 0.0000000  | 33.7869998 | 0.049606836              | 0.000000000  | 0.185964583 |
| (1 <i>R</i> )-(-)-menthyl acetate@1c | 16.1058809       | -7.1987500 | -4.3977627 | 0.195058728              | -0.436408080 | 0.000000000 |
|                                      | 16.1058809       | 7.1987500  | -4.3977627 | 0.195058728              | 0.436408080  | 0.000000000 |
|                                      | 0.0000000        | 0.0000000  | 33.8969999 | 0.050613447              | 0.000000000  | 0.185361104 |
| chloroform@1a                        | 17.0073536       | -7.3653499 | -3.3154452 | 0.184719665              | -0.426536781 | 0.000000000 |
|                                      | 17.0073536       | 7.3653499  | -3.3154452 | 0.184719665              | 0.426536781  | 0.000000000 |
|                                      | 0.0000000        | 0.0000000  | 31.0809998 | 0.039408509              | 0.000000000  | 0.202155187 |

**Table S3.** Dispersion-corrected SPE values

| Target@host                        | $E_{\text{system}}$ (eV) | Specific Molecule + Identifying Atom <sup>a</sup> | $E_{\text{guest}}$ (eV) | $E_{\text{framework + ancillary guests}}$ (eV) |
|------------------------------------|--------------------------|---------------------------------------------------|-------------------------|------------------------------------------------|
| <i>trans</i> -anethole@1a          | -91096.06450515          | oxygen O1 (A)                                     | -8716.202254073         | -82374.15873094                                |
|                                    |                          | oxygen O2 (B)                                     | -8716.002781276         | -82374.72804829                                |
|                                    |                          | oxygen O3 (C)                                     | -8715.860473120         | -82375.98385724                                |
| (+) -artemisinin@1a                | -77473.07655431          | artemisinin (D)                                   | -9721.315513490         | -67749.49205686                                |
|                                    |                          | methyl <i>tert</i> -butyl ether (E)               | -2810.908247633         | -74660.84723345                                |
| 4-(trifluoromethyl)phenyl azide@1a | -86349.34822945          | 4-(trifluoromethyl)phenyl azide (F)               | -15784.58242957         | -70560.81645002                                |
|                                    |                          | methyl <i>tert</i> -butyl ether (G)               | -5621.632844729         | -80724.60418295                                |
| vanillin@1a                        | -86361.82127863          | vanillin C73 (H)                                  | -5354.133358011         | -81004.32635454                                |
|                                    |                          | vanillin C81 (I)                                  | -5354.478877421         | -81005.21417489                                |
|                                    |                          | vanillin C89 (J)                                  | -5354.480315080         | -81005.89707043                                |
|                                    |                          | vanillin C97 (K)                                  | -5354.421015291         | -81004.54463821                                |
| (1R)-(-)-menthyl acetate@1b        | -84148.39120818          | menthyl acetate O1 (L)                            | -6179.023415139         | -77966.34283358                                |
|                                    |                          | menthyl acetate O3 (M)                            | -6178.978349088         | -77966.35628883                                |
|                                    |                          | chloroform C97 (N)                                | -2791.612621387         | -81355.59556125                                |
|                                    |                          | chloroform C98 (O)                                | -2791.597330020         | -81356.11769262                                |
| (1R)-(-)-menthyl acetate@1c        | -82378.89997767          | menthyl acetate O1 (P)                            | -6178.840997281         | -76197.16148950                                |
|                                    |                          | menthyl acetate O3 (Q)                            | -6178.871931031         | -76197.15129303                                |
|                                    |                          | chloroform C109 (R)                               | -2791.595050487         | -79586.07000691                                |
| chloroform@1a                      | -81691.98068097          | chloroform C37 (S)                                | -5583.400829553         | -76106.50148923                                |
|                                    |                          | chloroform C38 (T)                                | -5583.279469098         | -76106.94577670                                |
|                                    |                          | chloroform C39 (U)                                | -5583.285362603         | -76106.46338912                                |

<sup>a</sup> Based on atom labels in the CIF

**Table S4.** Fractional atomic coordinates of the optimised structure of *trans*-anethole@**1a**

| x | Element | Atom   | Fractional coordinates of atoms |          |          | x |
|---|---------|--------|---------------------------------|----------|----------|---|
| x |         | Number | u                               | v        | w        | x |
| x | -----x  |        |                                 |          |          |   |
| x | H       | 1      | -0.020399                       | 1.035709 | 0.562237 | x |
| x | H       | 2      | -0.154464                       | 1.159725 | 0.512755 | x |
| x | H       | 3      | 0.040956                        | 1.188376 | 0.486545 | x |
| x | H       | 4      | 0.168128                        | 1.060813 | 0.535783 | x |
| x | H       | 5      | -0.078949                       | 1.483107 | 0.385877 | x |
| x | H       | 6      | -0.088038                       | 1.401174 | 0.433832 | x |
| x | H       | 7      | -0.288406                       | 1.405327 | 0.338337 | x |
| x | H       | 8      | -0.264458                       | 1.478363 | 0.292127 | x |
| x | H       | 9      | -0.620707                       | 1.494919 | 0.384636 | x |
| x | H       | 10     | -0.459568                       | 1.448605 | 0.383406 | x |
| x | H       | 11     | -0.370340                       | 1.334073 | 0.503092 | x |
| x | H       | 12     | -0.535801                       | 1.389496 | 0.501041 | x |
| x | H       | 13     | -0.555722                       | 1.268198 | 0.418356 | x |
| x | H       | 14     | -0.520518                       | 1.130494 | 0.366800 | x |
| x | H       | 15     | -0.808336                       | 1.336812 | 0.305211 | x |
| x | H       | 16     | -0.827157                       | 1.467637 | 0.355482 | x |
| x | H       | 17     | -0.991712                       | 1.296547 | 0.160386 | x |
| x | H       | 18     | -0.870472                       | 1.269162 | 0.221153 | x |
| x | H       | 19     | -0.715180                       | 0.962633 | 0.196313 | x |
| x | H       | 20     | -0.844843                       | 1.002295 | 0.138307 | x |
| x | H       | 21     | -0.340497                       | 0.654335 | 0.233793 | x |
| x | H       | 22     | -0.500607                       | 0.825544 | 0.227915 | x |
| x | H       | 23     | -0.417574                       | 0.905344 | 0.350360 | x |
| x | H       | 24     | -0.261925                       | 0.732856 | 0.351974 | x |
| x | H       | 25     | 0.620974                        | 0.867626 | 0.519940 | x |
| x | H       | 26     | 0.582236                        | 0.841263 | 0.555270 | x |
| x | H       | 27     | 0.652659                        | 0.875721 | 0.574348 | x |
| x | H       | 28     | 0.509289                        | 1.044109 | 0.547612 | x |
| x | H       | 29     | 0.412237                        | 0.976254 | 0.568607 | x |
| x | H       | 30     | 0.247032                        | 1.094695 | 0.578773 | x |
| x | H       | 31     | 0.085765                        | 1.260905 | 0.573955 | x |
| x | H       | 32     | 0.222590                        | 1.357956 | 0.548006 | x |
| x | H       | 33     | 0.382254                        | 1.192963 | 0.552415 | x |
| x | H       | 34     | -0.027963                       | 1.380594 | 0.525824 | x |
| x | H       | 35     | -0.086454                       | 1.505956 | 0.540241 | x |
| x | H       | 36     | -0.043027                       | 1.428216 | 0.580247 | x |
| x | H       | 37     | -0.081807                       | 0.629304 | 0.525344 | x |
| x | H       | 38     | -0.183114                       | 0.683990 | 0.551822 | x |
| x | H       | 39     | -0.079257                       | 0.662142 | 0.581093 | x |
| x | H       | 40     | -0.217051                       | 0.811612 | 0.514523 | x |
| x | H       | 41     | -0.098945                       | 0.806271 | 0.597126 | x |

|     |    |           |           |           |   |
|-----|----|-----------|-----------|-----------|---|
| x H | 42 | -0.305620 | 0.964148  | 0.513370  | x |
| x H | 43 | -0.376673 | 1.130550  | 0.507271  | x |
| x H | 44 | -0.170718 | 1.101393  | 0.608502  | x |
| x H | 45 | -0.098044 | 0.934893  | 0.613427  | x |
| x H | 46 | -0.305740 | 1.266231  | 0.615320  | x |
| x H | 47 | -0.349448 | 1.344685  | 0.575601  | x |
| x H | 48 | -0.224743 | 1.235946  | 0.580309  | x |
| x H | 49 | 0.007979  | 1.261928  | 0.320537  | x |
| x H | 50 | -0.023714 | 1.239826  | 0.266869  | x |
| x H | 51 | 0.055325  | 1.263173  | 0.279556  | x |
| x H | 52 | 0.122688  | 1.069882  | 0.266156  | x |
| x H | 53 | 0.191736  | 1.134600  | 0.347102  | x |
| x H | 54 | 0.256142  | 0.918020  | 0.268224  | x |
| x H | 55 | 0.402191  | 0.748096  | 0.281861  | x |
| x H | 56 | 0.476511  | 0.850360  | 0.399693  | x |
| x H | 57 | 0.331394  | 1.018327  | 0.386236  | x |
| x H | 58 | 0.620916  | 0.694772  | 0.392288  | x |
| x H | 59 | 0.631797  | 0.590852  | 0.387294  | x |
| x H | 60 | 0.533415  | 0.703908  | 0.412993  | x |
| x H | 61 | -1.035709 | 0.020399  | -0.062237 | x |
| x H | 62 | -1.159725 | 0.154464  | -0.012755 | x |
| x H | 63 | -1.188376 | -0.040956 | 0.013455  | x |
| x H | 64 | -1.060813 | -0.168128 | -0.035783 | x |
| x H | 65 | -1.483107 | 0.078949  | 0.114123  | x |
| x H | 66 | -1.401174 | 0.088038  | 0.066168  | x |
| x H | 67 | -1.405327 | 0.288406  | 0.161663  | x |
| x H | 68 | -1.478363 | 0.264458  | 0.207873  | x |
| x H | 69 | -1.494919 | 0.620707  | 0.115364  | x |
| x H | 70 | -1.448605 | 0.459568  | 0.116594  | x |
| x H | 71 | -1.334073 | 0.370340  | -0.003092 | x |
| x H | 72 | -1.389496 | 0.535801  | -0.001041 | x |
| x H | 73 | -1.268198 | 0.555722  | 0.081644  | x |
| x H | 74 | -1.130494 | 0.520518  | 0.133200  | x |
| x H | 75 | -1.336812 | 0.808336  | 0.194789  | x |
| x H | 76 | -1.467637 | 0.827157  | 0.144518  | x |
| x H | 77 | -1.296547 | 0.991712  | 0.339614  | x |
| x H | 78 | -1.269162 | 0.870472  | 0.278847  | x |
| x H | 79 | -0.962633 | 0.715180  | 0.303687  | x |
| x H | 80 | -1.002295 | 0.844843  | 0.361693  | x |
| x H | 81 | -0.654335 | 0.340497  | 0.266207  | x |
| x H | 82 | -0.825544 | 0.500607  | 0.272085  | x |
| x H | 83 | -0.905344 | 0.417574  | 0.149640  | x |
| x H | 84 | -0.732856 | 0.261925  | 0.148026  | x |
| x H | 85 | -0.867626 | -0.620974 | -0.019940 | x |
| x H | 86 | -0.841263 | -0.582236 | -0.055270 | x |
| x H | 87 | -0.875721 | -0.652659 | -0.074348 | x |



|     |     |           |           |           |   |
|-----|-----|-----------|-----------|-----------|---|
| x H | 88  | -1.044109 | -0.509289 | -0.047612 | x |
| x H | 89  | -0.976254 | -0.412237 | -0.068607 | x |
| x H | 90  | -1.094695 | -0.247032 | -0.078773 | x |
| x H | 91  | -1.260905 | -0.085765 | -0.073955 | x |
| x H | 92  | -1.357956 | -0.222590 | -0.048006 | x |
| x H | 93  | -1.192963 | -0.382254 | -0.052415 | x |
| x H | 94  | -1.380594 | 0.027963  | -0.025824 | x |
| x H | 95  | -1.505956 | 0.086454  | -0.040241 | x |
| x H | 96  | -1.428216 | 0.043027  | -0.080247 | x |
| x H | 97  | -0.629304 | 0.081807  | -0.025344 | x |
| x H | 98  | -0.683990 | 0.183114  | -0.051822 | x |
| x H | 99  | -0.662142 | 0.079257  | -0.081093 | x |
| x H | 100 | -0.811612 | 0.217051  | -0.014523 | x |
| x H | 101 | -0.806271 | 0.098945  | -0.097126 | x |
| x H | 102 | -0.964148 | 0.305620  | -0.013370 | x |
| x H | 103 | -1.130550 | 0.376673  | -0.007271 | x |
| x H | 104 | -1.101393 | 0.170718  | -0.108502 | x |
| x H | 105 | -0.934893 | 0.098044  | -0.113427 | x |
| x H | 106 | -1.266231 | 0.305740  | -0.115320 | x |
| x H | 107 | -1.344685 | 0.349448  | -0.075601 | x |
| x H | 108 | -1.235946 | 0.224743  | -0.080309 | x |
| x H | 109 | -1.261928 | -0.007979 | 0.179463  | x |
| x H | 110 | -1.239826 | 0.023714  | 0.233131  | x |
| x H | 111 | -1.263173 | -0.055325 | 0.220444  | x |
| x H | 112 | -1.069882 | -0.122688 | 0.233844  | x |
| x H | 113 | -1.134600 | -0.191736 | 0.152898  | x |
| x H | 114 | -0.918020 | -0.256142 | 0.231776  | x |
| x H | 115 | -0.748096 | -0.402191 | 0.218139  | x |
| x H | 116 | -0.850360 | -0.476511 | 0.100307  | x |
| x H | 117 | -1.018327 | -0.331394 | 0.113764  | x |
| x H | 118 | -0.694772 | -0.620916 | 0.107712  | x |
| x H | 119 | -0.590852 | -0.631797 | 0.112706  | x |
| x H | 120 | -0.703908 | -0.533415 | 0.087007  | x |
| x H | 121 | 0.020399  | -1.035709 | -0.562237 | x |
| x H | 122 | 0.154464  | -1.159725 | -0.512755 | x |
| x H | 123 | -0.040956 | -1.188376 | -0.486545 | x |
| x H | 124 | -0.168128 | -1.060813 | -0.535783 | x |
| x H | 125 | 0.078949  | -1.483107 | -0.385877 | x |
| x H | 126 | 0.088038  | -1.401174 | -0.433832 | x |
| x H | 127 | 0.288406  | -1.405327 | -0.338337 | x |
| x H | 128 | 0.264458  | -1.478363 | -0.292127 | x |
| x H | 129 | 0.620707  | -1.494919 | -0.384636 | x |
| x H | 130 | 0.459568  | -1.448605 | -0.383406 | x |
| x H | 131 | 0.370340  | -1.334073 | -0.503092 | x |
| x H | 132 | 0.535801  | -1.389496 | -0.501041 | x |
| x H | 133 | 0.555722  | -1.268198 | -0.418356 | x |

|     |     |           |           |           |   |
|-----|-----|-----------|-----------|-----------|---|
| x H | 134 | 0.520518  | -1.130494 | -0.366800 | x |
| x H | 135 | 0.808336  | -1.336812 | -0.305211 | x |
| x H | 136 | 0.827157  | -1.467637 | -0.355482 | x |
| x H | 137 | 0.991712  | -1.296547 | -0.160386 | x |
| x H | 138 | 0.870472  | -1.269162 | -0.221153 | x |
| x H | 139 | 0.715180  | -0.962633 | -0.196313 | x |
| x H | 140 | 0.844843  | -1.002295 | -0.138307 | x |
| x H | 141 | 0.340497  | -0.654335 | -0.233793 | x |
| x H | 142 | 0.500607  | -0.825544 | -0.227915 | x |
| x H | 143 | 0.417574  | -0.905344 | -0.350360 | x |
| x H | 144 | 0.261925  | -0.732856 | -0.351974 | x |
| x H | 145 | -0.620974 | -0.867626 | -0.519940 | x |
| x H | 146 | -0.582236 | -0.841263 | -0.555270 | x |
| x H | 147 | -0.652659 | -0.875721 | -0.574348 | x |
| x H | 148 | -0.509289 | -1.044109 | -0.547612 | x |
| x H | 149 | -0.412237 | -0.976254 | -0.568607 | x |
| x H | 150 | -0.247032 | -1.094695 | -0.578773 | x |
| x H | 151 | -0.085765 | -1.260905 | -0.573955 | x |
| x H | 152 | -0.222590 | -1.357956 | -0.548006 | x |
| x H | 153 | -0.382254 | -1.192963 | -0.552415 | x |
| x H | 154 | 0.027963  | -1.380594 | -0.525824 | x |
| x H | 155 | 0.086454  | -1.505956 | -0.540241 | x |
| x H | 156 | 0.043027  | -1.428216 | -0.580247 | x |
| x H | 157 | 0.081807  | -0.629304 | -0.525344 | x |
| x H | 158 | 0.183114  | -0.683990 | -0.551822 | x |
| x H | 159 | 0.079257  | -0.662142 | -0.581093 | x |
| x H | 160 | 0.217051  | -0.811612 | -0.514523 | x |
| x H | 161 | 0.098945  | -0.806271 | -0.597126 | x |
| x H | 162 | 0.305620  | -0.964148 | -0.513370 | x |
| x H | 163 | 0.376673  | -1.130550 | -0.507271 | x |
| x H | 164 | 0.170718  | -1.101393 | -0.608502 | x |
| x H | 165 | 0.098044  | -0.934893 | -0.613427 | x |
| x H | 166 | 0.305740  | -1.266231 | -0.615320 | x |
| x H | 167 | 0.349448  | -1.344685 | -0.575601 | x |
| x H | 168 | 0.224743  | -1.235946 | -0.580309 | x |
| x H | 169 | -0.007979 | -1.261928 | -0.320537 | x |
| x H | 170 | 0.023714  | -1.239826 | -0.266869 | x |
| x H | 171 | -0.055325 | -1.263173 | -0.279556 | x |
| x H | 172 | -0.122688 | -1.069882 | -0.266156 | x |
| x H | 173 | -0.191736 | -1.134600 | -0.347102 | x |
| x H | 174 | -0.256142 | -0.918020 | -0.268224 | x |
| x H | 175 | -0.402191 | -0.748096 | -0.281861 | x |
| x H | 176 | -0.476511 | -0.850360 | -0.399693 | x |
| x H | 177 | -0.331394 | -1.018327 | -0.386236 | x |
| x H | 178 | -0.620916 | -0.694772 | -0.392288 | x |
| x H | 179 | -0.631797 | -0.590852 | -0.387294 | x |

|     |     |           |           |           |   |
|-----|-----|-----------|-----------|-----------|---|
| x H | 180 | -0.533415 | -0.703908 | -0.412993 | x |
| x H | 181 | 1.035709  | -0.020399 | 1.062237  | x |
| x H | 182 | 1.159725  | -0.154464 | 1.012755  | x |
| x H | 183 | 1.188376  | 0.040956  | 0.986545  | x |
| x H | 184 | 1.060813  | 0.168128  | 1.035783  | x |
| x H | 185 | 1.483107  | -0.078949 | 0.885877  | x |
| x H | 186 | 1.401174  | -0.088038 | 0.933832  | x |
| x H | 187 | 1.405327  | -0.288406 | 0.838337  | x |
| x H | 188 | 1.478363  | -0.264458 | 0.792127  | x |
| x H | 189 | 1.494919  | -0.620707 | 0.884636  | x |
| x H | 190 | 1.448605  | -0.459568 | 0.883406  | x |
| x H | 191 | 1.334073  | -0.370340 | 1.003092  | x |
| x H | 192 | 1.389496  | -0.535801 | 1.001041  | x |
| x H | 193 | 1.268198  | -0.555722 | 0.918356  | x |
| x H | 194 | 1.130494  | -0.520518 | 0.866800  | x |
| x H | 195 | 1.336812  | -0.808336 | 0.805211  | x |
| x H | 196 | 1.467637  | -0.827157 | 0.855482  | x |
| x H | 197 | 1.296547  | -0.991712 | 0.660386  | x |
| x H | 198 | 1.269162  | -0.870472 | 0.721153  | x |
| x H | 199 | 0.962633  | -0.715180 | 0.696313  | x |
| x H | 200 | 1.002295  | -0.844843 | 0.638307  | x |
| x H | 201 | 0.654335  | -0.340497 | 0.733793  | x |
| x H | 202 | 0.825544  | -0.500607 | 0.727915  | x |
| x H | 203 | 0.905344  | -0.417574 | 0.850360  | x |
| x H | 204 | 0.732856  | -0.261925 | 0.851974  | x |
| x H | 205 | 0.867626  | 0.620974  | 1.019940  | x |
| x H | 206 | 0.841263  | 0.582236  | 1.055270  | x |
| x H | 207 | 0.875721  | 0.652659  | 1.074348  | x |
| x H | 208 | 1.044109  | 0.509289  | 1.047612  | x |
| x H | 209 | 0.976254  | 0.412237  | 1.068607  | x |
| x H | 210 | 1.094695  | 0.247032  | 1.078773  | x |
| x H | 211 | 1.260905  | 0.085765  | 1.073955  | x |
| x H | 212 | 1.357956  | 0.222590  | 1.048006  | x |
| x H | 213 | 1.192963  | 0.382254  | 1.052415  | x |
| x H | 214 | 1.380594  | -0.027963 | 1.025824  | x |
| x H | 215 | 1.505956  | -0.086454 | 1.040241  | x |
| x H | 216 | 1.428216  | -0.043027 | 1.080247  | x |
| x H | 217 | 0.629304  | -0.081807 | 1.025344  | x |
| x H | 218 | 0.683990  | -0.183114 | 1.051822  | x |
| x H | 219 | 0.662142  | -0.079257 | 1.081093  | x |
| x H | 220 | 0.811612  | -0.217051 | 1.014523  | x |
| x H | 221 | 0.806271  | -0.098945 | 1.097126  | x |
| x H | 222 | 0.964148  | -0.305620 | 1.013370  | x |
| x H | 223 | 1.130550  | -0.376673 | 1.007271  | x |
| x H | 224 | 1.101393  | -0.170718 | 1.108502  | x |
| x H | 225 | 0.934893  | -0.098044 | 1.113427  | x |

|     |     |           |           |          |   |
|-----|-----|-----------|-----------|----------|---|
| x H | 226 | 1.266231  | -0.305740 | 1.115320 | x |
| x H | 227 | 1.344685  | -0.349448 | 1.075601 | x |
| x H | 228 | 1.235946  | -0.224743 | 1.080309 | x |
| x H | 229 | 1.261928  | 0.007979  | 0.820537 | x |
| x H | 230 | 1.239826  | -0.023714 | 0.766869 | x |
| x H | 231 | 1.263173  | 0.055325  | 0.779556 | x |
| x H | 232 | 1.069882  | 0.122688  | 0.766156 | x |
| x H | 233 | 1.134600  | 0.191736  | 0.847102 | x |
| x H | 234 | 0.918020  | 0.256142  | 0.768224 | x |
| x H | 235 | 0.748096  | 0.402191  | 0.781861 | x |
| x H | 236 | 0.850360  | 0.476511  | 0.899693 | x |
| x H | 237 | 1.018327  | 0.331394  | 0.886236 | x |
| x H | 238 | 0.694772  | 0.620916  | 0.892288 | x |
| x H | 239 | 0.590852  | 0.631797  | 0.887294 | x |
| x H | 240 | 0.703908  | 0.533415  | 0.912993 | x |
| x C | 1   | -0.010714 | 1.071822  | 0.544729 | x |
| x C | 2   | -0.084145 | 1.140203  | 0.517428 | x |
| x C | 3   | -0.067708 | 1.185696  | 0.496955 | x |
| x C | 4   | 0.024460  | 1.156694  | 0.502889 | x |
| x C | 5   | 0.094898  | 1.086765  | 0.530422 | x |
| x C | 6   | -0.147822 | 1.262731  | 0.469870 | x |
| x C | 7   | -0.306029 | 1.354660  | 0.442938 | x |
| x C | 8   | -0.204190 | 1.356822  | 0.417501 | x |
| x C | 9   | -0.123264 | 1.463034  | 0.376337 | x |
| x C | 10  | -0.128894 | 1.418217  | 0.402876 | x |
| x C | 11  | -0.189758 | 1.397690  | 0.389486 | x |
| x C | 12  | -0.240291 | 1.420257  | 0.349382 | x |
| x C | 13  | -0.228601 | 1.461890  | 0.324056 | x |
| x C | 14  | -0.562746 | 1.459860  | 0.410208 | x |
| x C | 15  | -0.474493 | 1.434640  | 0.409807 | x |
| x C | 16  | -0.403383 | 1.388523  | 0.443441 | x |
| x C | 17  | -0.424926 | 1.372130  | 0.477002 | x |
| x C | 18  | -0.515628 | 1.401318  | 0.475810 | x |
| x C | 19  | -0.608483 | 1.280261  | 0.392018 | x |
| x C | 20  | -0.589879 | 1.203979  | 0.363811 | x |
| x C | 21  | -0.662373 | 1.222600  | 0.332044 | x |
| x C | 22  | -0.749308 | 1.318767  | 0.329046 | x |
| x C | 23  | -0.761104 | 1.391787  | 0.357359 | x |
| x C | 24  | -0.649125 | 1.142564  | 0.303349 | x |
| x C | 25  | -0.561631 | 0.980969  | 0.284250 | x |
| x C | 26  | -0.708334 | 1.091767  | 0.248701 | x |
| x C | 27  | -0.929430 | 1.223955  | 0.169790 | x |
| x C | 28  | -0.861787 | 1.208065  | 0.203329 | x |
| x C | 29  | -0.783584 | 1.113155  | 0.213882 | x |
| x C | 30  | -0.776240 | 1.037522  | 0.189752 | x |
| x C | 31  | -0.847188 | 1.059097  | 0.157222 | x |

|     |    |           |           |           |   |
|-----|----|-----------|-----------|-----------|---|
| x C | 32 | -0.361630 | 0.712452  | 0.258946  | x |
| x C | 33 | -0.449496 | 0.806736  | 0.255944  | x |
| x C | 34 | -0.471025 | 0.878766  | 0.288545  | x |
| x C | 35 | -0.403091 | 0.851985  | 0.323869  | x |
| x C | 36 | -0.316802 | 0.756041  | 0.325003  | x |
| x C | 37 | 0.593521  | 0.889352  | 0.550951  | x |
| x C | 38 | 0.503310  | 0.993575  | 0.554207  | x |
| x C | 39 | 0.417536  | 1.028223  | 0.563279  | x |
| x C | 40 | 0.326560  | 1.129325  | 0.564273  | x |
| x C | 41 | 0.241278  | 1.152561  | 0.571296  | x |
| x C | 42 | 0.150466  | 1.246052  | 0.568946  | x |
| x C | 43 | 0.144049  | 1.319610  | 0.559470  | x |
| x C | 44 | 0.228949  | 1.299581  | 0.555101  | x |
| x C | 45 | 0.318163  | 1.206324  | 0.557162  | x |
| x C | 46 | -0.029405 | 1.432440  | 0.549980  | x |
| x C | 47 | -0.125186 | 0.684734  | 0.550937  | x |
| x C | 48 | -0.167738 | 0.782952  | 0.543294  | x |
| x C | 49 | -0.150826 | 0.837226  | 0.569129  | x |
| x C | 50 | -0.195007 | 0.935590  | 0.563771  | x |
| x C | 51 | -0.274691 | 0.993079  | 0.534051  | x |
| x C | 52 | -0.315598 | 1.086793  | 0.530547  | x |
| x C | 53 | -0.279538 | 1.127475  | 0.557427  | x |
| x C | 54 | -0.200568 | 1.072086  | 0.587271  | x |
| x C | 55 | -0.159520 | 0.977358  | 0.589968  | x |
| x C | 56 | -0.299526 | 1.269006  | 0.582910  | x |
| x C | 57 | 0.036101  | 1.225717  | 0.289501  | x |
| x C | 58 | 0.121509  | 1.119358  | 0.291407  | x |
| x C | 59 | 0.195486  | 1.083020  | 0.322111  | x |
| x C | 60 | 0.281617  | 0.981634  | 0.326864  | x |
| x C | 61 | 0.303766  | 0.903672  | 0.297282  | x |
| x C | 62 | 0.385337  | 0.808485  | 0.304510  | x |
| x C | 63 | 0.447745  | 0.787742  | 0.341795  | x |
| x C | 64 | 0.429087  | 0.864031  | 0.370745  | x |
| x C | 65 | 0.346939  | 0.959182  | 0.363010  | x |
| x C | 66 | 0.580578  | 0.669792  | 0.387328  | x |
| x C | 67 | -1.071822 | 0.010714  | -0.044729 | x |
| x C | 68 | -1.140203 | 0.084145  | -0.017428 | x |
| x C | 69 | -1.185696 | 0.067708  | 0.003045  | x |
| x C | 70 | -1.156694 | -0.024460 | -0.002889 | x |
| x C | 71 | -1.086765 | -0.094898 | -0.030422 | x |
| x C | 72 | -1.262731 | 0.147822  | 0.030130  | x |
| x C | 73 | -1.354660 | 0.306029  | 0.057062  | x |
| x C | 74 | -1.356822 | 0.204190  | 0.082499  | x |
| x C | 75 | -1.463034 | 0.123264  | 0.123663  | x |
| x C | 76 | -1.418217 | 0.128894  | 0.097124  | x |
| x C | 77 | -1.397690 | 0.189758  | 0.110514  | x |

|     |     |           |           |           |   |
|-----|-----|-----------|-----------|-----------|---|
| x C | 78  | -1.420257 | 0.240291  | 0.150618  | x |
| x C | 79  | -1.461890 | 0.228601  | 0.175944  | x |
| x C | 80  | -1.459860 | 0.562746  | 0.089792  | x |
| x C | 81  | -1.434640 | 0.474493  | 0.090193  | x |
| x C | 82  | -1.388523 | 0.403383  | 0.056559  | x |
| x C | 83  | -1.372130 | 0.424926  | 0.022998  | x |
| x C | 84  | -1.401318 | 0.515628  | 0.024190  | x |
| x C | 85  | -1.280261 | 0.608483  | 0.107982  | x |
| x C | 86  | -1.203979 | 0.589879  | 0.136189  | x |
| x C | 87  | -1.222600 | 0.662373  | 0.167956  | x |
| x C | 88  | -1.318767 | 0.749308  | 0.170954  | x |
| x C | 89  | -1.391787 | 0.761104  | 0.142641  | x |
| x C | 90  | -1.142564 | 0.649125  | 0.196651  | x |
| x C | 91  | -0.980969 | 0.561631  | 0.215750  | x |
| x C | 92  | -1.091767 | 0.708334  | 0.251299  | x |
| x C | 93  | -1.223955 | 0.929430  | 0.330210  | x |
| x C | 94  | -1.208065 | 0.861787  | 0.296671  | x |
| x C | 95  | -1.113155 | 0.783584  | 0.286118  | x |
| x C | 96  | -1.037522 | 0.776240  | 0.310248  | x |
| x C | 97  | -1.059097 | 0.847188  | 0.342778  | x |
| x C | 98  | -0.712452 | 0.361630  | 0.241054  | x |
| x C | 99  | -0.806736 | 0.449496  | 0.244056  | x |
| x C | 100 | -0.878766 | 0.471025  | 0.211455  | x |
| x C | 101 | -0.851985 | 0.403091  | 0.176131  | x |
| x C | 102 | -0.756041 | 0.316802  | 0.174997  | x |
| x C | 103 | -0.889352 | -0.593521 | -0.050951 | x |
| x C | 104 | -0.993575 | -0.503310 | -0.054207 | x |
| x C | 105 | -1.028223 | -0.417536 | -0.063279 | x |
| x C | 106 | -1.129325 | -0.326560 | -0.064273 | x |
| x C | 107 | -1.152561 | -0.241278 | -0.071296 | x |
| x C | 108 | -1.246052 | -0.150466 | -0.068946 | x |
| x C | 109 | -1.319610 | -0.144049 | -0.059470 | x |
| x C | 110 | -1.299581 | -0.228949 | -0.055101 | x |
| x C | 111 | -1.206324 | -0.318163 | -0.057162 | x |
| x C | 112 | -1.432440 | 0.029405  | -0.049980 | x |
| x C | 113 | -0.684734 | 0.125186  | -0.050937 | x |
| x C | 114 | -0.782952 | 0.167738  | -0.043294 | x |
| x C | 115 | -0.837226 | 0.150826  | -0.069129 | x |
| x C | 116 | -0.935590 | 0.195007  | -0.063771 | x |
| x C | 117 | -0.993079 | 0.274691  | -0.034051 | x |
| x C | 118 | -1.086793 | 0.315598  | -0.030547 | x |
| x C | 119 | -1.127475 | 0.279538  | -0.057427 | x |
| x C | 120 | -1.072086 | 0.200568  | -0.087271 | x |
| x C | 121 | -0.977358 | 0.159520  | -0.089968 | x |
| x C | 122 | -1.269006 | 0.299526  | -0.082910 | x |
| x C | 123 | -1.225717 | -0.036101 | 0.210499  | x |

|     |     |           |           |           |   |
|-----|-----|-----------|-----------|-----------|---|
| x C | 124 | -1.119358 | -0.121509 | 0.208593  | x |
| x C | 125 | -1.083020 | -0.195486 | 0.177889  | x |
| x C | 126 | -0.981634 | -0.281617 | 0.173136  | x |
| x C | 127 | -0.903672 | -0.303766 | 0.202718  | x |
| x C | 128 | -0.808485 | -0.385337 | 0.195490  | x |
| x C | 129 | -0.787742 | -0.447745 | 0.158205  | x |
| x C | 130 | -0.864031 | -0.429087 | 0.129255  | x |
| x C | 131 | -0.959182 | -0.346939 | 0.136990  | x |
| x C | 132 | -0.669792 | -0.580578 | 0.112672  | x |
| x C | 133 | 0.010714  | -1.071822 | -0.544729 | x |
| x C | 134 | 0.084145  | -1.140203 | -0.517428 | x |
| x C | 135 | 0.067708  | -1.185696 | -0.496955 | x |
| x C | 136 | -0.024460 | -1.156694 | -0.502889 | x |
| x C | 137 | -0.094898 | -1.086765 | -0.530422 | x |
| x C | 138 | 0.147822  | -1.262731 | -0.469870 | x |
| x C | 139 | 0.306029  | -1.354660 | -0.442938 | x |
| x C | 140 | 0.204190  | -1.356822 | -0.417501 | x |
| x C | 141 | 0.123264  | -1.463034 | -0.376337 | x |
| x C | 142 | 0.128894  | -1.418217 | -0.402876 | x |
| x C | 143 | 0.189758  | -1.397690 | -0.389486 | x |
| x C | 144 | 0.240291  | -1.420257 | -0.349382 | x |
| x C | 145 | 0.228601  | -1.461890 | -0.324056 | x |
| x C | 146 | 0.562746  | -1.459860 | -0.410208 | x |
| x C | 147 | 0.474493  | -1.434640 | -0.409807 | x |
| x C | 148 | 0.403383  | -1.388523 | -0.443441 | x |
| x C | 149 | 0.424926  | -1.372130 | -0.477002 | x |
| x C | 150 | 0.515628  | -1.401318 | -0.475810 | x |
| x C | 151 | 0.608483  | -1.280261 | -0.392018 | x |
| x C | 152 | 0.589879  | -1.203979 | -0.363811 | x |
| x C | 153 | 0.662373  | -1.222600 | -0.332044 | x |
| x C | 154 | 0.749308  | -1.318767 | -0.329046 | x |
| x C | 155 | 0.761104  | -1.391787 | -0.357359 | x |
| x C | 156 | 0.649125  | -1.142564 | -0.303349 | x |
| x C | 157 | 0.561631  | -0.980969 | -0.284250 | x |
| x C | 158 | 0.708334  | -1.091767 | -0.248701 | x |
| x C | 159 | 0.929430  | -1.223955 | -0.169790 | x |
| x C | 160 | 0.861787  | -1.208065 | -0.203329 | x |
| x C | 161 | 0.783584  | -1.113155 | -0.213882 | x |
| x C | 162 | 0.776240  | -1.037522 | -0.189752 | x |
| x C | 163 | 0.847188  | -1.059097 | -0.157222 | x |
| x C | 164 | 0.361630  | -0.712452 | -0.258946 | x |
| x C | 165 | 0.449496  | -0.806736 | -0.255944 | x |
| x C | 166 | 0.471025  | -0.878766 | -0.288545 | x |
| x C | 167 | 0.403091  | -0.851985 | -0.323869 | x |
| x C | 168 | 0.316802  | -0.756041 | -0.325003 | x |
| x C | 169 | -0.593521 | -0.889352 | -0.550951 | x |

|     |     |           |           |           |   |
|-----|-----|-----------|-----------|-----------|---|
| x C | 170 | -0.503310 | -0.993575 | -0.554207 | x |
| x C | 171 | -0.417536 | -1.028223 | -0.563279 | x |
| x C | 172 | -0.326560 | -1.129325 | -0.564273 | x |
| x C | 173 | -0.241278 | -1.152561 | -0.571296 | x |
| x C | 174 | -0.150466 | -1.246052 | -0.568946 | x |
| x C | 175 | -0.144049 | -1.319610 | -0.559470 | x |
| x C | 176 | -0.228949 | -1.299581 | -0.555101 | x |
| x C | 177 | -0.318163 | -1.206324 | -0.557162 | x |
| x C | 178 | 0.029405  | -1.432440 | -0.549980 | x |
| x C | 179 | 0.125186  | -0.684734 | -0.550937 | x |
| x C | 180 | 0.167738  | -0.782952 | -0.543294 | x |
| x C | 181 | 0.150826  | -0.837226 | -0.569129 | x |
| x C | 182 | 0.195007  | -0.935590 | -0.563771 | x |
| x C | 183 | 0.274691  | -0.993079 | -0.534051 | x |
| x C | 184 | 0.315598  | -1.086793 | -0.530547 | x |
| x C | 185 | 0.279538  | -1.127475 | -0.557427 | x |
| x C | 186 | 0.200568  | -1.072086 | -0.587271 | x |
| x C | 187 | 0.159520  | -0.977358 | -0.589968 | x |
| x C | 188 | 0.299526  | -1.269006 | -0.582910 | x |
| x C | 189 | -0.036101 | -1.225717 | -0.289501 | x |
| x C | 190 | -0.121509 | -1.119358 | -0.291407 | x |
| x C | 191 | -0.195486 | -1.083020 | -0.322111 | x |
| x C | 192 | -0.281617 | -0.981634 | -0.326864 | x |
| x C | 193 | -0.303766 | -0.903672 | -0.297282 | x |
| x C | 194 | -0.385337 | -0.808485 | -0.304510 | x |
| x C | 195 | -0.447745 | -0.787742 | -0.341795 | x |
| x C | 196 | -0.429087 | -0.864031 | -0.370745 | x |
| x C | 197 | -0.346939 | -0.959182 | -0.363010 | x |
| x C | 198 | -0.580578 | -0.669792 | -0.387328 | x |
| x C | 199 | 1.071822  | -0.010714 | 1.044729  | x |
| x C | 200 | 1.140203  | -0.084145 | 1.017428  | x |
| x C | 201 | 1.185696  | -0.067708 | 0.996955  | x |
| x C | 202 | 1.156694  | 0.024460  | 1.002889  | x |
| x C | 203 | 1.086765  | 0.094898  | 1.030422  | x |
| x C | 204 | 1.262731  | -0.147822 | 0.969870  | x |
| x C | 205 | 1.354660  | -0.306029 | 0.942938  | x |
| x C | 206 | 1.356822  | -0.204190 | 0.917501  | x |
| x C | 207 | 1.463034  | -0.123264 | 0.876337  | x |
| x C | 208 | 1.418217  | -0.128894 | 0.902876  | x |
| x C | 209 | 1.397690  | -0.189758 | 0.889486  | x |
| x C | 210 | 1.420257  | -0.240291 | 0.849382  | x |
| x C | 211 | 1.461890  | -0.228601 | 0.824056  | x |
| x C | 212 | 1.459860  | -0.562746 | 0.910208  | x |
| x C | 213 | 1.434640  | -0.474493 | 0.909807  | x |
| x C | 214 | 1.388523  | -0.403383 | 0.943441  | x |
| x C | 215 | 1.372130  | -0.424926 | 0.977002  | x |



|     |     |          |           |          |   |
|-----|-----|----------|-----------|----------|---|
| x C | 216 | 1.401318 | -0.515628 | 0.975810 | x |
| x C | 217 | 1.280261 | -0.608483 | 0.892018 | x |
| x C | 218 | 1.203979 | -0.589879 | 0.863811 | x |
| x C | 219 | 1.222600 | -0.662373 | 0.832044 | x |
| x C | 220 | 1.318767 | -0.749308 | 0.829046 | x |
| x C | 221 | 1.391787 | -0.761104 | 0.857359 | x |
| x C | 222 | 1.142564 | -0.649125 | 0.803349 | x |
| x C | 223 | 0.980969 | -0.561631 | 0.784250 | x |
| x C | 224 | 1.091767 | -0.708334 | 0.748701 | x |
| x C | 225 | 1.223955 | -0.929430 | 0.669790 | x |
| x C | 226 | 1.208065 | -0.861787 | 0.703329 | x |
| x C | 227 | 1.113155 | -0.783584 | 0.713882 | x |
| x C | 228 | 1.037522 | -0.776240 | 0.689752 | x |
| x C | 229 | 1.059097 | -0.847188 | 0.657222 | x |
| x C | 230 | 0.712452 | -0.361630 | 0.758946 | x |
| x C | 231 | 0.806736 | -0.449496 | 0.755944 | x |
| x C | 232 | 0.878766 | -0.471025 | 0.788545 | x |
| x C | 233 | 0.851985 | -0.403091 | 0.823869 | x |
| x C | 234 | 0.756041 | -0.316802 | 0.825003 | x |
| x C | 235 | 0.889352 | 0.593521  | 1.050951 | x |
| x C | 236 | 0.993575 | 0.503310  | 1.054207 | x |
| x C | 237 | 1.028223 | 0.417536  | 1.063279 | x |
| x C | 238 | 1.129325 | 0.326560  | 1.064273 | x |
| x C | 239 | 1.152561 | 0.241278  | 1.071296 | x |
| x C | 240 | 1.246052 | 0.150466  | 1.068946 | x |
| x C | 241 | 1.319610 | 0.144049  | 1.059470 | x |
| x C | 242 | 1.299581 | 0.228949  | 1.055101 | x |
| x C | 243 | 1.206324 | 0.318163  | 1.057162 | x |
| x C | 244 | 1.432440 | -0.029405 | 1.049980 | x |
| x C | 245 | 0.684734 | -0.125186 | 1.050937 | x |
| x C | 246 | 0.782952 | -0.167738 | 1.043294 | x |
| x C | 247 | 0.837226 | -0.150826 | 1.069129 | x |
| x C | 248 | 0.935590 | -0.195007 | 1.063771 | x |
| x C | 249 | 0.993079 | -0.274691 | 1.034051 | x |
| x C | 250 | 1.086793 | -0.315598 | 1.030547 | x |
| x C | 251 | 1.127475 | -0.279538 | 1.057427 | x |
| x C | 252 | 1.072086 | -0.200568 | 1.087271 | x |
| x C | 253 | 0.977358 | -0.159520 | 1.089968 | x |
| x C | 254 | 1.269006 | -0.299526 | 1.082910 | x |
| x C | 255 | 1.225717 | 0.036101  | 0.789501 | x |
| x C | 256 | 1.119358 | 0.121509  | 0.791407 | x |
| x C | 257 | 1.083020 | 0.195486  | 0.822111 | x |
| x C | 258 | 0.981634 | 0.281617  | 0.826864 | x |
| x C | 259 | 0.903672 | 0.303766  | 0.797282 | x |
| x C | 260 | 0.808485 | 0.385337  | 0.804510 | x |
| x C | 261 | 0.787742 | 0.447745  | 0.841795 | x |

|     |     |           |           |           |   |
|-----|-----|-----------|-----------|-----------|---|
| x C | 262 | 0.864031  | 0.429087  | 0.870745  | x |
| x C | 263 | 0.959182  | 0.346939  | 0.863010  | x |
| x C | 264 | 0.669792  | 0.580578  | 0.887328  | x |
| x N | 1   | -0.172093 | 1.484417  | 0.337398  | x |
| x N | 2   | 0.077039  | 1.046894  | 0.552062  | x |
| x N | 3   | -0.583397 | 1.443782  | 0.442732  | x |
| x N | 4   | -0.129190 | 1.296595  | 0.445137  | x |
| x N | 5   | -0.236327 | 1.294379  | 0.471687  | x |
| x N | 6   | -0.292561 | 1.384257  | 0.413445  | x |
| x N | 7   | -0.692426 | 1.373116  | 0.389050  | x |
| x N | 8   | -0.720650 | 1.166959  | 0.272424  | x |
| x N | 9   | -0.567557 | 1.050712  | 0.310323  | x |
| x N | 10  | -0.630697 | 0.997629  | 0.253703  | x |
| x N | 11  | -0.295499 | 0.686860  | 0.292919  | x |
| x N | 12  | -0.923166 | 1.150854  | 0.147180  | x |
| x N | 13  | -1.484417 | 0.172093  | 0.162602  | x |
| x N | 14  | -1.046894 | -0.077039 | -0.052062 | x |
| x N | 15  | -1.443782 | 0.583397  | 0.057268  | x |
| x N | 16  | -1.296595 | 0.129190  | 0.054863  | x |
| x N | 17  | -1.294379 | 0.236327  | 0.028313  | x |
| x N | 18  | -1.384257 | 0.292561  | 0.086555  | x |
| x N | 19  | -1.373116 | 0.692426  | 0.110950  | x |
| x N | 20  | -1.166959 | 0.720650  | 0.227576  | x |
| x N | 21  | -1.050712 | 0.567557  | 0.189677  | x |
| x N | 22  | -0.997629 | 0.630697  | 0.246297  | x |
| x N | 23  | -0.686860 | 0.295499  | 0.207081  | x |
| x N | 24  | -1.150854 | 0.923166  | 0.352820  | x |
| x N | 25  | 0.172093  | -1.484417 | -0.337398 | x |
| x N | 26  | -0.077039 | -1.046894 | -0.552062 | x |
| x N | 27  | 0.583397  | -1.443782 | -0.442732 | x |
| x N | 28  | 0.129190  | -1.296595 | -0.445137 | x |
| x N | 29  | 0.236327  | -1.294379 | -0.471687 | x |
| x N | 30  | 0.292561  | -1.384257 | -0.413445 | x |
| x N | 31  | 0.692426  | -1.373116 | -0.389050 | x |
| x N | 32  | 0.720650  | -1.166959 | -0.272424 | x |
| x N | 33  | 0.567557  | -1.050712 | -0.310323 | x |
| x N | 34  | 0.630697  | -0.997629 | -0.253703 | x |
| x N | 35  | 0.295499  | -0.686860 | -0.292919 | x |
| x N | 36  | 0.923166  | -1.150854 | -0.147180 | x |
| x N | 37  | 1.484417  | -0.172093 | 0.837398  | x |
| x N | 38  | 1.046894  | 0.077039  | 1.052062  | x |
| x N | 39  | 1.443782  | -0.583397 | 0.942732  | x |
| x N | 40  | 1.296595  | -0.129190 | 0.945137  | x |
| x N | 41  | 1.294379  | -0.236327 | 0.971687  | x |
| x N | 42  | 1.384257  | -0.292561 | 0.913445  | x |
| x N | 43  | 1.373116  | -0.692426 | 0.889050  | x |

|      |    |           |           |           |   |
|------|----|-----------|-----------|-----------|---|
| x N  | 44 | 1.166959  | -0.720650 | 0.772424  | x |
| x N  | 45 | 1.050712  | -0.567557 | 0.810323  | x |
| x N  | 46 | 0.997629  | -0.630697 | 0.753703  | x |
| x N  | 47 | 0.686860  | -0.295499 | 0.792919  | x |
| x N  | 48 | 1.150854  | -0.923166 | 0.647180  | x |
| x O  | 1  | 0.059847  | 1.412602  | 0.553754  | x |
| x O  | 2  | -0.328077 | 1.222589  | 0.552767  | x |
| x O  | 3  | 0.524690  | 0.691215  | 0.346904  | x |
| x O  | 4  | -1.412602 | -0.059847 | -0.053754 | x |
| x O  | 5  | -1.222589 | 0.328077  | -0.052767 | x |
| x O  | 6  | -0.691215 | -0.524690 | 0.153096  | x |
| x O  | 7  | -0.059847 | -1.412602 | -0.553754 | x |
| x O  | 8  | 0.328077  | -1.222589 | -0.552767 | x |
| x O  | 9  | -0.524690 | -0.691215 | -0.346904 | x |
| x O  | 10 | 1.412602  | 0.059847  | 1.053754  | x |
| x O  | 11 | 1.222589  | -0.328077 | 1.052767  | x |
| x O  | 12 | 0.691215  | 0.524690  | 0.846904  | x |
| x Zn | 1  | -0.161537 | 1.545919  | 0.293639  | x |
| x Zn | 2  | 0.174166  | 0.966458  | 0.602152  | x |
| x Zn | 3  | -0.715839 | 1.480023  | 0.437086  | x |
| x Zn | 4  | -1.545919 | 0.161537  | 0.206361  | x |
| x Zn | 5  | -0.966458 | -0.174166 | -0.102152 | x |
| x Zn | 6  | -1.480023 | 0.715839  | 0.062914  | x |
| x Zn | 7  | 0.161537  | -1.545919 | -0.293639 | x |
| x Zn | 8  | -0.174166 | -0.966458 | -0.602152 | x |
| x Zn | 9  | 0.715839  | -1.480023 | -0.437086 | x |
| x Zn | 10 | 1.545919  | -0.161537 | 0.793639  | x |
| x Zn | 11 | 0.966458  | 0.174166  | 1.102152  | x |
| x Zn | 12 | 1.480023  | -0.715839 | 0.937086  | x |
| x I  | 1  | -0.150634 | 1.449980  | 0.222754  | x |
| x I  | 2  | -0.028704 | 1.550176  | 0.329277  | x |
| x I  | 3  | 0.347891  | 0.859692  | 0.582767  | x |
| x I  | 4  | 0.105906  | 0.905324  | 0.629971  | x |
| x I  | 5  | -0.842286 | 1.635828  | 0.398762  | x |
| x I  | 6  | -0.716259 | 1.428209  | 0.503843  | x |
| x I  | 7  | -1.449980 | 0.150634  | 0.277246  | x |
| x I  | 8  | -1.550176 | 0.028704  | 0.170723  | x |
| x I  | 9  | -0.859692 | -0.347891 | -0.082767 | x |
| x I  | 10 | -0.905324 | -0.105906 | -0.129971 | x |
| x I  | 11 | -1.635828 | 0.842286  | 0.101238  | x |
| x I  | 12 | -1.428209 | 0.716259  | -0.003843 | x |
| x I  | 13 | 0.150634  | -1.449980 | -0.222754 | x |
| x I  | 14 | 0.028704  | -1.550176 | -0.329277 | x |
| x I  | 15 | -0.347891 | -0.859692 | -0.582767 | x |
| x I  | 16 | -0.105906 | -0.905324 | -0.629971 | x |
| x I  | 17 | 0.842286  | -1.635828 | -0.398762 | x |

|     |    |          |           |           |   |
|-----|----|----------|-----------|-----------|---|
| x I | 18 | 0.716259 | -1.428209 | -0.503843 | x |
| x I | 19 | 1.449980 | -0.150634 | 0.722754  | x |
| x I | 20 | 1.550176 | -0.028704 | 0.829277  | x |
| x I | 21 | 0.859692 | 0.347891  | 1.082767  | x |
| x I | 22 | 0.905324 | 0.105906  | 1.129971  | x |
| x I | 23 | 1.635828 | -0.842286 | 0.898762  | x |
| x I | 24 | 1.428209 | -0.716259 | 1.003843  | x |

**Table S5.** Fractional atomic coordinates of the optimised structure of (+)-artemisinin@**1a**

| x | Element | Atom   | Fractional coordinates of atoms |          |           | x |
|---|---------|--------|---------------------------------|----------|-----------|---|
| x |         | Number | u                               | v        | w         | x |
| x | -----   |        |                                 |          |           | x |
| x | H       | 1      | -1.213154                       | 1.491774 | -0.145004 | x |
| x | H       | 2      | -1.095408                       | 1.431368 | -0.083182 | x |
| x | H       | 3      | -1.315235                       | 1.713389 | -0.018840 | x |
| x | H       | 4      | -1.426504                       | 1.762557 | -0.083075 | x |
| x | H       | 5      | -0.677082                       | 1.132623 | 0.077052  | x |
| x | H       | 6      | -0.820837                       | 1.314887 | 0.080412  | x |
| x | H       | 7      | -0.940665                       | 1.262121 | -0.036130 | x |
| x | H       | 8      | -0.792256                       | 1.081424 | -0.034719 | x |
| x | H       | 9      | -1.237838                       | 1.886938 | 0.117158  | x |
| x | H       | 10     | -1.221753                       | 1.763521 | 0.060587  | x |
| x | H       | 11     | -0.930523                       | 1.539573 | 0.117733  | x |
| x | H       | 12     | -0.958234                       | 1.669937 | 0.172170  | x |
| x | H       | 13     | -0.777965                       | 0.987036 | 0.043768  | x |
| x | H       | 14     | -0.800742                       | 0.939351 | 0.095707  | x |
| x | H       | 15     | -0.494031                       | 0.771955 | 0.139806  | x |
| x | H       | 16     | -0.482992                       | 0.827645 | 0.087075  | x |
| x | H       | 17     | -0.936391                       | 0.837914 | 0.247319  | x |
| x | H       | 18     | -0.784564                       | 0.802009 | 0.242691  | x |
| x | H       | 19     | -0.891395                       | 0.848381 | 0.118851  | x |
| x | H       | 20     | -1.038401                       | 0.882623 | 0.128298  | x |
| x | H       | 21     | -0.293508                       | 0.638532 | 0.286347  | x |
| x | H       | 22     | -0.438343                       | 0.742711 | 0.236678  | x |
| x | H       | 23     | -0.531345                       | 0.596198 | 0.243138  | x |
| x | H       | 24     | -0.376472                       | 0.490424 | 0.290348  | x |
| x | H       | 25     | -0.395571                       | 0.663692 | 0.356136  | x |
| x | H       | 26     | -0.455693                       | 0.780895 | 0.418795  | x |
| x | H       | 27     | -0.166098                       | 0.568840 | 0.480554  | x |
| x | H       | 28     | -0.117950                       | 0.457395 | 0.416248  | x |
| x | H       | 29     | -0.742960                       | 1.195853 | 0.582731  | x |
| x | H       | 30     | -0.561443                       | 1.052913 | 0.585550  | x |
| x | H       | 31     | -0.615155                       | 0.946220 | 0.465248  | x |
| x | H       | 32     | -0.796012                       | 1.092117 | 0.468141  | x |
| x | H       | 33     | 0.011087                        | 0.631785 | 0.617427  | x |
| x | H       | 34     | -0.114375                       | 0.650219 | 0.561214  | x |
| x | H       | 35     | -0.334264                       | 0.943753 | 0.618005  | x |
| x | H       | 36     | -0.201724                       | 0.916064 | 0.670851  | x |
| x | H       | 37     | -0.037109                       | 0.934878 | 0.749489  | x |
| x | H       | 38     | -0.073576                       | 1.089118 | 0.748219  | x |
| x | H       | 39     | -0.036887                       | 0.996476 | 0.623283  | x |
| x | H       | 40     | -0.003328                       | 0.847434 | 0.629115  | x |
| x | H       | 41     | -0.287004                       | 1.615946 | 0.770471  | x |

|     |    |           |          |           |   |
|-----|----|-----------|----------|-----------|---|
| x H | 42 | -0.183044 | 1.467213 | 0.720632  | x |
| x H | 43 | -0.264642 | 1.337661 | 0.756619  | x |
| x H | 44 | -0.370397 | 1.493954 | 0.803342  | x |
| x H | 45 | 0.128441  | 1.092832 | 0.555833  | x |
| x H | 46 | 0.068216  | 1.077355 | 0.604668  | x |
| x H | 47 | -0.136563 | 1.392200 | 0.631908  | x |
| x H | 48 | -0.072012 | 1.397751 | 0.581056  | x |
| x H | 49 | 0.228888  | 0.284371 | 0.248990  | x |
| x H | 50 | 0.126175  | 0.304138 | 0.254138  | x |
| x H | 51 | 0.241873  | 0.217828 | 0.281140  | x |
| x H | 52 | 0.129494  | 0.374738 | 0.324405  | x |
| x H | 53 | 0.294413  | 0.349109 | 0.307322  | x |
| x H | 54 | 0.186436  | 0.536421 | 0.319774  | x |
| x H | 55 | 0.009797  | 0.626404 | 0.305870  | x |
| x H | 56 | 0.020574  | 0.567825 | 0.340787  | x |
| x H | 57 | 0.024606  | 0.482711 | 0.272423  | x |
| x H | 58 | 0.120883  | 0.469289 | 0.264430  | x |
| x H | 59 | 0.364882  | 0.196041 | 0.323503  | x |
| x H | 60 | 0.282631  | 0.253555 | 0.358056  | x |
| x H | 61 | 0.445980  | 0.176819 | 0.392644  | x |
| x H | 62 | 0.456741  | 0.240481 | 0.369948  | x |
| x H | 63 | 0.393533  | 0.355701 | 0.480184  | x |
| x H | 64 | 0.500558  | 0.253097 | 0.455855  | x |
| x H | 65 | 0.418641  | 0.243243 | 0.462269  | x |
| x H | 66 | 0.137227  | 0.439757 | 0.381559  | x |
| x H | 67 | 0.198972  | 0.606735 | 0.387021  | x |
| x H | 68 | -0.019475 | 0.755096 | 0.353816  | x |
| x H | 69 | 0.075665  | 0.720057 | 0.331986  | x |
| x H | 70 | 0.056459  | 0.778790 | 0.382174  | x |
| x H | 71 | -0.327514 | 0.881659 | 0.373788  | x |
| x H | 72 | -0.213177 | 0.822547 | 0.359581  | x |
| x H | 73 | -0.246165 | 0.753144 | 0.355479  | x |
| x H | 74 | -0.536246 | 0.909786 | 0.308043  | x |
| x H | 75 | -0.517986 | 0.993994 | 0.320069  | x |
| x H | 76 | -0.461110 | 0.905792 | 0.353198  | x |
| x H | 77 | -0.221001 | 0.694480 | 0.283059  | x |
| x H | 78 | -0.187160 | 0.761790 | 0.284926  | x |
| x H | 79 | -0.285009 | 0.782156 | 0.248903  | x |
| x H | 80 | -0.401440 | 0.963313 | 0.272988  | x |
| x H | 81 | -0.301214 | 0.943352 | 0.306538  | x |
| x H | 82 | -0.412555 | 1.006755 | 0.324936  | x |
| x H | 83 | -1.491774 | 1.213154 | 0.145004  | x |
| x H | 84 | -1.431368 | 1.095408 | 0.083182  | x |
| x H | 85 | -1.713389 | 1.315235 | 0.018840  | x |
| x H | 86 | -1.762557 | 1.426504 | 0.083075  | x |
| x H | 87 | -1.132623 | 0.677082 | -0.077052 | x |

|     |     |           |           |           |   |
|-----|-----|-----------|-----------|-----------|---|
| x H | 88  | -1.314887 | 0.820837  | -0.080412 | x |
| x H | 89  | -1.262121 | 0.940665  | 0.036130  | x |
| x H | 90  | -1.081424 | 0.792256  | 0.034719  | x |
| x H | 91  | -1.886938 | 1.237838  | -0.117158 | x |
| x H | 92  | -1.763521 | 1.221753  | -0.060587 | x |
| x H | 93  | -1.539573 | 0.930523  | -0.117733 | x |
| x H | 94  | -1.669937 | 0.958234  | -0.172170 | x |
| x H | 95  | -0.987036 | 0.777965  | -0.043768 | x |
| x H | 96  | -0.939351 | 0.800742  | -0.095707 | x |
| x H | 97  | -0.771955 | 0.494031  | -0.139806 | x |
| x H | 98  | -0.827645 | 0.482992  | -0.087075 | x |
| x H | 99  | -0.837914 | 0.936391  | -0.247319 | x |
| x H | 100 | -0.802009 | 0.784564  | -0.242691 | x |
| x H | 101 | -0.848381 | 0.891395  | -0.118851 | x |
| x H | 102 | -0.882623 | 1.038401  | -0.128298 | x |
| x H | 103 | -0.638532 | 0.293508  | -0.286347 | x |
| x H | 104 | -0.742711 | 0.438343  | -0.236678 | x |
| x H | 105 | -0.596198 | 0.531345  | -0.243138 | x |
| x H | 106 | -0.490424 | 0.376472  | -0.290348 | x |
| x H | 107 | -0.663692 | 0.395571  | -0.356136 | x |
| x H | 108 | -0.780895 | 0.455693  | -0.418795 | x |
| x H | 109 | -0.568840 | 0.166098  | -0.480554 | x |
| x H | 110 | -0.457395 | 0.117950  | -0.416248 | x |
| x H | 111 | -1.195853 | 0.742960  | -0.582731 | x |
| x H | 112 | -1.052913 | 0.561443  | -0.585550 | x |
| x H | 113 | -0.946220 | 0.615155  | -0.465248 | x |
| x H | 114 | -1.092117 | 0.796012  | -0.468141 | x |
| x H | 115 | -0.631785 | -0.011087 | -0.617427 | x |
| x H | 116 | -0.650219 | 0.114375  | -0.561214 | x |
| x H | 117 | -0.943753 | 0.334264  | -0.618005 | x |
| x H | 118 | -0.916064 | 0.201724  | -0.670851 | x |
| x H | 119 | -0.934878 | 0.037109  | -0.749489 | x |
| x H | 120 | -1.089118 | 0.073576  | -0.748219 | x |
| x H | 121 | -0.996476 | 0.036887  | -0.623283 | x |
| x H | 122 | -0.847434 | 0.003328  | -0.629115 | x |
| x H | 123 | -1.615946 | 0.287004  | -0.770471 | x |
| x H | 124 | -1.467213 | 0.183044  | -0.720632 | x |
| x H | 125 | -1.337661 | 0.264642  | -0.756619 | x |
| x H | 126 | -1.493954 | 0.370397  | -0.803342 | x |
| x H | 127 | -1.092832 | -0.128441 | -0.555833 | x |
| x H | 128 | -1.077355 | -0.068216 | -0.604668 | x |
| x H | 129 | -1.392200 | 0.136563  | -0.631908 | x |
| x H | 130 | -1.397751 | 0.072012  | -0.581056 | x |
| x H | 131 | -0.284371 | -0.228888 | -0.248990 | x |
| x H | 132 | -0.304138 | -0.126175 | -0.254138 | x |
| x H | 133 | -0.217828 | -0.241873 | -0.281140 | x |

|     |     |           |           |           |   |
|-----|-----|-----------|-----------|-----------|---|
| x H | 134 | -0.374738 | -0.129494 | -0.324405 | x |
| x H | 135 | -0.349109 | -0.294413 | -0.307322 | x |
| x H | 136 | -0.536421 | -0.186436 | -0.319774 | x |
| x H | 137 | -0.626404 | -0.009797 | -0.305870 | x |
| x H | 138 | -0.567825 | -0.020574 | -0.340787 | x |
| x H | 139 | -0.482711 | -0.024606 | -0.272423 | x |
| x H | 140 | -0.469289 | -0.120883 | -0.264430 | x |
| x H | 141 | -0.196041 | -0.364882 | -0.323503 | x |
| x H | 142 | -0.253555 | -0.282631 | -0.358056 | x |
| x H | 143 | -0.176819 | -0.445980 | -0.392644 | x |
| x H | 144 | -0.240481 | -0.456741 | -0.369948 | x |
| x H | 145 | -0.355701 | -0.393533 | -0.480184 | x |
| x H | 146 | -0.253097 | -0.500558 | -0.455855 | x |
| x H | 147 | -0.243243 | -0.418641 | -0.462269 | x |
| x H | 148 | -0.439757 | -0.137227 | -0.381559 | x |
| x H | 149 | -0.606735 | -0.198972 | -0.387021 | x |
| x H | 150 | -0.755096 | 0.019475  | -0.353816 | x |
| x H | 151 | -0.720057 | -0.075665 | -0.331986 | x |
| x H | 152 | -0.778790 | -0.056459 | -0.382174 | x |
| x H | 153 | -0.881659 | 0.327514  | -0.373788 | x |
| x H | 154 | -0.822547 | 0.213177  | -0.359581 | x |
| x H | 155 | -0.753144 | 0.246165  | -0.355479 | x |
| x H | 156 | -0.909786 | 0.536246  | -0.308043 | x |
| x H | 157 | -0.993994 | 0.517986  | -0.320069 | x |
| x H | 158 | -0.905792 | 0.461110  | -0.353198 | x |
| x H | 159 | -0.694480 | 0.221001  | -0.283059 | x |
| x H | 160 | -0.761790 | 0.187160  | -0.284926 | x |
| x H | 161 | -0.782156 | 0.285009  | -0.248903 | x |
| x H | 162 | -0.963313 | 0.401440  | -0.272988 | x |
| x H | 163 | -0.943352 | 0.301214  | -0.306538 | x |
| x H | 164 | -1.006755 | 0.412555  | -0.324936 | x |
| x C | 1   | -1.233388 | 1.538874  | -0.116553 | x |
| x C | 2   | -1.167810 | 1.505204  | -0.082075 | x |
| x C | 3   | -1.196015 | 1.568023  | -0.046168 | x |
| x C | 4   | -1.290113 | 1.662232  | -0.046261 | x |
| x C | 5   | -1.352144 | 1.690297  | -0.081999 | x |
| x C | 6   | -0.737851 | 1.164611  | 0.052891  | x |
| x C | 7   | -0.817233 | 1.265530  | 0.054341  | x |
| x C | 8   | -0.892991 | 1.302561  | 0.022338  | x |
| x C | 9   | -0.884253 | 1.235840  | -0.010353 | x |
| x C | 10  | -0.802848 | 1.136223  | -0.009755 | x |
| x C | 11  | -1.171130 | 1.809081  | 0.115776  | x |
| x C | 12  | -1.161368 | 1.740702  | 0.084454  | x |
| x C | 13  | -1.073683 | 1.641842  | 0.084224  | x |
| x C | 14  | -0.999316 | 1.615634  | 0.116099  | x |
| x C | 15  | -1.014647 | 1.688112  | 0.146739  | x |



|     |    |           |          |           |   |
|-----|----|-----------|----------|-----------|---|
| x C | 16 | -1.124583 | 1.534556 | -0.009607 | x |
| x C | 17 | -0.980017 | 1.409455 | 0.022391  | x |
| x C | 18 | -1.062485 | 1.568258 | 0.050851  | x |
| x C | 19 | -0.717170 | 0.939972 | 0.065826  | x |
| x C | 20 | -0.729500 | 0.913510 | 0.094508  | x |
| x C | 21 | -0.648430 | 0.851830 | 0.121728  | x |
| x C | 22 | -0.558301 | 0.820219 | 0.119134  | x |
| x C | 23 | -0.551730 | 0.849962 | 0.089875  | x |
| x C | 24 | -0.923073 | 0.839894 | 0.219691  | x |
| x C | 25 | -0.839914 | 0.820206 | 0.216866  | x |
| x C | 26 | -0.826921 | 0.822828 | 0.180465  | x |
| x C | 27 | -0.899181 | 0.846348 | 0.147816  | x |
| x C | 28 | -0.980153 | 0.864477 | 0.152796  | x |
| x C | 29 | -0.346685 | 0.629861 | 0.275159  | x |
| x C | 30 | -0.427123 | 0.687057 | 0.247308  | x |
| x C | 31 | -0.494009 | 0.674140 | 0.234928  | x |
| x C | 32 | -0.478416 | 0.605223 | 0.251454  | x |
| x C | 33 | -0.394568 | 0.548234 | 0.277935  | x |
| x C | 34 | -0.654865 | 0.817199 | 0.152014  | x |
| x C | 35 | -0.736891 | 0.800083 | 0.178085  | x |
| x C | 36 | -0.580724 | 0.732303 | 0.205192  | x |
| x C | 37 | -0.347499 | 0.644901 | 0.384383  | x |
| x C | 38 | -0.380545 | 0.709957 | 0.419114  | x |
| x C | 39 | -0.314856 | 0.684160 | 0.454299  | x |
| x C | 40 | -0.219011 | 0.591966 | 0.453568  | x |
| x C | 41 | -0.191720 | 0.530057 | 0.417794  | x |
| x C | 42 | -0.711290 | 1.138357 | 0.557559  | x |
| x C | 43 | -0.610535 | 1.059402 | 0.558650  | x |
| x C | 44 | -0.574381 | 0.987861 | 0.525235  | x |
| x C | 45 | -0.641158 | 1.000158 | 0.491766  | x |
| x C | 46 | -0.740726 | 1.079999 | 0.493135  | x |
| x C | 47 | -0.066275 | 0.699717 | 0.615969  | x |
| x C | 48 | -0.135837 | 0.710367 | 0.584994  | x |
| x C | 49 | -0.233996 | 0.799243 | 0.584795  | x |
| x C | 50 | -0.258634 | 0.874033 | 0.616346  | x |
| x C | 51 | -0.184942 | 0.858453 | 0.646222  | x |
| x C | 52 | -0.346504 | 0.755193 | 0.491035  | x |
| x C | 53 | -0.468577 | 0.899715 | 0.524358  | x |
| x C | 54 | -0.308844 | 0.812718 | 0.551701  | x |
| x C | 55 | -0.036887 | 0.951619 | 0.722390  | x |
| x C | 56 | -0.056708 | 1.036102 | 0.721564  | x |
| x C | 57 | -0.056186 | 1.052981 | 0.685640  | x |
| x C | 58 | -0.035785 | 0.984240 | 0.651860  | x |
| x C | 59 | -0.018066 | 0.902251 | 0.654787  | x |
| x C | 60 | -0.280083 | 1.552611 | 0.766072  | x |
| x C | 61 | -0.223011 | 1.470733 | 0.738860  | x |

|     |     |           |          |           |   |
|-----|-----|-----------|----------|-----------|---|
| x C | 62  | -0.216749 | 1.391889 | 0.735093  | x |
| x C | 63  | -0.269288 | 1.398599 | 0.758688  | x |
| x C | 64  | -0.326400 | 1.483744 | 0.784733  | x |
| x C | 65  | 0.067871  | 1.157932 | 0.572265  | x |
| x C | 66  | 0.035021  | 1.149192 | 0.599567  | x |
| x C | 67  | -0.039025 | 1.233836 | 0.621803  | x |
| x C | 68  | -0.078879 | 1.325032 | 0.615086  | x |
| x C | 69  | -0.044120 | 1.328433 | 0.586853  | x |
| x C | 70  | -0.080157 | 1.143701 | 0.683155  | x |
| x C | 71  | -0.154794 | 1.302802 | 0.707032  | x |
| x C | 72  | -0.073012 | 1.228352 | 0.652762  | x |
| x C | 73  | 0.192815  | 0.289524 | 0.270323  | x |
| x C | 74  | 0.165049  | 0.372829 | 0.303840  | x |
| x C | 75  | 0.256232  | 0.354906 | 0.327973  | x |
| x C | 76  | 0.228005  | 0.443909 | 0.359281  | x |
| x C | 77  | 0.151357  | 0.541814 | 0.341782  | x |
| x C | 78  | 0.060484  | 0.557934 | 0.319608  | x |
| x C | 79  | 0.090033  | 0.471704 | 0.287398  | x |
| x C | 80  | 0.326833  | 0.258838 | 0.346872  | x |
| x C | 81  | 0.404587  | 0.245914 | 0.380847  | x |
| x C | 82  | 0.363776  | 0.328809 | 0.416291  | x |
| x C | 83  | 0.423106  | 0.293276 | 0.456367  | x |
| x C | 84  | 0.190962  | 0.448292 | 0.393888  | x |
| x C | 85  | 0.095845  | 0.628860 | 0.410133  | x |
| x C | 86  | 0.128220  | 0.625583 | 0.374826  | x |
| x C | 87  | 0.055978  | 0.725796 | 0.359795  | x |
| x C | 88  | -0.322721 | 0.847571 | 0.309259  | x |
| x C | 89  | -0.274828 | 0.825197 | 0.352216  | x |
| x C | 90  | -0.482536 | 0.917994 | 0.321521  | x |
| x C | 91  | -0.249579 | 0.766300 | 0.279671  | x |
| x C | 92  | -0.362187 | 0.946521 | 0.303281  | x |
| x C | 93  | -1.538874 | 1.233388 | 0.116553  | x |
| x C | 94  | -1.505204 | 1.167810 | 0.082075  | x |
| x C | 95  | -1.568023 | 1.196015 | 0.046168  | x |
| x C | 96  | -1.662232 | 1.290113 | 0.046261  | x |
| x C | 97  | -1.690297 | 1.352144 | 0.081999  | x |
| x C | 98  | -1.164611 | 0.737851 | -0.052891 | x |
| x C | 99  | -1.265530 | 0.817233 | -0.054341 | x |
| x C | 100 | -1.302561 | 0.892991 | -0.022338 | x |
| x C | 101 | -1.235840 | 0.884253 | 0.010353  | x |
| x C | 102 | -1.136223 | 0.802848 | 0.009755  | x |
| x C | 103 | -1.809081 | 1.171130 | -0.115776 | x |
| x C | 104 | -1.740702 | 1.161368 | -0.084454 | x |
| x C | 105 | -1.641842 | 1.073683 | -0.084224 | x |
| x C | 106 | -1.615634 | 0.999316 | -0.116099 | x |
| x C | 107 | -1.688112 | 1.014647 | -0.146739 | x |

|     |     |           |          |           |   |
|-----|-----|-----------|----------|-----------|---|
| x C | 108 | -1.534556 | 1.124583 | 0.009607  | x |
| x C | 109 | -1.409455 | 0.980017 | -0.022391 | x |
| x C | 110 | -1.568258 | 1.062485 | -0.050851 | x |
| x C | 111 | -0.939972 | 0.717170 | -0.065826 | x |
| x C | 112 | -0.913510 | 0.729500 | -0.094508 | x |
| x C | 113 | -0.851830 | 0.648430 | -0.121728 | x |
| x C | 114 | -0.820219 | 0.558301 | -0.119134 | x |
| x C | 115 | -0.849962 | 0.551730 | -0.089875 | x |
| x C | 116 | -0.839894 | 0.923073 | -0.219691 | x |
| x C | 117 | -0.820206 | 0.839914 | -0.216866 | x |
| x C | 118 | -0.822828 | 0.826921 | -0.180465 | x |
| x C | 119 | -0.846348 | 0.899181 | -0.147816 | x |
| x C | 120 | -0.864477 | 0.980153 | -0.152796 | x |
| x C | 121 | -0.629861 | 0.346685 | -0.275159 | x |
| x C | 122 | -0.687057 | 0.427123 | -0.247308 | x |
| x C | 123 | -0.674140 | 0.494009 | -0.234928 | x |
| x C | 124 | -0.605223 | 0.478416 | -0.251454 | x |
| x C | 125 | -0.548234 | 0.394568 | -0.277935 | x |
| x C | 126 | -0.817199 | 0.654865 | -0.152014 | x |
| x C | 127 | -0.800083 | 0.736891 | -0.178085 | x |
| x C | 128 | -0.732303 | 0.580724 | -0.205192 | x |
| x C | 129 | -0.644901 | 0.347499 | -0.384383 | x |
| x C | 130 | -0.709957 | 0.380545 | -0.419114 | x |
| x C | 131 | -0.684160 | 0.314856 | -0.454299 | x |
| x C | 132 | -0.591966 | 0.219011 | -0.453568 | x |
| x C | 133 | -0.530057 | 0.191720 | -0.417794 | x |
| x C | 134 | -1.138357 | 0.711290 | -0.557559 | x |
| x C | 135 | -1.059402 | 0.610535 | -0.558650 | x |
| x C | 136 | -0.987861 | 0.574381 | -0.525235 | x |
| x C | 137 | -1.000158 | 0.641158 | -0.491766 | x |
| x C | 138 | -1.079999 | 0.740726 | -0.493135 | x |
| x C | 139 | -0.699717 | 0.066275 | -0.615969 | x |
| x C | 140 | -0.710367 | 0.135837 | -0.584994 | x |
| x C | 141 | -0.799243 | 0.233996 | -0.584795 | x |
| x C | 142 | -0.874033 | 0.258634 | -0.616346 | x |
| x C | 143 | -0.858453 | 0.184942 | -0.646222 | x |
| x C | 144 | -0.755193 | 0.346504 | -0.491035 | x |
| x C | 145 | -0.899715 | 0.468577 | -0.524358 | x |
| x C | 146 | -0.812718 | 0.308844 | -0.551701 | x |
| x C | 147 | -0.951619 | 0.036887 | -0.722390 | x |
| x C | 148 | -1.036102 | 0.056708 | -0.721564 | x |
| x C | 149 | -1.052981 | 0.056186 | -0.685640 | x |
| x C | 150 | -0.984240 | 0.035785 | -0.651860 | x |
| x C | 151 | -0.902251 | 0.018066 | -0.654787 | x |
| x C | 152 | -1.552611 | 0.280083 | -0.766072 | x |
| x C | 153 | -1.470733 | 0.223011 | -0.738860 | x |

|     |     |           |           |           |   |
|-----|-----|-----------|-----------|-----------|---|
| x C | 154 | -1.391889 | 0.216749  | -0.735093 | x |
| x C | 155 | -1.398599 | 0.269288  | -0.758688 | x |
| x C | 156 | -1.483744 | 0.326400  | -0.784733 | x |
| x C | 157 | -1.157932 | -0.067871 | -0.572265 | x |
| x C | 158 | -1.149192 | -0.035021 | -0.599567 | x |
| x C | 159 | -1.233836 | 0.039025  | -0.621803 | x |
| x C | 160 | -1.325032 | 0.078879  | -0.615086 | x |
| x C | 161 | -1.328433 | 0.044120  | -0.586853 | x |
| x C | 162 | -1.143701 | 0.080157  | -0.683155 | x |
| x C | 163 | -1.302802 | 0.154794  | -0.707032 | x |
| x C | 164 | -1.228352 | 0.073012  | -0.652762 | x |
| x C | 165 | -0.289524 | -0.192815 | -0.270323 | x |
| x C | 166 | -0.372829 | -0.165049 | -0.303840 | x |
| x C | 167 | -0.354906 | -0.256232 | -0.327973 | x |
| x C | 168 | -0.443909 | -0.228005 | -0.359281 | x |
| x C | 169 | -0.541814 | -0.151357 | -0.341782 | x |
| x C | 170 | -0.557934 | -0.060484 | -0.319608 | x |
| x C | 171 | -0.471704 | -0.090033 | -0.287398 | x |
| x C | 172 | -0.258838 | -0.326833 | -0.346872 | x |
| x C | 173 | -0.245914 | -0.404587 | -0.380847 | x |
| x C | 174 | -0.328809 | -0.363776 | -0.416291 | x |
| x C | 175 | -0.293276 | -0.423106 | -0.456367 | x |
| x C | 176 | -0.448292 | -0.190962 | -0.393888 | x |
| x C | 177 | -0.628860 | -0.095845 | -0.410133 | x |
| x C | 178 | -0.625583 | -0.128220 | -0.374826 | x |
| x C | 179 | -0.725796 | -0.055978 | -0.359795 | x |
| x C | 180 | -0.847571 | 0.322721  | -0.309259 | x |
| x C | 181 | -0.825197 | 0.274828  | -0.352216 | x |
| x C | 182 | -0.917994 | 0.482536  | -0.321521 | x |
| x C | 183 | -0.766300 | 0.249579  | -0.279671 | x |
| x C | 184 | -0.946521 | 0.362187  | -0.303281 | x |
| x N | 1   | -1.324024 | 1.630005  | -0.116861 | x |
| x N | 2   | -0.730650 | 1.100100  | 0.021497  | x |
| x N | 3   | -1.098791 | 1.783853  | 0.146522  | x |
| x N | 4   | -1.051058 | 1.436714  | -0.008801 | x |
| x N | 5   | -0.981873 | 1.472010  | 0.052977  | x |
| x N | 6   | -1.134653 | 1.603210  | 0.019615  | x |
| x N | 7   | -0.629792 | 0.909196  | 0.063403  | x |
| x N | 8   | -0.992329 | 0.861370  | 0.188051  | x |
| x N | 9   | -0.329239 | 0.560094  | 0.289713  | x |
| x N | 10  | -0.737574 | 0.835026  | 0.149654  | x |
| x N | 11  | -0.659430 | 0.745774  | 0.205501  | x |
| x N | 12  | -0.575533 | 0.768264  | 0.179488  | x |
| x N | 13  | -0.254493 | 0.556519  | 0.383486  | x |
| x N | 14  | -0.776102 | 1.148347  | 0.525596  | x |
| x N | 15  | -0.089719 | 0.772985  | 0.646053  | x |

|      |    |           |           |           |   |
|------|----|-----------|-----------|-----------|---|
| x N  | 16 | -0.443561 | 0.830631  | 0.492514  | x |
| x N  | 17 | -0.404067 | 0.894694  | 0.554723  | x |
| x N  | 18 | -0.276025 | 0.741819  | 0.520123  | x |
| x N  | 19 | -0.017694 | 0.885438  | 0.689641  | x |
| x N  | 20 | -0.331062 | 1.559236  | 0.788827  | x |
| x N  | 21 | 0.028981  | 1.246348  | 0.565882  | x |
| x N  | 22 | -0.132670 | 1.221092  | 0.710891  | x |
| x N  | 23 | -0.125707 | 1.309855  | 0.678908  | x |
| x N  | 24 | -0.049957 | 1.143963  | 0.652984  | x |
| x N  | 25 | -1.630005 | 1.324024  | 0.116861  | x |
| x N  | 26 | -1.100100 | 0.730650  | -0.021497 | x |
| x N  | 27 | -1.783853 | 1.098791  | -0.146522 | x |
| x N  | 28 | -1.436714 | 1.051058  | 0.008801  | x |
| x N  | 29 | -1.472010 | 0.981873  | -0.052977 | x |
| x N  | 30 | -1.603210 | 1.134653  | -0.019615 | x |
| x N  | 31 | -0.909196 | 0.629792  | -0.063403 | x |
| x N  | 32 | -0.861370 | 0.992329  | -0.188051 | x |
| x N  | 33 | -0.560094 | 0.329239  | -0.289713 | x |
| x N  | 34 | -0.835026 | 0.737574  | -0.149654 | x |
| x N  | 35 | -0.745774 | 0.659430  | -0.205501 | x |
| x N  | 36 | -0.768264 | 0.575533  | -0.179488 | x |
| x N  | 37 | -0.556519 | 0.254493  | -0.383486 | x |
| x N  | 38 | -1.148347 | 0.776102  | -0.525596 | x |
| x N  | 39 | -0.772985 | 0.089719  | -0.646053 | x |
| x N  | 40 | -0.830631 | 0.443561  | -0.492514 | x |
| x N  | 41 | -0.894694 | 0.404067  | -0.554723 | x |
| x N  | 42 | -0.741819 | 0.276025  | -0.520123 | x |
| x N  | 43 | -0.885438 | 0.017694  | -0.689641 | x |
| x N  | 44 | -1.559236 | 0.331062  | -0.788827 | x |
| x N  | 45 | -1.246348 | -0.028981 | -0.565882 | x |
| x N  | 46 | -1.221092 | 0.132670  | -0.710891 | x |
| x N  | 47 | -1.309855 | 0.125707  | -0.678908 | x |
| x N  | 48 | -1.143963 | 0.049957  | -0.652984 | x |
| x O  | 1  | 0.316317  | 0.430117  | 0.371918  | x |
| x O  | 2  | 0.359914  | 0.403404  | 0.413223  | x |
| x O  | 3  | 0.264463  | 0.374577  | 0.418778  | x |
| x O  | 4  | 0.136527  | 0.542024  | 0.419846  | x |
| x O  | 5  | 0.038259  | 0.704326  | 0.431798  | x |
| x O  | 6  | -0.401369 | 0.846294  | 0.298775  | x |
| x O  | 7  | -0.430117 | -0.316317 | -0.371918 | x |
| x O  | 8  | -0.403404 | -0.359914 | -0.413223 | x |
| x O  | 9  | -0.374577 | -0.264463 | -0.418778 | x |
| x O  | 10 | -0.542024 | -0.136527 | -0.419846 | x |
| x O  | 11 | -0.704326 | -0.038259 | -0.431798 | x |
| x O  | 12 | -0.846294 | 0.401369  | -0.298775 | x |
| x Zn | 1  | -1.414409 | 1.682609  | -0.170171 | x |

|      |    |           |           |           |   |
|------|----|-----------|-----------|-----------|---|
| x Zn | 2  | -0.611559 | 0.948358  | 0.018711  | x |
| x Zn | 3  | -1.117849 | 0.892718  | 0.191888  | x |
| x Zn | 4  | -0.203769 | 0.470807  | 0.329665  | x |
| x Zn | 5  | -0.926341 | 1.262934  | 0.523326  | x |
| x Zn | 6  | 0.018153  | 0.755956  | 0.691468  | x |
| x Zn | 7  | -1.682609 | 1.414409  | 0.170171  | x |
| x Zn | 8  | -0.948358 | 0.611559  | -0.018711 | x |
| x Zn | 9  | -0.892718 | 1.117849  | -0.191888 | x |
| x Zn | 10 | -0.470807 | 0.203769  | -0.329665 | x |
| x Zn | 11 | -1.262934 | 0.926341  | -0.523326 | x |
| x Zn | 12 | -0.755956 | -0.018153 | -0.691468 | x |
| x I  | 1  | -1.405650 | 1.806028  | -0.178533 | x |
| x I  | 2  | -1.574289 | 1.725821  | -0.172462 | x |
| x I  | 3  | -0.627978 | 0.872061  | -0.052355 | x |
| x I  | 4  | -0.447716 | 0.907708  | 0.047410  | x |
| x I  | 5  | -1.263106 | 1.059224  | 0.164932  | x |
| x I  | 6  | -1.107356 | 0.858735  | 0.258917  | x |
| x I  | 7  | -0.152071 | 0.304002  | 0.321205  | x |
| x I  | 8  | -0.085832 | 0.491165  | 0.324457  | x |
| x I  | 9  | -1.007503 | 1.248172  | 0.452529  | x |
| x I  | 10 | -0.970541 | 1.429820  | 0.547783  | x |
| x I  | 11 | -0.018904 | 0.770077  | 0.758830  | x |
| x I  | 12 | 0.185772  | 0.608596  | 0.666113  | x |
| x I  | 13 | -1.806028 | 1.405650  | 0.178533  | x |
| x I  | 14 | -1.725821 | 1.574289  | 0.172462  | x |
| x I  | 15 | -0.872061 | 0.627978  | 0.052355  | x |
| x I  | 16 | -0.907708 | 0.447716  | -0.047410 | x |
| x I  | 17 | -1.059224 | 1.263106  | -0.164932 | x |
| x I  | 18 | -0.858735 | 1.107356  | -0.258917 | x |
| x I  | 19 | -0.304002 | 0.152071  | -0.321205 | x |
| x I  | 20 | -0.491165 | 0.085832  | -0.324457 | x |
| x I  | 21 | -1.248172 | 1.007503  | -0.452529 | x |
| x I  | 22 | -1.429820 | 0.970541  | -0.547783 | x |
| x I  | 23 | -0.770077 | 0.018904  | -0.758830 | x |
| x I  | 24 | -0.608596 | -0.185772 | -0.666113 | x |

**Table S6.** Fractional atomic coordinates of the optimised structure of 4-(trifluoromethyl)phenyl azide@**1a**

| x | Element | Atom   | Fractional coordinates of atoms |          |          | x |
|---|---------|--------|---------------------------------|----------|----------|---|
| x |         | Number | u                               | v        | w        | x |
| x | H       | 1      | 0.168324                        | 1.519516 | 0.834785 | x |
| x | H       | 2      | 0.207308                        | 1.398528 | 0.770671 | x |
| x | H       | 3      | 0.512098                        | 1.215168 | 0.818142 | x |
| x | H       | 4      | 0.462365                        | 1.344127 | 0.878669 | x |
| x | H       | 5      | 0.239637                        | 1.087861 | 0.562492 | x |
| x | H       | 6      | 0.374698                        | 1.059498 | 0.613217 | x |
| x | H       | 7      | 0.157121                        | 1.297290 | 0.700784 | x |
| x | H       | 8      | 0.030375                        | 1.313541 | 0.647591 | x |
| x | H       | 9      | 0.840363                        | 0.893650 | 0.762023 | x |
| x | H       | 10     | 0.664266                        | 1.052662 | 0.757274 | x |
| x | H       | 11     | 0.597095                        | 0.897051 | 0.672814 | x |
| x | H       | 12     | 0.775850                        | 0.743765 | 0.680583 | x |
| x | H       | 13     | 0.046266                        | 1.111360 | 0.621334 | x |
| x | H       | 14     | 0.090968                        | 0.953802 | 0.625142 | x |
| x | H       | 15     | 0.148370                        | 0.883463 | 0.488343 | x |
| x | H       | 16     | 0.097440                        | 1.046207 | 0.489153 | x |
| x | H       | 17     | 0.096644                        | 0.555260 | 0.653237 | x |
| x | H       | 18     | 0.171158                        | 0.563481 | 0.598168 | x |
| x | H       | 19     | 0.025962                        | 0.856047 | 0.654392 | x |
| x | H       | 20     | -0.039043                       | 0.834947 | 0.708931 | x |
| x | H       | 21     | 0.481123                        | 0.485415 | 0.435895 | x |
| x | H       | 22     | 0.354806                        | 0.636502 | 0.484365 | x |
| x | H       | 23     | 0.292554                        | 0.479085 | 0.520746 | x |
| x | H       | 24     | 0.421562                        | 0.335060 | 0.471981 | x |
| x | H       | 25     | 0.194702                        | 0.381154 | 0.618378 | x |
| x | H       | 26     | 0.283046                        | 0.390930 | 0.632922 | x |
| x | H       | 27     | 0.320513                        | 0.274374 | 0.626792 | x |
| x | H       | 28     | 0.198753                        | 0.294591 | 0.542167 | x |
| x | H       | 29     | 0.327680                        | 0.194440 | 0.548921 | x |
| x | H       | 30     | 0.274688                        | 0.265077 | 0.502865 | x |
| x | H       | 31     | 0.395961                        | 0.282439 | 0.525049 | x |
| x | H       | 32     | 0.441074                        | 0.223168 | 0.574566 | x |
| x | H       | 33     | 0.391056                        | 0.344715 | 0.577137 | x |
| x | H       | 34     | 0.106327                        | 0.441545 | 0.509301 | x |
| x | H       | 35     | 0.073759                        | 0.553131 | 0.533070 | x |
| x | H       | 36     | 0.088465                        | 0.476415 | 0.566918 | x |
| x | H       | 37     | 0.102497                        | 1.347319 | 0.414846 | x |
| x | H       | 38     | 0.185281                        | 1.177120 | 0.421467 | x |
| x | H       | 39     | 0.465726                        | 1.083699 | 0.422844 | x |

|     |    |           |           |           |   |
|-----|----|-----------|-----------|-----------|---|
| x H | 40 | 0.384081  | 1.253131  | 0.416777  | x |
| x H | 41 | -1.519516 | -0.168324 | -0.334785 | x |
| x H | 42 | -1.398528 | -0.207308 | -0.270671 | x |
| x H | 43 | -1.215168 | -0.512098 | -0.318142 | x |
| x H | 44 | -1.344127 | -0.462365 | -0.378669 | x |
| x H | 45 | -1.087861 | -0.239637 | -0.062492 | x |
| x H | 46 | -1.059498 | -0.374698 | -0.113217 | x |
| x H | 47 | -1.297290 | -0.157121 | -0.200784 | x |
| x H | 48 | -1.313541 | -0.030375 | -0.147591 | x |
| x H | 49 | -0.893650 | -0.840363 | -0.262023 | x |
| x H | 50 | -1.052662 | -0.664266 | -0.257274 | x |
| x H | 51 | -0.897051 | -0.597095 | -0.172814 | x |
| x H | 52 | -0.743765 | -0.775850 | -0.180583 | x |
| x H | 53 | -1.111360 | -0.046266 | -0.121334 | x |
| x H | 54 | -0.953802 | -0.090968 | -0.125142 | x |
| x H | 55 | -0.883463 | -0.148370 | 0.011657  | x |
| x H | 56 | -1.046207 | -0.097440 | 0.010847  | x |
| x H | 57 | -0.555260 | -0.096644 | -0.153237 | x |
| x H | 58 | -0.563481 | -0.171158 | -0.098168 | x |
| x H | 59 | -0.856047 | -0.025962 | -0.154392 | x |
| x H | 60 | -0.834947 | 0.039043  | -0.208931 | x |
| x H | 61 | -0.485415 | -0.481123 | 0.064105  | x |
| x H | 62 | -0.636502 | -0.354806 | 0.015635  | x |
| x H | 63 | -0.479085 | -0.292554 | -0.020746 | x |
| x H | 64 | -0.335060 | -0.421562 | 0.028019  | x |
| x H | 65 | -0.381154 | -0.194702 | -0.118378 | x |
| x H | 66 | -0.390930 | -0.283046 | -0.132922 | x |
| x H | 67 | -0.274374 | -0.320513 | -0.126792 | x |
| x H | 68 | -0.294591 | -0.198753 | -0.042167 | x |
| x H | 69 | -0.194440 | -0.327680 | -0.048921 | x |
| x H | 70 | -0.265077 | -0.274688 | -0.002865 | x |
| x H | 71 | -0.282439 | -0.395961 | -0.025049 | x |
| x H | 72 | -0.223168 | -0.441074 | -0.074566 | x |
| x H | 73 | -0.344715 | -0.391056 | -0.077137 | x |
| x H | 74 | -0.441545 | -0.106327 | -0.009301 | x |
| x H | 75 | -0.553131 | -0.073759 | -0.033070 | x |
| x H | 76 | -0.476415 | -0.088465 | -0.066918 | x |
| x H | 77 | -1.347319 | -0.102497 | 0.085154  | x |
| x H | 78 | -1.177120 | -0.185281 | 0.078533  | x |
| x H | 79 | -1.083699 | -0.465726 | 0.077156  | x |
| x H | 80 | -1.253131 | -0.384081 | 0.083223  | x |
| x H | 81 | -0.168324 | -1.519516 | -0.834785 | x |
| x H | 82 | -0.207308 | -1.398528 | -0.770671 | x |
| x H | 83 | -0.512098 | -1.215168 | -0.818142 | x |
| x H | 84 | -0.462365 | -1.344127 | -0.878669 | x |
| x H | 85 | -0.239637 | -1.087861 | -0.562492 | x |



|     |     |           |           |           |   |
|-----|-----|-----------|-----------|-----------|---|
| x H | 86  | -0.374698 | -1.059498 | -0.613217 | x |
| x H | 87  | -0.157121 | -1.297290 | -0.700784 | x |
| x H | 88  | -0.030375 | -1.313541 | -0.647591 | x |
| x H | 89  | -0.840363 | -0.893650 | -0.762023 | x |
| x H | 90  | -0.664266 | -1.052662 | -0.757274 | x |
| x H | 91  | -0.597095 | -0.897051 | -0.672814 | x |
| x H | 92  | -0.775850 | -0.743765 | -0.680583 | x |
| x H | 93  | -0.046266 | -1.111360 | -0.621334 | x |
| x H | 94  | -0.090968 | -0.953802 | -0.625142 | x |
| x H | 95  | -0.148370 | -0.883463 | -0.488343 | x |
| x H | 96  | -0.097440 | -1.046207 | -0.489153 | x |
| x H | 97  | -0.096644 | -0.555260 | -0.653237 | x |
| x H | 98  | -0.171158 | -0.563481 | -0.598168 | x |
| x H | 99  | -0.025962 | -0.856047 | -0.654392 | x |
| x H | 100 | 0.039043  | -0.834947 | -0.708931 | x |
| x H | 101 | -0.481123 | -0.485415 | -0.435895 | x |
| x H | 102 | -0.354806 | -0.636502 | -0.484365 | x |
| x H | 103 | -0.292554 | -0.479085 | -0.520746 | x |
| x H | 104 | -0.421562 | -0.335060 | -0.471981 | x |
| x H | 105 | -0.194702 | -0.381154 | -0.618378 | x |
| x H | 106 | -0.283046 | -0.390930 | -0.632922 | x |
| x H | 107 | -0.320513 | -0.274374 | -0.626792 | x |
| x H | 108 | -0.198753 | -0.294591 | -0.542167 | x |
| x H | 109 | -0.327680 | -0.194440 | -0.548921 | x |
| x H | 110 | -0.274688 | -0.265077 | -0.502865 | x |
| x H | 111 | -0.395961 | -0.282439 | -0.525049 | x |
| x H | 112 | -0.441074 | -0.223168 | -0.574566 | x |
| x H | 113 | -0.391056 | -0.344715 | -0.577137 | x |
| x H | 114 | -0.106327 | -0.441545 | -0.509301 | x |
| x H | 115 | -0.073759 | -0.553131 | -0.533070 | x |
| x H | 116 | -0.088465 | -0.476415 | -0.566918 | x |
| x H | 117 | -0.102497 | -1.347319 | -0.414846 | x |
| x H | 118 | -0.185281 | -1.177120 | -0.421467 | x |
| x H | 119 | -0.465726 | -1.083699 | -0.422844 | x |
| x H | 120 | -0.384081 | -1.253131 | -0.416777 | x |
| x H | 121 | 1.519516  | 0.168324  | 1.334785  | x |
| x H | 122 | 1.398528  | 0.207308  | 1.270671  | x |
| x H | 123 | 1.215168  | 0.512098  | 1.318142  | x |
| x H | 124 | 1.344127  | 0.462365  | 1.378669  | x |
| x H | 125 | 1.087861  | 0.239637  | 1.062492  | x |
| x H | 126 | 1.059498  | 0.374698  | 1.113217  | x |
| x H | 127 | 1.297290  | 0.157121  | 1.200784  | x |
| x H | 128 | 1.313541  | 0.030375  | 1.147591  | x |
| x H | 129 | 0.893650  | 0.840363  | 1.262023  | x |
| x H | 130 | 1.052662  | 0.664266  | 1.257274  | x |
| x H | 131 | 0.897051  | 0.597095  | 1.172814  | x |

|     |     |          |           |          |   |
|-----|-----|----------|-----------|----------|---|
| x H | 132 | 0.743765 | 0.775850  | 1.180583 | x |
| x H | 133 | 1.111360 | 0.046266  | 1.121334 | x |
| x H | 134 | 0.953802 | 0.090968  | 1.125142 | x |
| x H | 135 | 0.883463 | 0.148370  | 0.988343 | x |
| x H | 136 | 1.046207 | 0.097440  | 0.989153 | x |
| x H | 137 | 0.555260 | 0.096644  | 1.153237 | x |
| x H | 138 | 0.563481 | 0.171158  | 1.098168 | x |
| x H | 139 | 0.856047 | 0.025962  | 1.154392 | x |
| x H | 140 | 0.834947 | -0.039043 | 1.208931 | x |
| x H | 141 | 0.485415 | 0.481123  | 0.935895 | x |
| x H | 142 | 0.636502 | 0.354806  | 0.984365 | x |
| x H | 143 | 0.479085 | 0.292554  | 1.020746 | x |
| x H | 144 | 0.335060 | 0.421562  | 0.971981 | x |
| x H | 145 | 0.381154 | 0.194702  | 1.118378 | x |
| x H | 146 | 0.390930 | 0.283046  | 1.132922 | x |
| x H | 147 | 0.274374 | 0.320513  | 1.126792 | x |
| x H | 148 | 0.294591 | 0.198753  | 1.042167 | x |
| x H | 149 | 0.194440 | 0.327680  | 1.048921 | x |
| x H | 150 | 0.265077 | 0.274688  | 1.002865 | x |
| x H | 151 | 0.282439 | 0.395961  | 1.025049 | x |
| x H | 152 | 0.223168 | 0.441074  | 1.074566 | x |
| x H | 153 | 0.344715 | 0.391056  | 1.077137 | x |
| x H | 154 | 0.441545 | 0.106327  | 1.009301 | x |
| x H | 155 | 0.553131 | 0.073759  | 1.033070 | x |
| x H | 156 | 0.476415 | 0.088465  | 1.066918 | x |
| x H | 157 | 1.347319 | 0.102497  | 0.914846 | x |
| x H | 158 | 1.177120 | 0.185281  | 0.921467 | x |
| x H | 159 | 1.083699 | 0.465726  | 0.922844 | x |
| x H | 160 | 1.253131 | 0.384081  | 0.916777 | x |
| x C | 1   | 0.243502 | 1.451060  | 0.829828 | x |
| x C | 2   | 0.265526 | 1.383547  | 0.794403 | x |
| x C | 3   | 0.363543 | 1.297528  | 0.788958 | x |
| x C | 4   | 0.435428 | 1.282126  | 0.820160 | x |
| x C | 5   | 0.407953 | 1.353499  | 0.854147 | x |
| x C | 6   | 0.224905 | 1.131979  | 0.593671 | x |
| x C | 7   | 0.299268 | 1.116888  | 0.621749 | x |
| x C | 8   | 0.275888 | 1.176186  | 0.661129 | x |
| x C | 9   | 0.177924 | 1.248847  | 0.670735 | x |
| x C | 10  | 0.107698 | 1.258440  | 0.641591 | x |
| x C | 11  | 0.784105 | 0.898814  | 0.741481 | x |
| x C | 12  | 0.686904 | 0.985931  | 0.739200 | x |
| x C | 13  | 0.617316 | 0.987078  | 0.714117 | x |
| x C | 14  | 0.649281 | 0.899317  | 0.692067 | x |
| x C | 15  | 0.747958 | 0.814281  | 0.696355 | x |
| x C | 16  | 0.392373 | 1.223324  | 0.751637 | x |
| x C | 17  | 0.352309 | 1.163706  | 0.691942 | x |

|     |    |           |           |           |   |
|-----|----|-----------|-----------|-----------|---|
| x C | 18 | 0.512156  | 1.078261  | 0.714470  | x |
| x C | 19 | 0.068178  | 1.059069  | 0.592658  | x |
| x C | 20 | 0.091948  | 0.972766  | 0.594407  | x |
| x C | 21 | 0.120278  | 0.908457  | 0.556496  | x |
| x C | 22 | 0.124356  | 0.933384  | 0.518018  | x |
| x C | 23 | 0.096985  | 1.022242  | 0.518306  | x |
| x C | 24 | 0.084105  | 0.620050  | 0.652658  | x |
| x C | 25 | 0.124785  | 0.625174  | 0.622199  | x |
| x C | 26 | 0.103719  | 0.711327  | 0.622473  | x |
| x C | 27 | 0.043557  | 0.788294  | 0.653883  | x |
| x C | 28 | 0.006889  | 0.777124  | 0.683623  | x |
| x C | 29 | 0.436872  | 0.488549  | 0.455287  | x |
| x C | 30 | 0.367698  | 0.570905  | 0.481846  | x |
| x C | 31 | 0.313521  | 0.568992  | 0.505223  | x |
| x C | 32 | 0.332918  | 0.483240  | 0.502525  | x |
| x C | 33 | 0.403096  | 0.403951  | 0.475291  | x |
| x C | 34 | 0.147985  | 0.815007  | 0.557888  | x |
| x C | 35 | 0.143275  | 0.721290  | 0.589985  | x |
| x C | 36 | 0.238428  | 0.655519  | 0.533303  | x |
| x C | 37 | 0.269012  | 0.346724  | 0.613789  | x |
| x C | 38 | 0.269639  | 0.268866  | 0.538143  | x |
| x C | 39 | 0.384155  | 0.293746  | 0.560036  | x |
| x C | 40 | 0.283345  | 0.334677  | 0.564950  | x |
| x C | 41 | 0.116334  | 0.477067  | 0.538917  | x |
| x C | 42 | 0.237792  | 1.311388  | 0.414443  | x |
| x C | 43 | 0.182070  | 1.289282  | 0.415674  | x |
| x C | 44 | 0.228673  | 1.193384  | 0.419165  | x |
| x C | 45 | 0.330650  | 1.118583  | 0.420679  | x |
| x C | 46 | 0.386082  | 1.140834  | 0.420081  | x |
| x C | 47 | 0.340178  | 1.236451  | 0.416869  | x |
| x C | 48 | 0.379361  | 1.014712  | 0.421120  | x |
| x C | 49 | -1.451060 | -0.243502 | -0.329828 | x |
| x C | 50 | -1.383547 | -0.265526 | -0.294403 | x |
| x C | 51 | -1.297528 | -0.363543 | -0.288958 | x |
| x C | 52 | -1.282126 | -0.435428 | -0.320160 | x |
| x C | 53 | -1.353499 | -0.407953 | -0.354147 | x |
| x C | 54 | -1.131979 | -0.224905 | -0.093671 | x |
| x C | 55 | -1.116888 | -0.299268 | -0.121749 | x |
| x C | 56 | -1.176186 | -0.275888 | -0.161129 | x |
| x C | 57 | -1.248847 | -0.177924 | -0.170735 | x |
| x C | 58 | -1.258440 | -0.107698 | -0.141591 | x |
| x C | 59 | -0.898814 | -0.784105 | -0.241481 | x |
| x C | 60 | -0.985931 | -0.686904 | -0.239200 | x |
| x C | 61 | -0.987078 | -0.617316 | -0.214117 | x |
| x C | 62 | -0.899317 | -0.649281 | -0.192067 | x |
| x C | 63 | -0.814281 | -0.747958 | -0.196355 | x |

|     |     |           |           |           |   |
|-----|-----|-----------|-----------|-----------|---|
| x C | 64  | -1.223324 | -0.392373 | -0.251637 | x |
| x C | 65  | -1.163706 | -0.352309 | -0.191942 | x |
| x C | 66  | -1.078261 | -0.512156 | -0.214470 | x |
| x C | 67  | -1.059069 | -0.068178 | -0.092658 | x |
| x C | 68  | -0.972766 | -0.091948 | -0.094407 | x |
| x C | 69  | -0.908457 | -0.120278 | -0.056496 | x |
| x C | 70  | -0.933384 | -0.124356 | -0.018018 | x |
| x C | 71  | -1.022242 | -0.096985 | -0.018306 | x |
| x C | 72  | -0.620050 | -0.084105 | -0.152658 | x |
| x C | 73  | -0.625174 | -0.124785 | -0.122199 | x |
| x C | 74  | -0.711327 | -0.103719 | -0.122473 | x |
| x C | 75  | -0.788294 | -0.043557 | -0.153883 | x |
| x C | 76  | -0.777124 | -0.006889 | -0.183623 | x |
| x C | 77  | -0.488549 | -0.436872 | 0.044713  | x |
| x C | 78  | -0.570905 | -0.367698 | 0.018154  | x |
| x C | 79  | -0.568992 | -0.313521 | -0.005223 | x |
| x C | 80  | -0.483240 | -0.332918 | -0.002525 | x |
| x C | 81  | -0.403951 | -0.403096 | 0.024709  | x |
| x C | 82  | -0.815007 | -0.147985 | -0.057888 | x |
| x C | 83  | -0.721290 | -0.143275 | -0.089985 | x |
| x C | 84  | -0.655519 | -0.238428 | -0.033303 | x |
| x C | 85  | -0.346724 | -0.269012 | -0.113789 | x |
| x C | 86  | -0.268866 | -0.269639 | -0.038143 | x |
| x C | 87  | -0.293746 | -0.384155 | -0.060036 | x |
| x C | 88  | -0.334677 | -0.283345 | -0.064950 | x |
| x C | 89  | -0.477067 | -0.116334 | -0.038917 | x |
| x C | 90  | -1.311388 | -0.237792 | 0.085557  | x |
| x C | 91  | -1.289282 | -0.182070 | 0.084326  | x |
| x C | 92  | -1.193384 | -0.228673 | 0.080835  | x |
| x C | 93  | -1.118583 | -0.330650 | 0.079321  | x |
| x C | 94  | -1.140834 | -0.386082 | 0.079919  | x |
| x C | 95  | -1.236451 | -0.340178 | 0.083131  | x |
| x C | 96  | -1.014712 | -0.379361 | 0.078880  | x |
| x C | 97  | -0.243502 | -1.451060 | -0.829828 | x |
| x C | 98  | -0.265526 | -1.383547 | -0.794403 | x |
| x C | 99  | -0.363543 | -1.297528 | -0.788958 | x |
| x C | 100 | -0.435428 | -1.282126 | -0.820160 | x |
| x C | 101 | -0.407953 | -1.353499 | -0.854147 | x |
| x C | 102 | -0.224905 | -1.131979 | -0.593671 | x |
| x C | 103 | -0.299268 | -1.116888 | -0.621749 | x |
| x C | 104 | -0.275888 | -1.176186 | -0.661129 | x |
| x C | 105 | -0.177924 | -1.248847 | -0.670735 | x |
| x C | 106 | -0.107698 | -1.258440 | -0.641591 | x |
| x C | 107 | -0.784105 | -0.898814 | -0.741481 | x |
| x C | 108 | -0.686904 | -0.985931 | -0.739200 | x |
| x C | 109 | -0.617316 | -0.987078 | -0.714117 | x |

|     |     |           |           |           |   |
|-----|-----|-----------|-----------|-----------|---|
| x C | 110 | -0.649281 | -0.899317 | -0.692067 | x |
| x C | 111 | -0.747958 | -0.814281 | -0.696355 | x |
| x C | 112 | -0.392373 | -1.223324 | -0.751637 | x |
| x C | 113 | -0.352309 | -1.163706 | -0.691942 | x |
| x C | 114 | -0.512156 | -1.078261 | -0.714470 | x |
| x C | 115 | -0.068178 | -1.059069 | -0.592658 | x |
| x C | 116 | -0.091948 | -0.972766 | -0.594407 | x |
| x C | 117 | -0.120278 | -0.908457 | -0.556496 | x |
| x C | 118 | -0.124356 | -0.933384 | -0.518018 | x |
| x C | 119 | -0.096985 | -1.022242 | -0.518306 | x |
| x C | 120 | -0.084105 | -0.620050 | -0.652658 | x |
| x C | 121 | -0.124785 | -0.625174 | -0.622199 | x |
| x C | 122 | -0.103719 | -0.711327 | -0.622473 | x |
| x C | 123 | -0.043557 | -0.788294 | -0.653883 | x |
| x C | 124 | -0.006889 | -0.777124 | -0.683623 | x |
| x C | 125 | -0.436872 | -0.488549 | -0.455287 | x |
| x C | 126 | -0.367698 | -0.570905 | -0.481846 | x |
| x C | 127 | -0.313521 | -0.568992 | -0.505223 | x |
| x C | 128 | -0.332918 | -0.483240 | -0.502525 | x |
| x C | 129 | -0.403096 | -0.403951 | -0.475291 | x |
| x C | 130 | -0.147985 | -0.815007 | -0.557888 | x |
| x C | 131 | -0.143275 | -0.721290 | -0.589985 | x |
| x C | 132 | -0.238428 | -0.655519 | -0.533303 | x |
| x C | 133 | -0.269012 | -0.346724 | -0.613789 | x |
| x C | 134 | -0.269639 | -0.268866 | -0.538143 | x |
| x C | 135 | -0.384155 | -0.293746 | -0.560036 | x |
| x C | 136 | -0.283345 | -0.334677 | -0.564950 | x |
| x C | 137 | -0.116334 | -0.477067 | -0.538917 | x |
| x C | 138 | -0.237792 | -1.311388 | -0.414443 | x |
| x C | 139 | -0.182070 | -1.289282 | -0.415674 | x |
| x C | 140 | -0.228673 | -1.193384 | -0.419165 | x |
| x C | 141 | -0.330650 | -1.118583 | -0.420679 | x |
| x C | 142 | -0.386082 | -1.140834 | -0.420081 | x |
| x C | 143 | -0.340178 | -1.236451 | -0.416869 | x |
| x C | 144 | -0.379361 | -1.014712 | -0.421120 | x |
| x C | 145 | 1.451060  | 0.243502  | 1.329828  | x |
| x C | 146 | 1.383547  | 0.265526  | 1.294403  | x |
| x C | 147 | 1.297528  | 0.363543  | 1.288958  | x |
| x C | 148 | 1.282126  | 0.435428  | 1.320160  | x |
| x C | 149 | 1.353499  | 0.407953  | 1.354147  | x |
| x C | 150 | 1.131979  | 0.224905  | 1.093671  | x |
| x C | 151 | 1.116888  | 0.299268  | 1.121749  | x |
| x C | 152 | 1.176186  | 0.275888  | 1.161129  | x |
| x C | 153 | 1.248847  | 0.177924  | 1.170735  | x |
| x C | 154 | 1.258440  | 0.107698  | 1.141591  | x |
| x C | 155 | 0.898814  | 0.784105  | 1.241481  | x |

|     |     |          |          |          |   |
|-----|-----|----------|----------|----------|---|
| x C | 156 | 0.985931 | 0.686904 | 1.239200 | x |
| x C | 157 | 0.987078 | 0.617316 | 1.214117 | x |
| x C | 158 | 0.899317 | 0.649281 | 1.192067 | x |
| x C | 159 | 0.814281 | 0.747958 | 1.196355 | x |
| x C | 160 | 1.223324 | 0.392373 | 1.251637 | x |
| x C | 161 | 1.163706 | 0.352309 | 1.191942 | x |
| x C | 162 | 1.078261 | 0.512156 | 1.214470 | x |
| x C | 163 | 1.059069 | 0.068178 | 1.092658 | x |
| x C | 164 | 0.972766 | 0.091948 | 1.094407 | x |
| x C | 165 | 0.908457 | 0.120278 | 1.056496 | x |
| x C | 166 | 0.933384 | 0.124356 | 1.018018 | x |
| x C | 167 | 1.022242 | 0.096985 | 1.018306 | x |
| x C | 168 | 0.620050 | 0.084105 | 1.152658 | x |
| x C | 169 | 0.625174 | 0.124785 | 1.122199 | x |
| x C | 170 | 0.711327 | 0.103719 | 1.122473 | x |
| x C | 171 | 0.788294 | 0.043557 | 1.153883 | x |
| x C | 172 | 0.777124 | 0.006889 | 1.183623 | x |
| x C | 173 | 0.488549 | 0.436872 | 0.955287 | x |
| x C | 174 | 0.570905 | 0.367698 | 0.981846 | x |
| x C | 175 | 0.568992 | 0.313521 | 1.005223 | x |
| x C | 176 | 0.483240 | 0.332918 | 1.002525 | x |
| x C | 177 | 0.403951 | 0.403096 | 0.975291 | x |
| x C | 178 | 0.815007 | 0.147985 | 1.057888 | x |
| x C | 179 | 0.721290 | 0.143275 | 1.089985 | x |
| x C | 180 | 0.655519 | 0.238428 | 1.033303 | x |
| x C | 181 | 0.346724 | 0.269012 | 1.113789 | x |
| x C | 182 | 0.268866 | 0.269639 | 1.038143 | x |
| x C | 183 | 0.293746 | 0.384155 | 1.060036 | x |
| x C | 184 | 0.334677 | 0.283345 | 1.064950 | x |
| x C | 185 | 0.477067 | 0.116334 | 1.038917 | x |
| x C | 186 | 1.311388 | 0.237792 | 0.914443 | x |
| x C | 187 | 1.289282 | 0.182070 | 0.915674 | x |
| x C | 188 | 1.193384 | 0.228673 | 0.919165 | x |
| x C | 189 | 1.118583 | 0.330650 | 0.920679 | x |
| x C | 190 | 1.140834 | 0.386082 | 0.920081 | x |
| x C | 191 | 1.236451 | 0.340178 | 0.916869 | x |
| x C | 192 | 1.014712 | 0.379361 | 0.921120 | x |
| x N | 1   | 0.313694 | 1.437292 | 0.859054 | x |
| x N | 2   | 0.130523 | 1.201086 | 0.603452 | x |
| x N | 3   | 0.815021 | 0.813637 | 0.720566 | x |
| x N | 4   | 0.321583 | 1.233120 | 0.725671 | x |
| x N | 5   | 0.447048 | 1.083594 | 0.685254 | x |
| x N | 6   | 0.488585 | 1.148622 | 0.746392 | x |
| x N | 7   | 0.069116 | 1.084551 | 0.555035 | x |
| x N | 8   | 0.025663 | 0.694658 | 0.682955 | x |
| x N | 9   | 0.453671 | 0.406494 | 0.451530 | x |

|     |    |           |           |           |   |
|-----|----|-----------|-----------|-----------|---|
| x N | 10 | 0.113743  | 0.808844  | 0.589700  | x |
| x N | 11 | 0.207838  | 0.641681  | 0.563541  | x |
| x N | 12 | 0.207025  | 0.741930  | 0.527602  | x |
| x N | 13 | 0.025972  | 1.555706  | 0.416925  | x |
| x N | 14 | 0.107807  | 1.479110  | 0.414646  | x |
| x N | 15 | 0.198083  | 1.406168  | 0.411962  | x |
| x N | 16 | -1.437292 | -0.313694 | -0.359054 | x |
| x N | 17 | -1.201086 | -0.130523 | -0.103452 | x |
| x N | 18 | -0.813637 | -0.815021 | -0.220566 | x |
| x N | 19 | -1.233120 | -0.321583 | -0.225671 | x |
| x N | 20 | -1.083594 | -0.447048 | -0.185254 | x |
| x N | 21 | -1.148622 | -0.488585 | -0.246392 | x |
| x N | 22 | -1.084551 | -0.069116 | -0.055035 | x |
| x N | 23 | -0.694658 | -0.025663 | -0.182955 | x |
| x N | 24 | -0.406494 | -0.453671 | 0.048470  | x |
| x N | 25 | -0.808844 | -0.113743 | -0.089700 | x |
| x N | 26 | -0.641681 | -0.207838 | -0.063541 | x |
| x N | 27 | -0.741930 | -0.207025 | -0.027602 | x |
| x N | 28 | -1.555706 | -0.025972 | 0.083075  | x |
| x N | 29 | -1.479110 | -0.107807 | 0.085354  | x |
| x N | 30 | -1.406168 | -0.198083 | 0.088038  | x |
| x N | 31 | -0.313694 | -1.437292 | -0.859054 | x |
| x N | 32 | -0.130523 | -1.201086 | -0.603452 | x |
| x N | 33 | -0.815021 | -0.813637 | -0.720566 | x |
| x N | 34 | -0.321583 | -1.233120 | -0.725671 | x |
| x N | 35 | -0.447048 | -1.083594 | -0.685254 | x |
| x N | 36 | -0.488585 | -1.148622 | -0.746392 | x |
| x N | 37 | -0.069116 | -1.084551 | -0.555035 | x |
| x N | 38 | -0.025663 | -0.694658 | -0.682955 | x |
| x N | 39 | -0.453671 | -0.406494 | -0.451530 | x |
| x N | 40 | -0.113743 | -0.808844 | -0.589700 | x |
| x N | 41 | -0.207838 | -0.641681 | -0.563541 | x |
| x N | 42 | -0.207025 | -0.741930 | -0.527602 | x |
| x N | 43 | -0.025972 | -1.555706 | -0.416925 | x |
| x N | 44 | -0.107807 | -1.479110 | -0.414646 | x |
| x N | 45 | -0.198083 | -1.406168 | -0.411962 | x |
| x N | 46 | 1.437292  | 0.313694  | 1.359054  | x |
| x N | 47 | 1.201086  | 0.130523  | 1.103452  | x |
| x N | 48 | 0.813637  | 0.815021  | 1.220566  | x |
| x N | 49 | 1.233120  | 0.321583  | 1.225671  | x |
| x N | 50 | 1.083594  | 0.447048  | 1.185254  | x |
| x N | 51 | 1.148622  | 0.488585  | 1.246392  | x |
| x N | 52 | 1.084551  | 0.069116  | 1.055035  | x |
| x N | 53 | 0.694658  | 0.025663  | 1.182955  | x |
| x N | 54 | 0.406494  | 0.453671  | 0.951530  | x |
| x N | 55 | 0.808844  | 0.113743  | 1.089700  | x |

|      |    |           |           |           |   |
|------|----|-----------|-----------|-----------|---|
| x N  | 56 | 0.641681  | 0.207838  | 1.063541  | x |
| x N  | 57 | 0.741930  | 0.207025  | 1.027602  | x |
| x N  | 58 | 1.555706  | 0.025972  | 0.916925  | x |
| x N  | 59 | 1.479110  | 0.107807  | 0.914646  | x |
| x N  | 60 | 1.406168  | 0.198083  | 0.911962  | x |
| x O  | 1  | 0.215761  | 0.431108  | 0.547868  | x |
| x O  | 2  | -0.431108 | -0.215761 | -0.047868 | x |
| x O  | 3  | -0.215761 | -0.431108 | -0.547868 | x |
| x O  | 4  | 0.431108  | 0.215761  | 1.047868  | x |
| x F  | 1  | 0.330276  | 1.005975  | 0.442804  | x |
| x F  | 2  | 0.385753  | 0.971976  | 0.378685  | x |
| x F  | 3  | 0.473744  | 0.956417  | 0.440087  | x |
| x F  | 4  | -1.005975 | -0.330276 | 0.057196  | x |
| x F  | 5  | -0.971976 | -0.385753 | 0.121315  | x |
| x F  | 6  | -0.956417 | -0.473744 | 0.059913  | x |
| x F  | 7  | -0.330276 | -1.005975 | -0.442804 | x |
| x F  | 8  | -0.385753 | -0.971976 | -0.378685 | x |
| x F  | 9  | -0.473744 | -0.956417 | -0.440087 | x |
| x F  | 10 | 1.005975  | 0.330276  | 0.942804  | x |
| x F  | 11 | 0.971976  | 0.385753  | 0.878685  | x |
| x F  | 12 | 0.956417  | 0.473744  | 0.940087  | x |
| x Zn | 1  | 0.286866  | 1.547159  | 0.906110  | x |
| x Zn | 2  | 0.023848  | 1.220703  | 0.557787  | x |
| x Zn | 3  | -0.036204 | 0.688397  | 0.729552  | x |
| x Zn | 4  | -1.547159 | -0.286866 | -0.406110 | x |
| x Zn | 5  | -1.220703 | -0.023848 | -0.057787 | x |
| x Zn | 6  | -0.688397 | 0.036204  | -0.229552 | x |
| x Zn | 7  | -0.286866 | -1.547159 | -0.906110 | x |
| x Zn | 8  | -0.023848 | -1.220703 | -0.557787 | x |
| x Zn | 9  | 0.036204  | -0.688397 | -0.729552 | x |
| x Zn | 10 | 1.547159  | 0.286866  | 1.406110  | x |
| x Zn | 11 | 1.220703  | 0.023848  | 1.057787  | x |
| x Zn | 12 | 0.688397  | -0.036204 | 1.229552  | x |
| x I  | 1  | 0.325507  | 1.625665  | 0.870470  | x |
| x I  | 2  | 0.137953  | 1.626974  | 0.946954  | x |
| x I  | 3  | -0.135342 | 1.341455  | 0.598533  | x |
| x I  | 4  | 0.048536  | 1.237250  | 0.482855  | x |
| x I  | 5  | 0.019627  | 0.719875  | 0.807025  | x |
| x I  | 6  | -0.007684 | 0.536054  | 0.703822  | x |
| x I  | 7  | -1.625665 | -0.325507 | -0.370470 | x |
| x I  | 8  | -1.626974 | -0.137953 | -0.446954 | x |
| x I  | 9  | -1.341455 | 0.135342  | -0.098533 | x |
| x I  | 10 | -1.237250 | -0.048536 | 0.017145  | x |
| x I  | 11 | -0.719875 | -0.019627 | -0.307025 | x |
| x I  | 12 | -0.536054 | 0.007684  | -0.203822 | x |
| x I  | 13 | -0.325507 | -1.625665 | -0.870470 | x |



|     |    |           |           |           |   |
|-----|----|-----------|-----------|-----------|---|
| x I | 14 | -0.137953 | -1.626974 | -0.946954 | x |
| x I | 15 | 0.135342  | -1.341455 | -0.598533 | x |
| x I | 16 | -0.048536 | -1.237250 | -0.482855 | x |
| x I | 17 | -0.019627 | -0.719875 | -0.807025 | x |
| x I | 18 | 0.007684  | -0.536054 | -0.703822 | x |
| x I | 19 | 1.625665  | 0.325507  | 1.370470  | x |
| x I | 20 | 1.626974  | 0.137953  | 1.446954  | x |
| x I | 21 | 1.341455  | -0.135342 | 1.098533  | x |
| x I | 22 | 1.237250  | 0.048536  | 0.982855  | x |
| x I | 23 | 0.719875  | 0.019627  | 1.307025  | x |
| x I | 24 | 0.536054  | -0.007684 | 1.203822  | x |

**Table S7.** Fractional atomic coordinates of the optimised structure of vanillin@1a

| x | Element | Atom   | Fractional coordinates of atoms |           |          | x |
|---|---------|--------|---------------------------------|-----------|----------|---|
| x |         | Number | u                               | v         | w        | x |
| x | -----   |        |                                 |           |          | x |
| x | H       | 1      | 1.031368                        | 0.179077  | 0.132639 | x |
| x | H       | 2      | 0.986899                        | 0.268294  | 0.188782 | x |
| x | H       | 3      | 1.287810                        | 0.420110  | 0.215083 | x |
| x | H       | 4      | 1.319425                        | 0.326303  | 0.154238 | x |
| x | H       | 5      | 0.724835                        | 0.482590  | 0.327502 | x |
| x | H       | 6      | 0.902398                        | 0.508518  | 0.333579 | x |
| x | H       | 7      | 0.847011                        | 0.325353  | 0.219336 | x |
| x | H       | 8      | 0.671842                        | 0.306606  | 0.217866 | x |
| x | H       | 9      | 1.470461                        | 0.667655  | 0.353539 | x |
| x | H       | 10     | 1.348702                        | 0.560045  | 0.297744 | x |
| x | H       | 11     | 1.125748                        | 0.603239  | 0.368041 | x |
| x | H       | 12     | 1.254582                        | 0.705812  | 0.422105 | x |
| x | H       | 13     | 0.427431                        | 0.378580  | 0.340872 | x |
| x | H       | 14     | 0.353302                        | 0.299212  | 0.391972 | x |
| x | H       | 15     | 0.495290                        | 0.142365  | 0.340688 | x |
| x | H       | 16     | 0.556622                        | 0.223630  | 0.288684 | x |
| x | H       | 17     | 0.034072                        | 0.090853  | 0.538042 | x |
| x | H       | 18     | 0.145712                        | 0.048667  | 0.490232 | x |
| x | H       | 19     | 0.264886                        | 0.284218  | 0.475495 | x |
| x | H       | 20     | 0.154125                        | 0.318575  | 0.526195 | x |
| x | H       | 21     | 0.496611                        | -0.120921 | 0.379914 | x |
| x | H       | 22     | 0.459071                        | -0.003221 | 0.375242 | x |
| x | H       | 23     | 0.346107                        | -0.005736 | 0.495122 | x |
| x | H       | 24     | 0.390367                        | -0.122183 | 0.495952 | x |
| x | H       | 25     | -0.012208                       | 0.311060  | 0.667739 | x |
| x | H       | 26     | 0.094485                        | 0.365593  | 0.737204 | x |
| x | H       | 27     | 0.315188                        | 0.304833  | 0.672558 | x |
| x | H       | 28     | 0.203417                        | 0.258071  | 0.605499 | x |
| x | H       | 29     | 0.438994                        | 0.690276  | 0.923627 | x |
| x | H       | 30     | 0.470030                        | 0.582596  | 0.874490 | x |
| x | H       | 31     | 0.182969                        | 0.510474  | 0.810960 | x |
| x | H       | 32     | 0.163929                        | 0.623721  | 0.861286 | x |
| x | H       | 33     | 0.613186                        | 0.251732  | 0.734519 | x |
| x | H       | 34     | 0.458542                        | 0.276935  | 0.734430 | x |
| x | H       | 35     | 0.604050                        | 0.486527  | 0.832597 | x |
| x | H       | 36     | 0.754204                        | 0.454081  | 0.828305 | x |
| x | H       | 37     | 0.391591                        | 0.826756  | 0.875603 | x |
| x | H       | 38     | 0.545762                        | 0.939276  | 0.874683 | x |
| x | H       | 39     | 0.610393                        | 0.964184  | 1.007876 | x |
| x | H       | 40     | 0.450921                        | 0.852824  | 1.003897 | x |
| x | H       | 41     | 0.921571                        | 1.340073  | 0.860532 | x |

|     |    |           |           |           |   |
|-----|----|-----------|-----------|-----------|---|
| x H | 42 | 0.910516  | 1.265644  | 0.916862  | x |
| x H | 43 | 0.655817  | 1.086015  | 0.841276  | x |
| x H | 44 | 0.680775  | 1.163017  | 0.786892  | x |
| x H | 45 | 1.000360  | 1.032818  | 1.072864  | x |
| x H | 46 | 0.854103  | 1.004026  | 1.021582  | x |
| x H | 47 | 1.011420  | 1.214147  | 0.984144  | x |
| x H | 48 | 1.154196  | 1.231784  | 1.034095  | x |
| x H | 49 | 0.403701  | 0.087373  | 0.205607  | x |
| x H | 50 | 0.307485  | 0.147661  | 0.234618  | x |
| x H | 51 | 0.219448  | -0.014956 | 0.339092  | x |
| x H | 52 | 0.328234  | -0.038993 | 0.285438  | x |
| x H | 53 | 0.191496  | 0.195378  | 0.230351  | x |
| x H | 54 | 0.292499  | 0.265918  | 0.266394  | x |
| x H | 55 | 0.175238  | 0.271389  | 0.269955  | x |
| x H | 56 | 0.139180  | 0.143143  | 0.353067  | x |
| x H | 57 | 0.423388  | 0.423938  | 0.600383  | x |
| x H | 58 | 0.256801  | 0.493523  | 0.545311  | x |
| x H | 59 | 0.461145  | 0.381991  | 0.454254  | x |
| x H | 60 | 0.470351  | 0.388250  | 0.531907  | x |
| x H | 61 | 0.138572  | 0.541716  | 0.460211  | x |
| x H | 62 | 0.126254  | 0.483099  | 0.498262  | x |
| x H | 63 | 0.222278  | 0.577767  | 0.507575  | x |
| x H | 64 | 0.303647  | 0.456251  | 0.408360  | x |
| x H | 65 | 1.013272  | 0.093483  | 0.208769  | x |
| x H | 66 | 0.768140  | 0.101199  | 0.186068  | x |
| x H | 67 | 0.928688  | 0.221638  | 0.334625  | x |
| x H | 68 | 1.010349  | 0.160561  | 0.279336  | x |
| x H | 69 | 0.559225  | 0.156486  | 0.200428  | x |
| x H | 70 | 0.671087  | 0.161661  | 0.179728  | x |
| x H | 71 | 0.593403  | 0.072613  | 0.191750  | x |
| x H | 72 | 0.694917  | 0.220477  | 0.308301  | x |
| x H | 73 | 0.067304  | 0.287252  | 0.426821  | x |
| x H | 74 | 0.007654  | 0.070111  | 0.375803  | x |
| x H | 75 | -0.202854 | 0.142406  | 0.479873  | x |
| x H | 76 | -0.059349 | 0.246193  | 0.464099  | x |
| x H | 77 | -0.128151 | -0.136259 | 0.345639  | x |
| x H | 78 | -0.015910 | -0.060473 | 0.371246  | x |
| x H | 79 | -0.089334 | -0.043046 | 0.332703  | x |
| x H | 80 | -0.267827 | -0.058225 | 0.429431  | x |
| x H | 81 | -1.031368 | -0.179077 | -0.132639 | x |
| x H | 82 | -0.986899 | -0.268294 | -0.188782 | x |
| x H | 83 | -1.287810 | -0.420110 | -0.215083 | x |
| x H | 84 | -1.319425 | -0.326303 | -0.154238 | x |
| x H | 85 | -0.724835 | -0.482590 | -0.327502 | x |
| x H | 86 | -0.902398 | -0.508518 | -0.333579 | x |
| x H | 87 | -0.847011 | -0.325353 | -0.219336 | x |

|     |     |           |           |           |   |
|-----|-----|-----------|-----------|-----------|---|
| x H | 88  | -0.671842 | -0.306606 | -0.217866 | x |
| x H | 89  | -1.470461 | -0.667655 | -0.353539 | x |
| x H | 90  | -1.348702 | -0.560045 | -0.297744 | x |
| x H | 91  | -1.125748 | -0.603239 | -0.368041 | x |
| x H | 92  | -1.254582 | -0.705812 | -0.422105 | x |
| x H | 93  | -0.427431 | -0.378580 | -0.340872 | x |
| x H | 94  | -0.353302 | -0.299212 | -0.391972 | x |
| x H | 95  | -0.495290 | -0.142365 | -0.340688 | x |
| x H | 96  | -0.556622 | -0.223630 | -0.288684 | x |
| x H | 97  | -0.034072 | -0.090853 | -0.538042 | x |
| x H | 98  | -0.145712 | -0.048667 | -0.490232 | x |
| x H | 99  | -0.264886 | -0.284218 | -0.475495 | x |
| x H | 100 | -0.154125 | -0.318575 | -0.526195 | x |
| x H | 101 | -0.496611 | 0.120921  | -0.379914 | x |
| x H | 102 | -0.459071 | 0.003221  | -0.375242 | x |
| x H | 103 | -0.346107 | 0.005736  | -0.495122 | x |
| x H | 104 | -0.390367 | 0.122183  | -0.495952 | x |
| x H | 105 | 0.012208  | -0.311060 | -0.667739 | x |
| x H | 106 | -0.094485 | -0.365593 | -0.737204 | x |
| x H | 107 | -0.315188 | -0.304833 | -0.672558 | x |
| x H | 108 | -0.203417 | -0.258071 | -0.605499 | x |
| x H | 109 | -0.438994 | -0.690276 | -0.923627 | x |
| x H | 110 | -0.470030 | -0.582596 | -0.874490 | x |
| x H | 111 | -0.182969 | -0.510474 | -0.810960 | x |
| x H | 112 | -0.163929 | -0.623721 | -0.861286 | x |
| x H | 113 | -0.613186 | -0.251732 | -0.734519 | x |
| x H | 114 | -0.458542 | -0.276935 | -0.734430 | x |
| x H | 115 | -0.604050 | -0.486527 | -0.832597 | x |
| x H | 116 | -0.754204 | -0.454081 | -0.828305 | x |
| x H | 117 | -0.391591 | -0.826756 | -0.875603 | x |
| x H | 118 | -0.545762 | -0.939276 | -0.874683 | x |
| x H | 119 | -0.610393 | -0.964184 | -1.007876 | x |
| x H | 120 | -0.450921 | -0.852824 | -1.003897 | x |
| x H | 121 | -0.921571 | -1.340073 | -0.860532 | x |
| x H | 122 | -0.910516 | -1.265644 | -0.916862 | x |
| x H | 123 | -0.655817 | -1.086015 | -0.841276 | x |
| x H | 124 | -0.680775 | -1.163017 | -0.786892 | x |
| x H | 125 | -1.000360 | -1.032818 | -1.072864 | x |
| x H | 126 | -0.854103 | -1.004026 | -1.021582 | x |
| x H | 127 | -1.011420 | -1.214147 | -0.984144 | x |
| x H | 128 | -1.154196 | -1.231784 | -1.034095 | x |
| x H | 129 | -0.403701 | -0.087373 | -0.205607 | x |
| x H | 130 | -0.307485 | -0.147661 | -0.234618 | x |
| x H | 131 | -0.219448 | 0.014956  | -0.339092 | x |
| x H | 132 | -0.328234 | 0.038993  | -0.285438 | x |
| x H | 133 | -0.191496 | -0.195378 | -0.230351 | x |

|     |     |           |           |           |   |
|-----|-----|-----------|-----------|-----------|---|
| x H | 134 | -0.292499 | -0.265918 | -0.266394 | x |
| x H | 135 | -0.175238 | -0.271389 | -0.269955 | x |
| x H | 136 | -0.139180 | -0.143143 | -0.353067 | x |
| x H | 137 | -0.423388 | -0.423938 | -0.600383 | x |
| x H | 138 | -0.256801 | -0.493523 | -0.545311 | x |
| x H | 139 | -0.461145 | -0.381991 | -0.454254 | x |
| x H | 140 | -0.470351 | -0.388250 | -0.531907 | x |
| x H | 141 | -0.138572 | -0.541716 | -0.460211 | x |
| x H | 142 | -0.126254 | -0.483099 | -0.498262 | x |
| x H | 143 | -0.222278 | -0.577767 | -0.507575 | x |
| x H | 144 | -0.303647 | -0.456251 | -0.408360 | x |
| x H | 145 | -1.013272 | -0.093483 | -0.208769 | x |
| x H | 146 | -0.768140 | -0.101199 | -0.186068 | x |
| x H | 147 | -0.928688 | -0.221638 | -0.334625 | x |
| x H | 148 | -1.010349 | -0.160561 | -0.279336 | x |
| x H | 149 | -0.559225 | -0.156486 | -0.200428 | x |
| x H | 150 | -0.671087 | -0.161661 | -0.179728 | x |
| x H | 151 | -0.593403 | -0.072613 | -0.191750 | x |
| x H | 152 | -0.694917 | -0.220477 | -0.308301 | x |
| x H | 153 | -0.067304 | -0.287252 | -0.426821 | x |
| x H | 154 | -0.007654 | -0.070111 | -0.375803 | x |
| x H | 155 | 0.202854  | -0.142406 | -0.479873 | x |
| x H | 156 | 0.059349  | -0.246193 | -0.464099 | x |
| x H | 157 | 0.128151  | 0.136259  | -0.345639 | x |
| x H | 158 | 0.015910  | 0.060473  | -0.371246 | x |
| x H | 159 | 0.089334  | 0.043046  | -0.332703 | x |
| x H | 160 | 0.267827  | 0.058225  | -0.429431 | x |
| x C | 1   | 1.085948  | 0.233756  | 0.150837  | x |
| x C | 2   | 1.061666  | 0.283047  | 0.182688  | x |
| x C | 3   | 1.134228  | 0.351224  | 0.206460  | x |
| x C | 4   | 1.229205  | 0.368163  | 0.196739  | x |
| x C | 5   | 1.247413  | 0.316636  | 0.163632  | x |
| x C | 6   | 0.755337  | 0.449291  | 0.304302  | x |
| x C | 7   | 0.853559  | 0.463096  | 0.307503  | x |
| x C | 8   | 0.888687  | 0.418888  | 0.276617  | x |
| x C | 9   | 0.822735  | 0.361201  | 0.243853  | x |
| x C | 10  | 0.726030  | 0.350404  | 0.242843  | x |
| x C | 11  | 1.393184  | 0.651244  | 0.355395  | x |
| x C | 12  | 1.325455  | 0.592238  | 0.324418  | x |
| x C | 13  | 1.227319  | 0.573072  | 0.328808  | x |
| x C | 14  | 1.201307  | 0.615563  | 0.363930  | x |
| x C | 15  | 1.272756  | 0.673020  | 0.393897  | x |
| x C | 16  | 1.109367  | 0.403464  | 0.241145  | x |
| x C | 17  | 0.992951  | 0.433697  | 0.276067  | x |
| x C | 18  | 1.151490  | 0.508153  | 0.297793  | x |
| x C | 19  | 0.440236  | 0.325850  | 0.342045  | x |

|     |    |          |           |          |   |
|-----|----|----------|-----------|----------|---|
| x C | 20 | 0.400359 | 0.282205  | 0.370440 | x |
| x C | 21 | 0.421556 | 0.216142  | 0.370827 | x |
| x C | 22 | 0.480041 | 0.194784  | 0.341763 | x |
| x C | 23 | 0.515025 | 0.240098  | 0.313529 | x |
| x C | 24 | 0.087039 | 0.131311  | 0.523392 | x |
| x C | 25 | 0.147467 | 0.108247  | 0.496649 | x |
| x C | 26 | 0.213231 | 0.163981  | 0.479230 | x |
| x C | 27 | 0.214821 | 0.240171  | 0.488968 | x |
| x C | 28 | 0.153989 | 0.259476  | 0.516738 | x |
| x C | 29 | 0.463613 | -0.093292 | 0.404712 | x |
| x C | 30 | 0.443282 | -0.028244 | 0.402440 | x |
| x C | 31 | 0.399858 | 0.004234  | 0.434914 | x |
| x C | 32 | 0.381051 | -0.028783 | 0.469562 | x |
| x C | 33 | 0.404401 | -0.093397 | 0.469970 | x |
| x C | 34 | 0.381513 | 0.169449  | 0.401266 | x |
| x C | 35 | 0.283532 | 0.145097  | 0.452451 | x |
| x C | 36 | 0.370640 | 0.069639  | 0.431256 | x |
| x C | 37 | 0.061309 | 0.312024  | 0.670195 | x |
| x C | 38 | 0.120063 | 0.340801  | 0.708691 | x |
| x C | 39 | 0.213057 | 0.338925  | 0.709847 | x |
| x C | 40 | 0.243246 | 0.306842  | 0.672572 | x |
| x C | 41 | 0.181369 | 0.281293  | 0.635397 | x |
| x C | 42 | 0.383855 | 0.649075  | 0.898286 | x |
| x C | 43 | 0.400747 | 0.588850  | 0.871055 | x |
| x C | 44 | 0.327740 | 0.537295  | 0.839298 | x |
| x C | 45 | 0.241142 | 0.549543  | 0.835562 | x |
| x C | 46 | 0.229829 | 0.611575  | 0.863414 | x |
| x C | 47 | 0.606847 | 0.302316  | 0.756150 | x |
| x C | 48 | 0.522134 | 0.316554  | 0.756117 | x |
| x C | 49 | 0.519377 | 0.383393  | 0.783877 | x |
| x C | 50 | 0.603625 | 0.433918  | 0.810546 | x |
| x C | 51 | 0.686327 | 0.416065  | 0.808758 | x |
| x C | 52 | 0.283210 | 0.375662  | 0.748360 | x |
| x C | 53 | 0.341071 | 0.472406  | 0.809014 | x |
| x C | 54 | 0.428990 | 0.399519  | 0.783299 | x |
| x C | 55 | 0.441553 | 0.860299  | 0.904157 | x |
| x C | 56 | 0.526162 | 0.922248  | 0.903926 | x |
| x C | 57 | 0.588008 | 0.961412  | 0.941855 | x |
| x C | 58 | 0.562505 | 0.935984  | 0.978280 | x |
| x C | 59 | 0.475754 | 0.874555  | 0.976313 | x |
| x C | 60 | 0.864874 | 1.283087  | 0.857718 | x |
| x C | 61 | 0.858003 | 1.242153  | 0.888693 | x |
| x C | 62 | 0.781919 | 1.170562  | 0.883472 | x |
| x C | 63 | 0.715871 | 1.141648  | 0.846757 | x |
| x C | 64 | 0.728579 | 1.184806  | 0.816607 | x |
| x C | 65 | 1.000080 | 1.070144  | 1.051691 | x |

|     |     |           |           |           |   |
|-----|-----|-----------|-----------|-----------|---|
| x C | 66  | 0.919652  | 1.054906  | 1.023762  | x |
| x C | 67  | 0.922462  | 1.107083  | 0.999016  | x |
| x C | 68  | 1.007399  | 1.172323  | 1.002844  | x |
| x C | 69  | 1.085693  | 1.182896  | 1.030621  | x |
| x C | 70  | 0.680226  | 1.026314  | 0.943006  | x |
| x C | 71  | 0.771819  | 1.124588  | 0.915453  | x |
| x C | 72  | 0.837413  | 1.094923  | 0.970016  | x |
| x C | 73  | 0.392783  | 0.046673  | 0.226727  | x |
| x C | 74  | 0.325600  | 0.054145  | 0.257250  | x |
| x C | 75  | 0.288276  | 0.113212  | 0.258047  | x |
| x C | 76  | 0.229500  | 0.127348  | 0.288380  | x |
| x C | 77  | 0.205009  | 0.080600  | 0.317873  | x |
| x C | 78  | 0.240251  | 0.020437  | 0.316131  | x |
| x C | 79  | 0.300038  | 0.007109  | 0.286211  | x |
| x C | 80  | 0.214531  | 0.231916  | 0.262958  | x |
| x C | 81  | 0.371603  | 0.447499  | 0.588577  | x |
| x C | 82  | 0.365536  | 0.442915  | 0.543104  | x |
| x C | 83  | 0.301418  | 0.470397  | 0.524754  | x |
| x C | 84  | 0.296804  | 0.467068  | 0.481976  | x |
| x C | 85  | 0.355746  | 0.435528  | 0.456540  | x |
| x C | 86  | 0.417372  | 0.406732  | 0.474470  | x |
| x C | 87  | 0.422428  | 0.410757  | 0.517607  | x |
| x C | 88  | 0.177265  | 0.525252  | 0.483278  | x |
| x C | 89  | 0.942487  | 0.094183  | 0.197163  | x |
| x C | 90  | 0.893625  | 0.128038  | 0.229572  | x |
| x C | 91  | 0.801334  | 0.127677  | 0.218697  | x |
| x C | 92  | 0.756459  | 0.160975  | 0.249472  | x |
| x C | 93  | 0.803063  | 0.194895  | 0.291444  | x |
| x C | 94  | 0.894274  | 0.195098  | 0.302128  | x |
| x C | 95  | 0.939063  | 0.161044  | 0.271187  | x |
| x C | 96  | 0.619891  | 0.136797  | 0.200998  | x |
| x C | 97  | 0.059863  | 0.228183  | 0.408037  | x |
| x C | 98  | -0.018800 | 0.164877  | 0.417844  | x |
| x C | 99  | -0.038915 | 0.085652  | 0.398147  | x |
| x C | 100 | -0.117252 | 0.028446  | 0.407936  | x |
| x C | 101 | -0.178084 | 0.049635  | 0.436939  | x |
| x C | 102 | -0.156380 | 0.127828  | 0.457094  | x |
| x C | 103 | -0.076836 | 0.185012  | 0.447931  | x |
| x C | 104 | -0.090443 | -0.073229 | 0.358096  | x |
| x C | 105 | -1.085948 | -0.233756 | -0.150837 | x |
| x C | 106 | -1.061666 | -0.283047 | -0.182688 | x |
| x C | 107 | -1.134228 | -0.351224 | -0.206460 | x |
| x C | 108 | -1.229205 | -0.368163 | -0.196739 | x |
| x C | 109 | -1.247413 | -0.316636 | -0.163632 | x |
| x C | 110 | -0.755337 | -0.449291 | -0.304302 | x |
| x C | 111 | -0.853559 | -0.463096 | -0.307503 | x |

|     |     |           |           |           |   |
|-----|-----|-----------|-----------|-----------|---|
| x C | 112 | -0.888687 | -0.418888 | -0.276617 | x |
| x C | 113 | -0.822735 | -0.361201 | -0.243853 | x |
| x C | 114 | -0.726030 | -0.350404 | -0.242843 | x |
| x C | 115 | -1.393184 | -0.651244 | -0.355395 | x |
| x C | 116 | -1.325455 | -0.592238 | -0.324418 | x |
| x C | 117 | -1.227319 | -0.573072 | -0.328808 | x |
| x C | 118 | -1.201307 | -0.615563 | -0.363930 | x |
| x C | 119 | -1.272756 | -0.673020 | -0.393897 | x |
| x C | 120 | -1.109367 | -0.403464 | -0.241145 | x |
| x C | 121 | -0.992951 | -0.433697 | -0.276067 | x |
| x C | 122 | -1.151490 | -0.508153 | -0.297793 | x |
| x C | 123 | -0.440236 | -0.325850 | -0.342045 | x |
| x C | 124 | -0.400359 | -0.282205 | -0.370440 | x |
| x C | 125 | -0.421556 | -0.216142 | -0.370827 | x |
| x C | 126 | -0.480041 | -0.194784 | -0.341763 | x |
| x C | 127 | -0.515025 | -0.240098 | -0.313529 | x |
| x C | 128 | -0.087039 | -0.131311 | -0.523392 | x |
| x C | 129 | -0.147467 | -0.108247 | -0.496649 | x |
| x C | 130 | -0.213231 | -0.163981 | -0.479230 | x |
| x C | 131 | -0.214821 | -0.240171 | -0.488968 | x |
| x C | 132 | -0.153989 | -0.259476 | -0.516738 | x |
| x C | 133 | -0.463613 | 0.093292  | -0.404712 | x |
| x C | 134 | -0.443282 | 0.028244  | -0.402440 | x |
| x C | 135 | -0.399858 | -0.004234 | -0.434914 | x |
| x C | 136 | -0.381051 | 0.028783  | -0.469562 | x |
| x C | 137 | -0.404401 | 0.093397  | -0.469970 | x |
| x C | 138 | -0.381513 | -0.169449 | -0.401266 | x |
| x C | 139 | -0.283532 | -0.145097 | -0.452451 | x |
| x C | 140 | -0.370640 | -0.069639 | -0.431256 | x |
| x C | 141 | -0.061309 | -0.312024 | -0.670195 | x |
| x C | 142 | -0.120063 | -0.340801 | -0.708691 | x |
| x C | 143 | -0.213057 | -0.338925 | -0.709847 | x |
| x C | 144 | -0.243246 | -0.306842 | -0.672572 | x |
| x C | 145 | -0.181369 | -0.281293 | -0.635397 | x |
| x C | 146 | -0.383855 | -0.649075 | -0.898286 | x |
| x C | 147 | -0.400747 | -0.588850 | -0.871055 | x |
| x C | 148 | -0.327740 | -0.537295 | -0.839298 | x |
| x C | 149 | -0.241142 | -0.549543 | -0.835562 | x |
| x C | 150 | -0.229829 | -0.611575 | -0.863414 | x |
| x C | 151 | -0.606847 | -0.302316 | -0.756150 | x |
| x C | 152 | -0.522134 | -0.316554 | -0.756117 | x |
| x C | 153 | -0.519377 | -0.383393 | -0.783877 | x |
| x C | 154 | -0.603625 | -0.433918 | -0.810546 | x |
| x C | 155 | -0.686327 | -0.416065 | -0.808758 | x |
| x C | 156 | -0.283210 | -0.375662 | -0.748360 | x |
| x C | 157 | -0.341071 | -0.472406 | -0.809014 | x |



|     |     |           |           |           |   |
|-----|-----|-----------|-----------|-----------|---|
| x C | 158 | -0.428990 | -0.399519 | -0.783299 | x |
| x C | 159 | -0.441553 | -0.860299 | -0.904157 | x |
| x C | 160 | -0.526162 | -0.922248 | -0.903926 | x |
| x C | 161 | -0.588008 | -0.961412 | -0.941855 | x |
| x C | 162 | -0.562505 | -0.935984 | -0.978280 | x |
| x C | 163 | -0.475754 | -0.874555 | -0.976313 | x |
| x C | 164 | -0.864874 | -1.283087 | -0.857718 | x |
| x C | 165 | -0.858003 | -1.242153 | -0.888693 | x |
| x C | 166 | -0.781919 | -1.170562 | -0.883472 | x |
| x C | 167 | -0.715871 | -1.141648 | -0.846757 | x |
| x C | 168 | -0.728579 | -1.184806 | -0.816607 | x |
| x C | 169 | -1.000080 | -1.070144 | -1.051691 | x |
| x C | 170 | -0.919652 | -1.054906 | -1.023762 | x |
| x C | 171 | -0.922462 | -1.107083 | -0.999016 | x |
| x C | 172 | -1.007399 | -1.172323 | -1.002844 | x |
| x C | 173 | -1.085693 | -1.182896 | -1.030621 | x |
| x C | 174 | -0.680226 | -1.026314 | -0.943006 | x |
| x C | 175 | -0.771819 | -1.124588 | -0.915453 | x |
| x C | 176 | -0.837413 | -1.094923 | -0.970016 | x |
| x C | 177 | -0.392783 | -0.046673 | -0.226727 | x |
| x C | 178 | -0.325600 | -0.054145 | -0.257250 | x |
| x C | 179 | -0.288276 | -0.113212 | -0.258047 | x |
| x C | 180 | -0.229500 | -0.127348 | -0.288380 | x |
| x C | 181 | -0.205009 | -0.080600 | -0.317873 | x |
| x C | 182 | -0.240251 | -0.020437 | -0.316131 | x |
| x C | 183 | -0.300038 | -0.007109 | -0.286211 | x |
| x C | 184 | -0.214531 | -0.231916 | -0.262958 | x |
| x C | 185 | -0.371603 | -0.447499 | -0.588577 | x |
| x C | 186 | -0.365536 | -0.442915 | -0.543104 | x |
| x C | 187 | -0.301418 | -0.470397 | -0.524754 | x |
| x C | 188 | -0.296804 | -0.467068 | -0.481976 | x |
| x C | 189 | -0.355746 | -0.435528 | -0.456540 | x |
| x C | 190 | -0.417372 | -0.406732 | -0.474470 | x |
| x C | 191 | -0.422428 | -0.410757 | -0.517607 | x |
| x C | 192 | -0.177265 | -0.525252 | -0.483278 | x |
| x C | 193 | -0.942487 | -0.094183 | -0.197163 | x |
| x C | 194 | -0.893625 | -0.128038 | -0.229572 | x |
| x C | 195 | -0.801334 | -0.127677 | -0.218697 | x |
| x C | 196 | -0.756459 | -0.160975 | -0.249472 | x |
| x C | 197 | -0.803063 | -0.194895 | -0.291444 | x |
| x C | 198 | -0.894274 | -0.195098 | -0.302128 | x |
| x C | 199 | -0.939063 | -0.161044 | -0.271187 | x |
| x C | 200 | -0.619891 | -0.136797 | -0.200998 | x |
| x C | 201 | -0.059863 | -0.228183 | -0.408037 | x |
| x C | 202 | 0.018800  | -0.164877 | -0.417844 | x |
| x C | 203 | 0.038915  | -0.085652 | -0.398147 | x |

|     |     |           |           |           |   |
|-----|-----|-----------|-----------|-----------|---|
| x C | 204 | 0.117252  | -0.028446 | -0.407936 | x |
| x C | 205 | 0.178084  | -0.049635 | -0.436939 | x |
| x C | 206 | 0.156380  | -0.127828 | -0.457094 | x |
| x C | 207 | 0.076836  | -0.185012 | -0.447931 | x |
| x C | 208 | 0.090443  | 0.073229  | -0.358096 | x |
| x N | 1   | 1.177166  | 0.250160  | 0.141293  | x |
| x N | 2   | 0.691725  | 0.393356  | 0.272441  | x |
| x N | 3   | 1.367749  | 0.691002  | 0.389868  | x |
| x N | 4   | 1.015251  | 0.384188  | 0.245631  | x |
| x N | 5   | 1.058519  | 0.495076  | 0.304107  | x |
| x N | 6   | 1.180727  | 0.466164  | 0.265818  | x |
| x N | 7   | 0.496521  | 0.305180  | 0.313774  | x |
| x N | 8   | 0.090699  | 0.205805  | 0.533791  | x |
| x N | 9   | 0.444048  | -0.125986 | 0.438050  | x |
| x N | 10  | 0.320073  | 0.190429  | 0.425932  | x |
| x N | 11  | 0.307380  | 0.084865  | 0.457005  | x |
| x N | 12  | 0.407816  | 0.108653  | 0.402117  | x |
| x N | 13  | 0.091926  | 0.283274  | 0.633900  | x |
| x N | 14  | 0.300267  | 0.660709  | 0.894589  | x |
| x N | 15  | 0.688051  | 0.350803  | 0.782043  | x |
| x N | 16  | 0.269825  | 0.433024  | 0.776738  | x |
| x N | 17  | 0.422914  | 0.458367  | 0.813699  | x |
| x N | 18  | 0.360028  | 0.354740  | 0.750828  | x |
| x N | 19  | 0.415643  | 0.837557  | 0.939969  | x |
| x N | 20  | 0.801012  | 1.255188  | 0.822194  | x |
| x N | 21  | 1.082223  | 1.132897  | 1.055029  | x |
| x N | 22  | 0.685747  | 1.067144  | 0.913679  | x |
| x N | 23  | 0.850112  | 1.140324  | 0.942529  | x |
| x N | 24  | 0.753000  | 1.038662  | 0.972491  | x |
| x N | 25  | -1.177166 | -0.250160 | -0.141293 | x |
| x N | 26  | -0.691725 | -0.393356 | -0.272441 | x |
| x N | 27  | -1.367749 | -0.691002 | -0.389868 | x |
| x N | 28  | -1.015251 | -0.384188 | -0.245631 | x |
| x N | 29  | -1.058519 | -0.495076 | -0.304107 | x |
| x N | 30  | -1.180727 | -0.466164 | -0.265818 | x |
| x N | 31  | -0.496521 | -0.305180 | -0.313774 | x |
| x N | 32  | -0.090699 | -0.205805 | -0.533791 | x |
| x N | 33  | -0.444048 | 0.125986  | -0.438050 | x |
| x N | 34  | -0.320073 | -0.190429 | -0.425932 | x |
| x N | 35  | -0.307380 | -0.084865 | -0.457005 | x |
| x N | 36  | -0.407816 | -0.108653 | -0.402117 | x |
| x N | 37  | -0.091926 | -0.283274 | -0.633900 | x |
| x N | 38  | -0.300267 | -0.660709 | -0.894589 | x |
| x N | 39  | -0.688051 | -0.350803 | -0.782043 | x |
| x N | 40  | -0.269825 | -0.433024 | -0.776738 | x |
| x N | 41  | -0.422914 | -0.458367 | -0.813699 | x |

|      |    |           |           |           |   |
|------|----|-----------|-----------|-----------|---|
| x N  | 42 | -0.360028 | -0.354740 | -0.750828 | x |
| x N  | 43 | -0.415643 | -0.837557 | -0.939969 | x |
| x N  | 44 | -0.801012 | -1.255188 | -0.822194 | x |
| x N  | 45 | -1.082223 | -1.132897 | -1.055029 | x |
| x N  | 46 | -0.685747 | -1.067144 | -0.913679 | x |
| x N  | 47 | -0.850112 | -1.140324 | -0.942529 | x |
| x N  | 48 | -0.753000 | -1.038662 | -0.972491 | x |
| x O  | 1  | 0.436078  | 0.000739  | 0.222872  | x |
| x O  | 2  | 0.191165  | 0.184080  | 0.292562  | x |
| x O  | 3  | 0.147770  | 0.091491  | 0.347912  | x |
| x O  | 4  | 0.324350  | 0.474677  | 0.613591  | x |
| x O  | 5  | 0.237722  | 0.490356  | 0.459649  | x |
| x O  | 6  | 0.350783  | 0.433295  | 0.414464  | x |
| x O  | 7  | 0.911595  | 0.068634  | 0.159082  | x |
| x O  | 8  | 0.667387  | 0.165621  | 0.243556  | x |
| x O  | 9  | 0.759020  | 0.228412  | 0.321497  | x |
| x O  | 10 | 0.116224  | 0.223416  | 0.381013  | x |
| x O  | 11 | -0.144521 | -0.049951 | 0.390749  | x |
| x O  | 12 | -0.258459 | -0.004404 | 0.445338  | x |
| x O  | 13 | -0.436078 | -0.000739 | -0.222872 | x |
| x O  | 14 | -0.191165 | -0.184080 | -0.292562 | x |
| x O  | 15 | -0.147770 | -0.091491 | -0.347912 | x |
| x O  | 16 | -0.324350 | -0.474677 | -0.613591 | x |
| x O  | 17 | -0.237722 | -0.490356 | -0.459649 | x |
| x O  | 18 | -0.350783 | -0.433295 | -0.414464 | x |
| x O  | 19 | -0.911595 | -0.068634 | -0.159082 | x |
| x O  | 20 | -0.667387 | -0.165621 | -0.243556 | x |
| x O  | 21 | -0.759020 | -0.228412 | -0.321497 | x |
| x O  | 22 | -0.116224 | -0.223416 | -0.381013 | x |
| x O  | 23 | 0.144521  | 0.049951  | -0.390749 | x |
| x O  | 24 | 0.258459  | 0.004404  | -0.445338 | x |
| x Zn | 1  | 1.203333  | 0.162752  | 0.098279  | x |
| x Zn | 2  | 1.470923  | 0.774725  | 0.437849  | x |
| x Zn | 3  | 0.543345  | 0.367514  | 0.267916  | x |
| x Zn | 4  | 0.003631  | 0.240733  | 0.575664  | x |
| x Zn | 5  | 0.810923  | 0.320973  | 0.778156  | x |
| x Zn | 6  | 0.281215  | 0.750912  | 0.938118  | x |
| x Zn | 7  | -1.203333 | -0.162752 | -0.098279 | x |
| x Zn | 8  | -1.470923 | -0.774725 | -0.437849 | x |
| x Zn | 9  | -0.543345 | -0.367514 | -0.267916 | x |
| x Zn | 10 | -0.003631 | -0.240733 | -0.575664 | x |
| x Zn | 11 | -0.810923 | -0.320973 | -0.778156 | x |
| x Zn | 12 | -0.281215 | -0.750912 | -0.938118 | x |
| x I  | 1  | 1.181625  | 0.057093  | 0.137671  | x |
| x I  | 2  | 1.350981  | 0.229209  | 0.063901  | x |
| x I  | 3  | 1.427425  | 0.732125  | 0.506563  | x |

|     |    |           |           |           |   |
|-----|----|-----------|-----------|-----------|---|
| x I | 4  | 1.635306  | 0.793176  | 0.409401  | x |
| x I | 5  | 0.459716  | 0.268758  | 0.197344  | x |
| x I | 6  | 0.494305  | 0.485936  | 0.289472  | x |
| x I | 7  | -0.139513 | 0.120288  | 0.582371  | x |
| x I | 8  | -0.005542 | 0.369813  | 0.562291  | x |
| x I | 9  | 0.790469  | 0.231432  | 0.702713  | x |
| x I | 10 | 0.959903  | 0.447145  | 0.804181  | x |
| x I | 11 | 0.267455  | 0.718198  | 1.010466  | x |
| x I | 12 | 0.158233  | 0.785433  | 0.897353  | x |
| x I | 13 | -1.181625 | -0.057093 | -0.137671 | x |
| x I | 14 | -1.350981 | -0.229209 | -0.063901 | x |
| x I | 15 | -1.427425 | -0.732125 | -0.506563 | x |
| x I | 16 | -1.635306 | -0.793176 | -0.409401 | x |
| x I | 17 | -0.459716 | -0.268758 | -0.197344 | x |
| x I | 18 | -0.494305 | -0.485936 | -0.289472 | x |
| x I | 19 | 0.139513  | -0.120288 | -0.582371 | x |
| x I | 20 | 0.005542  | -0.369813 | -0.562291 | x |
| x I | 21 | -0.790469 | -0.231432 | -0.702713 | x |
| x I | 22 | -0.959903 | -0.447145 | -0.804181 | x |
| x I | 23 | -0.267455 | -0.718198 | -1.010466 | x |
| x I | 24 | -0.158233 | -0.785433 | -0.897353 | x |

**Table S8.** Fractional atomic coordinates of the optimised structure of (1*R*)-(-)-menthyl acetate@**1b**

| x | Element | Atom   | Fractional coordinates of atoms |          |           | x |
|---|---------|--------|---------------------------------|----------|-----------|---|
| x |         | Number | u                               | v        | w         | x |
| x | -----x  |        |                                 |          |           |   |
| x | H       | 1      | -0.214128                       | 1.130578 | 0.653845  | x |
| x | H       | 2      | -0.050082                       | 1.083930 | 0.651748  | x |
| x | H       | 3      | 0.083279                        | 0.882573 | 0.742368  | x |
| x | H       | 4      | -0.085877                       | 0.937887 | 0.741405  | x |
| x | H       | 5      | 0.397984                        | 1.000761 | 0.618949  | x |
| x | H       | 6      | 0.382862                        | 0.928940 | 0.667546  | x |
| x | H       | 7      | 0.102565                        | 1.036288 | 0.598506  | x |
| x | H       | 8      | 0.132618                        | 1.097060 | 0.550244  | x |
| x | H       | 9      | 0.478644                        | 0.596256 | 0.806198  | x |
| x | H       | 10     | 0.320511                        | 0.718938 | 0.760472  | x |
| x | H       | 11     | 0.460972                        | 0.816256 | 0.738114  | x |
| x | H       | 12     | 0.610169                        | 0.694612 | 0.785414  | x |
| x | H       | 13     | 0.188016                        | 1.296641 | 0.597547  | x |
| x | H       | 14     | 0.028444                        | 1.477307 | 0.597336  | x |
| x | H       | 15     | -0.071275                       | 1.395852 | 0.481493  | x |
| x | H       | 16     | 0.094545                        | 1.217432 | 0.485909  | x |
| x | H       | 17     | -0.398258                       | 2.052302 | 0.615289  | x |
| x | H       | 18     | 0.923423                        | 0.734936 | 0.108525  | x |
| x | H       | 19     | -0.378966                       | 1.921868 | 0.561737  | x |
| x | H       | 20     | -0.084840                       | 1.699736 | 0.623461  | x |
| x | H       | 21     | -0.115553                       | 1.838258 | 0.674206  | x |
| x | H       | 22     | -0.366606                       | 1.614935 | 0.363272  | x |
| x | H       | 23     | -0.246989                       | 1.558521 | 0.426462  | x |
| x | H       | 24     | -0.459583                       | 1.859094 | 0.485310  | x |
| x | H       | 25     | -0.571390                       | 1.904615 | 0.419562  | x |
| x | H       | 26     | -0.547228                       | 1.631811 | 0.297267  | x |
| x | H       | 27     | -0.429756                       | 1.472380 | 0.251288  | x |
| x | H       | 28     | -0.294935                       | 1.583765 | 0.239456  | x |
| x | H       | 29     | -0.410445                       | 1.733051 | 0.287624  | x |
| x | H       | 30     | -0.007231                       | 0.922829 | 0.147798  | x |
| x | H       | 31     | -0.055003                       | 1.087893 | 0.146906  | x |
| x | H       | 32     | -0.259412                       | 1.218549 | 0.235844  | x |
| x | H       | 33     | -0.200643                       | 1.047973 | 0.234874  | x |
| x | H       | 34     | -0.094753                       | 1.506556 | 0.120460  | x |
| x | H       | 35     | -0.162321                       | 1.493059 | 0.171655  | x |
| x | H       | 36     | -0.114899                       | 1.247087 | 0.091819  | x |
| x | H       | 37     | -0.053646                       | 1.273308 | 0.042270  | x |
| x | H       | 38     | 0.089489                        | 1.219811 | -0.019809 | x |
| x | H       | 39     | 0.268480                        | 1.053868 | -0.023300 | x |
| x | H       | 40     | 0.347609                        | 1.158881 | 0.091086  | x |

|     |    |           |          |           |   |
|-----|----|-----------|----------|-----------|---|
| x H | 41 | 0.166942  | 1.320314 | 0.089848  | x |
| x H | 42 | 0.777358  | 0.551062 | -0.080811 | x |
| x H | 43 | 0.730115  | 0.664786 | -0.015201 | x |
| x H | 44 | 0.427994  | 0.871005 | -0.073844 | x |
| x H | 45 | 0.485904  | 0.750186 | -0.136579 | x |
| x H | 46 | 0.708067  | 1.014942 | 0.169124  | x |
| x H | 47 | 0.570096  | 1.045067 | 0.118440  | x |
| x H | 48 | 0.792230  | 0.752035 | 0.056304  | x |
| x H | 49 | 0.631892  | 0.907255 | 0.761487  | x |
| x H | 50 | 0.751359  | 0.686692 | 0.768132  | x |
| x H | 51 | 0.891951  | 0.660093 | 0.749032  | x |
| x H | 52 | 0.808051  | 0.789110 | 0.742559  | x |
| x H | 53 | 0.828944  | 0.685727 | 0.675667  | x |
| x H | 54 | 0.789897  | 0.637396 | 0.694906  | x |
| x H | 55 | 0.663735  | 0.856463 | 0.682829  | x |
| x H | 56 | 0.605365  | 0.762299 | 0.714163  | x |
| x H | 57 | 0.525579  | 0.891649 | 0.707267  | x |
| x H | 58 | 0.371377  | 0.983824 | 0.799148  | x |
| x H | 59 | 0.395844  | 1.037739 | 0.845116  | x |
| x H | 60 | 0.468210  | 0.904905 | 0.836724  | x |
| x H | 61 | 0.910111  | 0.674395 | 0.861673  | x |
| x H | 62 | 0.943502  | 0.658902 | 0.813295  | x |
| x H | 63 | 0.899837  | 0.601704 | 0.819634  | x |
| x H | 64 | 0.733631  | 0.771710 | 0.834809  | x |
| x H | 65 | 0.817311  | 0.852684 | 0.812592  | x |
| x H | 66 | 0.792401  | 0.861512 | 0.861945  | x |
| x H | 67 | 0.691858  | 0.925983 | 0.822729  | x |
| x H | 68 | 0.687249  | 0.741783 | 0.618829  | x |
| x H | 69 | 0.560091  | 0.832236 | 0.630211  | x |
| x H | 70 | 0.639481  | 0.706436 | 0.641650  | x |
| x H | 71 | -0.208410 | 0.764428 | 0.256423  | x |
| x H | 72 | -0.412722 | 0.824730 | 0.243941  | x |
| x H | 73 | -0.462182 | 0.951909 | 0.202295  | x |
| x H | 74 | -0.342523 | 0.913609 | 0.217818  | x |
| x H | 75 | -0.497642 | 1.001168 | 0.275482  | x |
| x H | 76 | -0.467819 | 1.064763 | 0.262167  | x |
| x H | 77 | -0.294394 | 0.943703 | 0.293691  | x |
| x H | 78 | -0.357219 | 0.843724 | 0.315761  | x |
| x H | 79 | -0.237611 | 0.808175 | 0.329783  | x |
| x H | 80 | -0.155650 | 0.531624 | 0.312118  | x |
| x H | 81 | -0.026447 | 0.472239 | 0.315863  | x |
| x H | 82 | -0.091501 | 0.472194 | 0.267629  | x |
| x H | 83 | -0.473264 | 0.850946 | 0.156197  | x |
| x H | 84 | -0.468174 | 0.775483 | 0.183255  | x |
| x H | 85 | -0.406246 | 0.722536 | 0.138096  | x |
| x H | 86 | -0.283639 | 0.669597 | 0.199807  | x |

|     |     |           |           |           |   |
|-----|-----|-----------|-----------|-----------|---|
| x H | 87  | -0.311747 | 0.815948  | 0.155884  | x |
| x H | 88  | -0.246054 | 0.687087  | 0.139489  | x |
| x H | 89  | -0.198819 | 0.721502  | 0.184658  | x |
| x H | 90  | -0.422650 | 1.091211  | 0.338743  | x |
| x H | 91  | -0.328785 | 0.985376  | 0.367095  | x |
| x H | 92  | -0.447818 | 1.021466  | 0.350234  | x |
| x H | 93  | -0.443420 | 1.253643  | 0.257235  | x |
| x H | 94  | -0.486671 | 0.705752  | 0.049876  | x |
| x H | 95  | -1.130578 | 0.214128  | -0.653845 | x |
| x H | 96  | -1.083930 | 0.050082  | -0.651748 | x |
| x H | 97  | -0.882573 | -0.083279 | -0.742368 | x |
| x H | 98  | -0.937887 | 0.085877  | -0.741405 | x |
| x H | 99  | -1.000761 | -0.397984 | -0.618949 | x |
| x H | 100 | -0.928940 | -0.382862 | -0.667546 | x |
| x H | 101 | -1.036288 | -0.102565 | -0.598506 | x |
| x H | 102 | -1.097060 | -0.132618 | -0.550244 | x |
| x H | 103 | -0.596256 | -0.478644 | -0.806198 | x |
| x H | 104 | -0.718938 | -0.320511 | -0.760472 | x |
| x H | 105 | -0.816256 | -0.460972 | -0.738114 | x |
| x H | 106 | -0.694612 | -0.610169 | -0.785414 | x |
| x H | 107 | -1.296641 | -0.188016 | -0.597547 | x |
| x H | 108 | -1.477307 | -0.028444 | -0.597336 | x |
| x H | 109 | -1.395852 | 0.071275  | -0.481493 | x |
| x H | 110 | -1.217432 | -0.094545 | -0.485909 | x |
| x H | 111 | -2.052302 | 0.398258  | -0.615289 | x |
| x H | 112 | -0.734936 | -0.923423 | -0.108525 | x |
| x H | 113 | -1.921868 | 0.378966  | -0.561737 | x |
| x H | 114 | -1.699736 | 0.084840  | -0.623461 | x |
| x H | 115 | -1.838258 | 0.115553  | -0.674206 | x |
| x H | 116 | -1.614935 | 0.366606  | -0.363272 | x |
| x H | 117 | -1.558521 | 0.246989  | -0.426462 | x |
| x H | 118 | -1.859094 | 0.459583  | -0.485310 | x |
| x H | 119 | -1.904615 | 0.571390  | -0.419562 | x |
| x H | 120 | -1.631811 | 0.547228  | -0.297267 | x |
| x H | 121 | -1.472380 | 0.429756  | -0.251288 | x |
| x H | 122 | -1.583765 | 0.294935  | -0.239456 | x |
| x H | 123 | -1.733051 | 0.410445  | -0.287624 | x |
| x H | 124 | -0.922829 | 0.007231  | -0.147798 | x |
| x H | 125 | -1.087893 | 0.055003  | -0.146906 | x |
| x H | 126 | -1.218549 | 0.259412  | -0.235844 | x |
| x H | 127 | -1.047973 | 0.200643  | -0.234874 | x |
| x H | 128 | -1.506556 | 0.094753  | -0.120460 | x |
| x H | 129 | -1.493059 | 0.162321  | -0.171655 | x |
| x H | 130 | -1.247087 | 0.114899  | -0.091819 | x |
| x H | 131 | -1.273308 | 0.053646  | -0.042270 | x |
| x H | 132 | -1.219811 | -0.089489 | 0.019809  | x |

|     |     |           |           |           |   |
|-----|-----|-----------|-----------|-----------|---|
| x H | 133 | -1.053868 | -0.268480 | 0.023300  | x |
| x H | 134 | -1.158881 | -0.347609 | -0.091086 | x |
| x H | 135 | -1.320314 | -0.166942 | -0.089848 | x |
| x H | 136 | -0.551062 | -0.777358 | 0.080811  | x |
| x H | 137 | -0.664786 | -0.730115 | 0.015201  | x |
| x H | 138 | -0.871005 | -0.427994 | 0.073844  | x |
| x H | 139 | -0.750186 | -0.485904 | 0.136579  | x |
| x H | 140 | -1.014942 | -0.708067 | -0.169124 | x |
| x H | 141 | -1.045067 | -0.570096 | -0.118440 | x |
| x H | 142 | -0.752035 | -0.792230 | -0.056304 | x |
| x H | 143 | -0.907255 | -0.631892 | -0.761487 | x |
| x H | 144 | -0.686692 | -0.751359 | -0.768132 | x |
| x H | 145 | -0.660093 | -0.891951 | -0.749032 | x |
| x H | 146 | -0.789110 | -0.808051 | -0.742559 | x |
| x H | 147 | -0.685727 | -0.828944 | -0.675667 | x |
| x H | 148 | -0.637396 | -0.789897 | -0.694906 | x |
| x H | 149 | -0.856463 | -0.663735 | -0.682829 | x |
| x H | 150 | -0.762299 | -0.605365 | -0.714163 | x |
| x H | 151 | -0.891649 | -0.525579 | -0.707267 | x |
| x H | 152 | -0.983824 | -0.371377 | -0.799148 | x |
| x H | 153 | -1.037739 | -0.395844 | -0.845116 | x |
| x H | 154 | -0.904905 | -0.468210 | -0.836724 | x |
| x H | 155 | -0.674395 | -0.910111 | -0.861673 | x |
| x H | 156 | -0.658902 | -0.943502 | -0.813295 | x |
| x H | 157 | -0.601704 | -0.899837 | -0.819634 | x |
| x H | 158 | -0.771710 | -0.733631 | -0.834809 | x |
| x H | 159 | -0.852684 | -0.817311 | -0.812592 | x |
| x H | 160 | -0.861512 | -0.792401 | -0.861945 | x |
| x H | 161 | -0.925983 | -0.691858 | -0.822729 | x |
| x H | 162 | -0.741783 | -0.687249 | -0.618829 | x |
| x H | 163 | -0.832236 | -0.560091 | -0.630211 | x |
| x H | 164 | -0.706436 | -0.639481 | -0.641650 | x |
| x H | 165 | -0.764428 | 0.208410  | -0.256423 | x |
| x H | 166 | -0.824730 | 0.412722  | -0.243941 | x |
| x H | 167 | -0.951909 | 0.462182  | -0.202295 | x |
| x H | 168 | -0.913609 | 0.342523  | -0.217818 | x |
| x H | 169 | -1.001168 | 0.497642  | -0.275482 | x |
| x H | 170 | -1.064763 | 0.467819  | -0.262167 | x |
| x H | 171 | -0.943703 | 0.294394  | -0.293691 | x |
| x H | 172 | -0.843724 | 0.357219  | -0.315761 | x |
| x H | 173 | -0.808175 | 0.237611  | -0.329783 | x |
| x H | 174 | -0.531624 | 0.155650  | -0.312118 | x |
| x H | 175 | -0.472239 | 0.026447  | -0.315863 | x |
| x H | 176 | -0.472194 | 0.091501  | -0.267629 | x |
| x H | 177 | -0.850946 | 0.473264  | -0.156197 | x |
| x H | 178 | -0.775483 | 0.468174  | -0.183255 | x |



|     |     |           |          |           |   |
|-----|-----|-----------|----------|-----------|---|
| x H | 179 | -0.722536 | 0.406246 | -0.138096 | x |
| x H | 180 | -0.669597 | 0.283639 | -0.199807 | x |
| x H | 181 | -0.815948 | 0.311747 | -0.155884 | x |
| x H | 182 | -0.687087 | 0.246054 | -0.139489 | x |
| x H | 183 | -0.721502 | 0.198819 | -0.184658 | x |
| x H | 184 | -1.091211 | 0.422650 | -0.338743 | x |
| x H | 185 | -0.985376 | 0.328785 | -0.367095 | x |
| x H | 186 | -1.021466 | 0.447818 | -0.350234 | x |
| x H | 187 | -1.253643 | 0.443420 | -0.257235 | x |
| x H | 188 | -0.705752 | 0.486671 | -0.049876 | x |
| x C | 1   | -0.145584 | 1.075566 | 0.672532  | x |
| x C | 2   | -0.055717 | 1.050142 | 0.671804  | x |
| x C | 3   | 0.028686  | 0.978689 | 0.696752  | x |
| x C | 4   | 0.018664  | 0.938209 | 0.722756  | x |
| x C | 5   | -0.073434 | 0.967456 | 0.722103  | x |
| x C | 6   | 0.335717  | 1.003876 | 0.614949  | x |
| x C | 7   | 0.326737  | 0.964549 | 0.641617  | x |
| x C | 8   | 0.242076  | 0.976199 | 0.635962  | x |
| x C | 9   | 0.169408  | 1.025806 | 0.603124  | x |
| x C | 10  | 0.184990  | 1.060517 | 0.577051  | x |
| x C | 11  | 0.469945  | 0.647304 | 0.790379  | x |
| x C | 12  | 0.384069  | 0.713979 | 0.765248  | x |
| x C | 13  | 0.380864  | 0.774972 | 0.745712  | x |
| x C | 14  | 0.462437  | 0.768655 | 0.752686  | x |
| x C | 15  | 0.544949  | 0.701751 | 0.778693  | x |
| x C | 16  | 0.128019  | 0.942822 | 0.694840  | x |
| x C | 17  | 0.228585  | 0.939902 | 0.665484  | x |
| x C | 18  | 0.293379  | 0.845933 | 0.717688  | x |
| x C | 19  | 0.128099  | 1.322222 | 0.572518  | x |
| x C | 20  | 0.039566  | 1.422084 | 0.572200  | x |
| x C | 21  | -0.033652 | 1.450043 | 0.538902  | x |
| x C | 22  | -0.015367 | 1.375744 | 0.507697  | x |
| x C | 23  | 0.074960  | 1.277768 | 0.509937  | x |
| x C | 24  | -0.330029 | 1.973292 | 0.615445  | x |
| x C | 25  | 0.844039  | 0.802013 | 0.109327  | x |
| x C | 26  | -0.318491 | 1.900778 | 0.585787  | x |
| x C | 27  | -0.229652 | 1.800647 | 0.588328  | x |
| x C | 28  | -0.154928 | 1.776842 | 0.620385  | x |
| x C | 29  | -0.171560 | 1.853618 | 0.648593  | x |
| x C | 30  | -0.384963 | 1.666484 | 0.391039  | x |
| x C | 31  | -0.318779 | 1.635166 | 0.426425  | x |
| x C | 32  | -0.343945 | 1.704641 | 0.460956  | x |
| x C | 33  | -0.436684 | 1.802925 | 0.458989  | x |
| x C | 34  | -0.499166 | 1.828647 | 0.422534  | x |
| x C | 35  | -0.126052 | 1.556359 | 0.534871  | x |
| x C | 36  | -0.215941 | 1.721429 | 0.557640  | x |

|     |    |           |          |           |   |
|-----|----|-----------|----------|-----------|---|
| x C | 37 | -0.270929 | 1.675899 | 0.497905  | x |
| x C | 38 | -0.488639 | 1.616260 | 0.284116  | x |
| x C | 39 | -0.425000 | 1.529688 | 0.258527  | x |
| x C | 40 | -0.354224 | 1.516998 | 0.241852  | x |
| x C | 41 | -0.349260 | 1.591246 | 0.251810  | x |
| x C | 42 | -0.413021 | 1.674154 | 0.278408  | x |
| x C | 43 | -0.062729 | 0.990829 | 0.166610  | x |
| x C | 44 | -0.089189 | 1.081365 | 0.166306  | x |
| x C | 45 | -0.161470 | 1.165341 | 0.191139  | x |
| x C | 46 | -0.203079 | 1.154385 | 0.216221  | x |
| x C | 47 | -0.171566 | 1.061067 | 0.215600  | x |
| x C | 48 | -0.101518 | 1.450962 | 0.115226  | x |
| x C | 49 | -0.139098 | 1.443241 | 0.143332  | x |
| x C | 50 | -0.144547 | 1.369459 | 0.134871  | x |
| x C | 51 | -0.111958 | 1.305564 | 0.098463  | x |
| x C | 52 | -0.077366 | 1.319159 | 0.071501  | x |
| x C | 53 | -0.282909 | 1.427270 | 0.214787  | x |
| x C | 54 | -0.193791 | 1.263674 | 0.190285  | x |
| x C | 55 | -0.184815 | 1.358863 | 0.163720  | x |
| x C | 56 | 0.149716  | 1.201708 | 0.003966  | x |
| x C | 57 | 0.247796  | 1.111093 | 0.002387  | x |
| x C | 58 | 0.321034  | 1.094246 | 0.033774  | x |
| x C | 59 | 0.292376  | 1.169593 | 0.066163  | x |
| x C | 60 | 0.192831  | 1.258479 | 0.065726  | x |
| x C | 61 | 0.701185  | 0.623016 | -0.077939 | x |
| x C | 62 | 0.674594  | 0.686246 | -0.041652 | x |
| x C | 63 | 0.575418  | 0.777512 | -0.039762 | x |
| x C | 64 | 0.505601  | 0.800561 | -0.073945 | x |
| x C | 65 | 0.537805  | 0.733733 | -0.109090 | x |
| x C | 66 | 0.724044  | 0.959033 | 0.143381  | x |
| x C | 67 | 0.647267  | 0.975334 | 0.115309  | x |
| x C | 68 | 0.671074  | 0.900667 | 0.083303  | x |
| x C | 69 | 0.771235  | 0.812426 | 0.080348  | x |
| x C | 70 | 0.427146  | 1.000708 | 0.031264  | x |
| x C | 71 | 0.546428  | 0.851527 | -0.003376 | x |
| x C | 72 | 0.591996  | 0.913373 | 0.053136  | x |
| x C | 73 | 0.639451  | 0.841932 | 0.758645  | x |
| x C | 74 | 0.747448  | 0.750237 | 0.771509  | x |
| x C | 75 | 0.813055  | 0.725504 | 0.740780  | x |
| x C | 76 | 0.780360  | 0.704057 | 0.697012  | x |
| x C | 77 | 0.670604  | 0.792552 | 0.683714  | x |
| x C | 78 | 0.603673  | 0.823550 | 0.715177  | x |
| x C | 79 | 0.501574  | 0.961171 | 0.801546  | x |
| x C | 80 | 0.430949  | 0.972047 | 0.822325  | x |
| x C | 81 | 0.890129  | 0.668976 | 0.828411  | x |
| x C | 82 | 0.782187  | 0.763243 | 0.816760  | x |

|     |     |           |           |           |   |
|-----|-----|-----------|-----------|-----------|---|
| x C | 83  | 0.769799  | 0.856308  | 0.828865  | x |
| x C | 84  | 0.637097  | 0.767367  | 0.641122  | x |
| x C | 85  | -0.267735 | 0.773684  | 0.265749  | x |
| x C | 86  | -0.355294 | 0.815301  | 0.232276  | x |
| x C | 87  | -0.400358 | 0.920267  | 0.227106  | x |
| x C | 88  | -0.436793 | 0.990391  | 0.266661  | x |
| x C | 89  | -0.351785 | 0.947911  | 0.301782  | x |
| x C | 90  | -0.302248 | 0.841035  | 0.306091  | x |
| x C | 91  | -0.129605 | 0.611737  | 0.290016  | x |
| x C | 92  | -0.099049 | 0.516486  | 0.297175  | x |
| x C | 93  | -0.424749 | 0.775357  | 0.165829  | x |
| x C | 94  | -0.329299 | 0.745895  | 0.191553  | x |
| x C | 95  | -0.267709 | 0.742368  | 0.166562  | x |
| x C | 96  | -0.389693 | 1.015388  | 0.341785  | x |
| x C | 97  | -0.422755 | 1.257617  | 0.290410  | x |
| x C | 98  | -0.412988 | 0.630293  | 0.046584  | x |
| x C | 99  | -1.075566 | 0.145584  | -0.672532 | x |
| x C | 100 | -1.050142 | 0.055717  | -0.671804 | x |
| x C | 101 | -0.978689 | -0.028686 | -0.696752 | x |
| x C | 102 | -0.938209 | -0.018664 | -0.722756 | x |
| x C | 103 | -0.967456 | 0.073434  | -0.722103 | x |
| x C | 104 | -1.003876 | -0.335717 | -0.614949 | x |
| x C | 105 | -0.964549 | -0.326737 | -0.641617 | x |
| x C | 106 | -0.976199 | -0.242076 | -0.635962 | x |
| x C | 107 | -1.025806 | -0.169408 | -0.603124 | x |
| x C | 108 | -1.060517 | -0.184990 | -0.577051 | x |
| x C | 109 | -0.647304 | -0.469945 | -0.790379 | x |
| x C | 110 | -0.713979 | -0.384069 | -0.765248 | x |
| x C | 111 | -0.774972 | -0.380864 | -0.745712 | x |
| x C | 112 | -0.768655 | -0.462437 | -0.752686 | x |
| x C | 113 | -0.701751 | -0.544949 | -0.778693 | x |
| x C | 114 | -0.942822 | -0.128019 | -0.694840 | x |
| x C | 115 | -0.939902 | -0.228585 | -0.665484 | x |
| x C | 116 | -0.845933 | -0.293379 | -0.717688 | x |
| x C | 117 | -1.322222 | -0.128099 | -0.572518 | x |
| x C | 118 | -1.422084 | -0.039566 | -0.572200 | x |
| x C | 119 | -1.450043 | 0.033652  | -0.538902 | x |
| x C | 120 | -1.375744 | 0.015367  | -0.507697 | x |
| x C | 121 | -1.277768 | -0.074960 | -0.509937 | x |
| x C | 122 | -1.973292 | 0.330029  | -0.615445 | x |
| x C | 123 | -0.802013 | -0.844039 | -0.109327 | x |
| x C | 124 | -1.900778 | 0.318491  | -0.585787 | x |
| x C | 125 | -1.800647 | 0.229652  | -0.588328 | x |
| x C | 126 | -1.776842 | 0.154928  | -0.620385 | x |
| x C | 127 | -1.853618 | 0.171560  | -0.648593 | x |
| x C | 128 | -1.666484 | 0.384963  | -0.391039 | x |

|     |     |           |           |           |   |
|-----|-----|-----------|-----------|-----------|---|
| x C | 129 | -1.635166 | 0.318779  | -0.426425 | x |
| x C | 130 | -1.704641 | 0.343945  | -0.460956 | x |
| x C | 131 | -1.802925 | 0.436684  | -0.458989 | x |
| x C | 132 | -1.828647 | 0.499166  | -0.422534 | x |
| x C | 133 | -1.556359 | 0.126052  | -0.534871 | x |
| x C | 134 | -1.721429 | 0.215941  | -0.557640 | x |
| x C | 135 | -1.675899 | 0.270929  | -0.497905 | x |
| x C | 136 | -1.616260 | 0.488639  | -0.284116 | x |
| x C | 137 | -1.529688 | 0.425000  | -0.258527 | x |
| x C | 138 | -1.516998 | 0.354224  | -0.241852 | x |
| x C | 139 | -1.591246 | 0.349260  | -0.251810 | x |
| x C | 140 | -1.674154 | 0.413021  | -0.278408 | x |
| x C | 141 | -0.990829 | 0.062729  | -0.166610 | x |
| x C | 142 | -1.081365 | 0.089189  | -0.166306 | x |
| x C | 143 | -1.165341 | 0.161470  | -0.191139 | x |
| x C | 144 | -1.154385 | 0.203079  | -0.216221 | x |
| x C | 145 | -1.061067 | 0.171566  | -0.215600 | x |
| x C | 146 | -1.450962 | 0.101518  | -0.115226 | x |
| x C | 147 | -1.443241 | 0.139098  | -0.143332 | x |
| x C | 148 | -1.369459 | 0.144547  | -0.134871 | x |
| x C | 149 | -1.305564 | 0.111958  | -0.098463 | x |
| x C | 150 | -1.319159 | 0.077366  | -0.071501 | x |
| x C | 151 | -1.427270 | 0.282909  | -0.214787 | x |
| x C | 152 | -1.263674 | 0.193791  | -0.190285 | x |
| x C | 153 | -1.358863 | 0.184815  | -0.163720 | x |
| x C | 154 | -1.201708 | -0.149716 | -0.003966 | x |
| x C | 155 | -1.111093 | -0.247796 | -0.002387 | x |
| x C | 156 | -1.094246 | -0.321034 | -0.033774 | x |
| x C | 157 | -1.169593 | -0.292376 | -0.066163 | x |
| x C | 158 | -1.258479 | -0.192831 | -0.065726 | x |
| x C | 159 | -0.623016 | -0.701185 | 0.077939  | x |
| x C | 160 | -0.686246 | -0.674594 | 0.041652  | x |
| x C | 161 | -0.777512 | -0.575418 | 0.039762  | x |
| x C | 162 | -0.800561 | -0.505601 | 0.073945  | x |
| x C | 163 | -0.733733 | -0.537805 | 0.109090  | x |
| x C | 164 | -0.959033 | -0.724044 | -0.143381 | x |
| x C | 165 | -0.975334 | -0.647267 | -0.115309 | x |
| x C | 166 | -0.900667 | -0.671074 | -0.083303 | x |
| x C | 167 | -0.812426 | -0.771235 | -0.080348 | x |
| x C | 168 | -1.000708 | -0.427146 | -0.031264 | x |
| x C | 169 | -0.851527 | -0.546428 | 0.003376  | x |
| x C | 170 | -0.913373 | -0.591996 | -0.053136 | x |
| x C | 171 | -0.841932 | -0.639451 | -0.758645 | x |
| x C | 172 | -0.750237 | -0.747448 | -0.771509 | x |
| x C | 173 | -0.725504 | -0.813055 | -0.740780 | x |
| x C | 174 | -0.704057 | -0.780360 | -0.697012 | x |

|     |     |           |           |           |   |
|-----|-----|-----------|-----------|-----------|---|
| x C | 175 | -0.792552 | -0.670604 | -0.683714 | x |
| x C | 176 | -0.823550 | -0.603673 | -0.715177 | x |
| x C | 177 | -0.961171 | -0.501574 | -0.801546 | x |
| x C | 178 | -0.972047 | -0.430949 | -0.822325 | x |
| x C | 179 | -0.668976 | -0.890129 | -0.828411 | x |
| x C | 180 | -0.763243 | -0.782187 | -0.816760 | x |
| x C | 181 | -0.856308 | -0.769799 | -0.828865 | x |
| x C | 182 | -0.767367 | -0.637097 | -0.641122 | x |
| x C | 183 | -0.773684 | 0.267735  | -0.265749 | x |
| x C | 184 | -0.815301 | 0.355294  | -0.232276 | x |
| x C | 185 | -0.920267 | 0.400358  | -0.227106 | x |
| x C | 186 | -0.990391 | 0.436793  | -0.266661 | x |
| x C | 187 | -0.947911 | 0.351785  | -0.301782 | x |
| x C | 188 | -0.841035 | 0.302248  | -0.306091 | x |
| x C | 189 | -0.611737 | 0.129605  | -0.290016 | x |
| x C | 190 | -0.516486 | 0.099049  | -0.297175 | x |
| x C | 191 | -0.775357 | 0.424749  | -0.165829 | x |
| x C | 192 | -0.745895 | 0.329299  | -0.191553 | x |
| x C | 193 | -0.742368 | 0.267709  | -0.166562 | x |
| x C | 194 | -1.015388 | 0.389693  | -0.341785 | x |
| x C | 195 | -1.257617 | 0.422755  | -0.290410 | x |
| x C | 196 | -0.630293 | 0.412988  | -0.046584 | x |
| x N | 1   | -0.153968 | 1.033837  | 0.696967  | x |
| x N | 2   | 0.266468  | 1.050192  | 0.582869  | x |
| x N | 3   | 0.548991  | 0.641259  | 0.796964  | x |
| x N | 4   | 0.136329  | 0.975189  | 0.665936  | x |
| x N | 5   | 0.309791  | 0.874181  | 0.690233  | x |
| x N | 6   | 0.204147  | 0.878257  | 0.721563  | x |
| x N | 7   | 0.146369  | 1.251074  | 0.541866  | x |
| x N | 8   | -0.257733 | 1.950458  | 0.646336  | x |
| x N | 9   | -0.473661 | 1.761888  | 0.388935  | x |
| x N | 10  | -0.134712 | 1.625241  | 0.563921  | x |
| x N | 11  | -0.285602 | 1.750509  | 0.524953  | x |
| x N | 12  | -0.192839 | 1.577434  | 0.501795  | x |
| x N | 13  | -0.482116 | 1.687035  | 0.294342  | x |
| x N | 14  | -0.103180 | 0.980566  | 0.190906  | x |
| x N | 15  | -0.071937 | 1.390605  | 0.079671  | x |
| x N | 16  | -0.257245 | 1.340408  | 0.217190  | x |
| x N | 17  | -0.158129 | 1.269789  | 0.162038  | x |
| x N | 18  | -0.247007 | 1.439857  | 0.189289  | x |
| x N | 19  | 0.122416  | 1.274808  | 0.035122  | x |
| x N | 20  | 0.634206  | 0.646633  | -0.111382 | x |
| x N | 21  | 0.820990  | 0.873856  | 0.140410  | x |
| x N | 22  | 0.448103  | 0.927859  | 0.001208  | x |
| x N | 23  | 0.620952  | 0.840665  | 0.021877  | x |
| x N | 24  | 0.495813  | 0.996818  | 0.058274  | x |

|      |    |           |           |           |   |
|------|----|-----------|-----------|-----------|---|
| x N  | 25 | -1.033837 | 0.153968  | -0.696967 | x |
| x N  | 26 | -1.050192 | -0.266468 | -0.582869 | x |
| x N  | 27 | -0.641259 | -0.548991 | -0.796964 | x |
| x N  | 28 | -0.975189 | -0.136329 | -0.665936 | x |
| x N  | 29 | -0.874181 | -0.309791 | -0.690233 | x |
| x N  | 30 | -0.878257 | -0.204147 | -0.721563 | x |
| x N  | 31 | -1.251074 | -0.146369 | -0.541866 | x |
| x N  | 32 | -1.950458 | 0.257733  | -0.646336 | x |
| x N  | 33 | -1.761888 | 0.473661  | -0.388935 | x |
| x N  | 34 | -1.625241 | 0.134712  | -0.563921 | x |
| x N  | 35 | -1.750509 | 0.285602  | -0.524953 | x |
| x N  | 36 | -1.577434 | 0.192839  | -0.501795 | x |
| x N  | 37 | -1.687035 | 0.482116  | -0.294342 | x |
| x N  | 38 | -0.980566 | 0.103180  | -0.190906 | x |
| x N  | 39 | -1.390605 | 0.071937  | -0.079671 | x |
| x N  | 40 | -1.340408 | 0.257245  | -0.217190 | x |
| x N  | 41 | -1.269789 | 0.158129  | -0.162038 | x |
| x N  | 42 | -1.439857 | 0.247007  | -0.189289 | x |
| x N  | 43 | -1.274808 | -0.122416 | -0.035122 | x |
| x N  | 44 | -0.646633 | -0.634206 | 0.111382  | x |
| x N  | 45 | -0.873856 | -0.820990 | -0.140410 | x |
| x N  | 46 | -0.927859 | -0.448103 | -0.001208 | x |
| x N  | 47 | -0.840665 | -0.620952 | -0.021877 | x |
| x N  | 48 | -0.996818 | -0.495813 | -0.058274 | x |
| x O  | 1  | 0.573066  | 0.864752  | 0.785800  | x |
| x O  | 2  | 0.494295  | 1.031012  | 0.798416  | x |
| x O  | 3  | -0.225212 | 0.674478  | 0.272097  | x |
| x O  | 4  | -0.075559 | 0.631107  | 0.298627  | x |
| x O  | 5  | -0.864752 | -0.573066 | -0.785800 | x |
| x O  | 6  | -1.031012 | -0.494295 | -0.798416 | x |
| x O  | 7  | -0.674478 | 0.225212  | -0.272097 | x |
| x O  | 8  | -0.631107 | 0.075559  | -0.298627 | x |
| x Cl | 1  | -0.390848 | 1.332196  | 0.302797  | x |
| x Cl | 2  | -0.527889 | 1.311547  | 0.314736  | x |
| x Cl | 3  | -0.318521 | 1.133053  | 0.302394  | x |
| x Cl | 4  | -0.322449 | 0.642253  | 0.060126  | x |
| x Cl | 5  | -0.409917 | 0.579330  | -0.004893 | x |
| x Cl | 6  | -0.397468 | 0.559434  | 0.080362  | x |
| x Cl | 7  | -1.332196 | 0.390848  | -0.302797 | x |
| x Cl | 8  | -1.311547 | 0.527889  | -0.314736 | x |
| x Cl | 9  | -1.133053 | 0.318521  | -0.302394 | x |
| x Cl | 10 | -0.642253 | 0.322449  | -0.060126 | x |
| x Cl | 11 | -0.579330 | 0.409917  | 0.004893  | x |
| x Cl | 12 | -0.559434 | 0.397468  | -0.080362 | x |
| x Zn | 1  | -0.283081 | 1.060435  | 0.692222  | x |
| x Zn | 2  | 0.283369  | 1.104137  | 0.542112  | x |

|      |    |           |           |           |   |
|------|----|-----------|-----------|-----------|---|
| x Zn | 3  | 0.931941  | 0.846244  | 0.185958  | x |
| x Zn | 4  | -0.569789 | 1.812710  | 0.335332  | x |
| x Zn | 5  | -0.025492 | 1.409268  | 0.035794  | x |
| x Zn | 6  | 0.674106  | 0.545989  | -0.163862 | x |
| x Zn | 7  | -1.060435 | 0.283081  | -0.692222 | x |
| x Zn | 8  | -1.104137 | -0.283369 | -0.542112 | x |
| x Zn | 9  | -0.846244 | -0.931941 | -0.185958 | x |
| x Zn | 10 | -1.812710 | 0.569789  | -0.335332 | x |
| x Zn | 11 | -1.409268 | 0.025492  | -0.035794 | x |
| x Zn | 12 | -0.545989 | -0.674106 | 0.163862  | x |
| x Br | 1  | -0.269750 | 1.004141  | 0.752178  | x |
| x Br | 2  | -0.415395 | 1.214663  | 0.664673  | x |
| x Br | 3  | 0.410437  | 1.104420  | 0.577000  | x |
| x Br | 4  | 0.283393  | 1.027769  | 0.475544  | x |
| x Br | 5  | 1.082303  | 0.720441  | 0.153977  | x |
| x Br | 6  | 0.889085  | 0.839848  | 0.244819  | x |
| x Br | 7  | -0.568863 | 1.933777  | 0.322064  | x |
| x Br | 8  | -0.713435 | 1.838820  | 0.334825  | x |
| x Br | 9  | -0.032903 | 1.543604  | 0.064533  | x |
| x Br | 10 | -0.105510 | 1.400258  | -0.028180 | x |
| x Br | 11 | 0.810040  | 0.502989  | -0.189727 | x |
| x Br | 12 | 0.668989  | 0.428683  | -0.152554 | x |
| x Br | 13 | -1.004141 | 0.269750  | -0.752178 | x |
| x Br | 14 | -1.214663 | 0.415395  | -0.664673 | x |
| x Br | 15 | -1.104420 | -0.410437 | -0.577000 | x |
| x Br | 16 | -1.027769 | -0.283393 | -0.475544 | x |
| x Br | 17 | -0.720441 | -1.082303 | -0.153977 | x |
| x Br | 18 | -0.839848 | -0.889085 | -0.244819 | x |
| x Br | 19 | -1.933777 | 0.568863  | -0.322064 | x |
| x Br | 20 | -1.838820 | 0.713435  | -0.334825 | x |
| x Br | 21 | -1.543604 | 0.032903  | -0.064533 | x |
| x Br | 22 | -1.400258 | 0.105510  | 0.028180  | x |
| x Br | 23 | -0.502989 | -0.810040 | 0.189727  | x |
| x Br | 24 | -0.428683 | -0.668989 | 0.152554  | x |

**Table S9.** Fractional atomic coordinates of the optimised structure of (1*R*)-(-)-menthyl acetate@**1c**

| x | Element | Atom   | Fractional coordinates of atoms |          |          | x |
|---|---------|--------|---------------------------------|----------|----------|---|
| x |         | Number | u                               | v        | w        | x |
| x | -----x  |        |                                 |          |          |   |
| x | H       | 1      | 0.817519                        | 0.955211 | 1.136341 | x |
| x | H       | 2      | 0.692872                        | 1.003998 | 1.074383 | x |
| x | H       | 3      | 0.915498                        | 0.699563 | 1.016754 | x |
| x | H       | 4      | 1.031433                        | 0.661152 | 1.081190 | x |
| x | H       | 5      | 0.240675                        | 1.261927 | 0.910851 | x |
| x | H       | 6      | 0.405544                        | 1.078105 | 0.910716 | x |
| x | H       | 7      | 0.513037                        | 1.165278 | 1.022768 | x |
| x | H       | 8      | 0.342746                        | 1.345799 | 1.019058 | x |
| x | H       | 9      | 0.846154                        | 0.502673 | 0.883785 | x |
| x | H       | 10     | 0.826985                        | 0.631929 | 0.939237 | x |
| x | H       | 11     | 0.521971                        | 0.857552 | 0.882601 | x |
| x | H       | 12     | 0.553681                        | 0.721253 | 0.829006 | x |
| x | H       | 13     | 0.041416                        | 1.557084 | 0.887333 | x |
| x | H       | 14     | 0.055740                        | 1.628041 | 0.837600 | x |
| x | H       | 15     | 0.337600                        | 1.527289 | 0.907079 | x |
| x | H       | 16     | 0.308815                        | 1.465819 | 0.955843 | x |
| x | H       | 17     | -0.060738                       | 1.977741 | 0.701322 | x |
| x | H       | 18     | 0.098220                        | 1.859369 | 0.748570 | x |
| x | H       | 19     | -0.027727                       | 1.736468 | 0.762774 | x |
| x | H       | 20     | -0.177208                       | 1.854235 | 0.713875 | x |
| x | H       | 21     | 0.654366                        | 1.429426 | 0.845137 | x |
| x | H       | 22     | 0.486514                        | 1.481285 | 0.849647 | x |
| x | H       | 23     | 0.347675                        | 1.688992 | 0.760744 | x |
| x | H       | 24     | 0.520721                        | 1.627647 | 0.758587 | x |
| x | H       | 25     | -0.334498                       | 2.014806 | 0.579481 | x |
| x | H       | 26     | -0.292170                       | 1.899483 | 0.514510 | x |
| x | H       | 27     | 0.008695                        | 1.675836 | 0.574196 | x |
| x | H       | 28     | -0.044128                       | 1.798490 | 0.637028 | x |
| x | H       | 29     | -0.279954                       | 1.555211 | 0.323891 | x |
| x | H       | 30     | -0.139126                       | 1.522772 | 0.375173 | x |
| x | H       | 31     | -0.363524                       | 1.819143 | 0.438313 | x |
| x | H       | 32     | -0.496754                       | 1.838559 | 0.384680 | x |
| x | H       | 33     | 0.348604                        | 1.317296 | 0.515541 | x |
| x | H       | 34     | 0.170473                        | 1.490225 | 0.520802 | x |
| x | H       | 35     | 0.082191                        | 1.403651 | 0.401815 | x |
| x | H       | 36     | 0.263056                        | 1.238419 | 0.400325 | x |
| x | H       | 37     | -0.576679                       | 1.657991 | 0.345466 | x |
| x | H       | 38     | -0.524983                       | 1.490243 | 0.349601 | x |
| x | H       | 39     | -0.320273                       | 1.353199 | 0.259491 | x |
| x | H       | 40     | -0.380507                       | 1.526766 | 0.258538 | x |



|     |    |           |          |          |   |
|-----|----|-----------|----------|----------|---|
| x H | 41 | -0.550024 | 1.302992 | 0.447610 | x |
| x H | 42 | -0.489708 | 1.338363 | 0.401361 | x |
| x H | 43 | -0.360605 | 1.046498 | 0.334119 | x |
| x H | 44 | -0.431308 | 1.025098 | 0.380972 | x |
| x H | 45 | -0.022974 | 0.963584 | 0.201401 | x |
| x H | 46 | -0.149173 | 1.118127 | 0.248561 | x |
| x H | 47 | -0.245054 | 0.965804 | 0.261828 | x |
| x H | 48 | -0.120402 | 0.820904 | 0.213262 | x |
| x H | 49 | 0.199656  | 1.341125 | 0.756780 | x |
| x H | 50 | 0.324495  | 1.118211 | 0.766589 | x |
| x H | 51 | 0.469626  | 1.095520 | 0.753287 | x |
| x H | 52 | 0.382269  | 1.224466 | 0.743436 | x |
| x H | 53 | 0.419050  | 1.107242 | 0.678467 | x |
| x H | 54 | 0.377822  | 1.059674 | 0.697664 | x |
| x H | 55 | 0.247599  | 1.277977 | 0.679264 | x |
| x H | 56 | 0.184965  | 1.184483 | 0.709874 | x |
| x H | 57 | 0.103981  | 1.313896 | 0.700161 | x |
| x H | 58 | -0.063162 | 1.423122 | 0.798417 | x |
| x H | 59 | -0.023301 | 1.461478 | 0.845776 | x |
| x H | 60 | 0.039629  | 1.329754 | 0.830829 | x |
| x H | 61 | 0.460061  | 1.117250 | 0.866185 | x |
| x H | 62 | 0.450512  | 1.041106 | 0.824838 | x |
| x H | 63 | 0.509949  | 1.085106 | 0.819834 | x |
| x H | 64 | 0.285656  | 1.219659 | 0.831703 | x |
| x H | 65 | 0.393985  | 1.281282 | 0.813828 | x |
| x H | 66 | 0.353359  | 1.303807 | 0.861591 | x |
| x H | 67 | 0.262113  | 1.364056 | 0.818755 | x |
| x H | 68 | 0.286580  | 1.144956 | 0.618403 | x |
| x H | 69 | 0.154574  | 1.239194 | 0.625211 | x |
| x H | 70 | 0.232177  | 1.116740 | 0.641804 | x |
| x H | 71 | -0.777168 | 1.274677 | 0.318234 | x |
| x H | 72 | -0.655550 | 1.238825 | 0.329452 | x |
| x H | 73 | -0.720936 | 1.381988 | 0.295000 | x |
| x H | 74 | -0.925614 | 1.437087 | 0.280100 | x |
| x H | 75 | -0.899834 | 1.506228 | 0.267577 | x |
| x H | 76 | -0.777717 | 1.359026 | 0.219645 | x |
| x H | 77 | -0.899048 | 1.396484 | 0.206118 | x |
| x H | 78 | -0.842561 | 1.261374 | 0.244749 | x |
| x H | 79 | -0.633343 | 1.196964 | 0.256306 | x |
| x H | 80 | -0.593425 | 0.962062 | 0.304862 | x |
| x H | 81 | -0.460555 | 0.896819 | 0.310923 | x |
| x H | 82 | -0.523918 | 0.899601 | 0.261653 | x |
| x H | 83 | -0.901501 | 1.216071 | 0.182038 | x |
| x H | 84 | -0.905120 | 1.293823 | 0.156702 | x |
| x H | 85 | -0.838108 | 1.164247 | 0.137446 | x |
| x H | 86 | -0.714811 | 1.108033 | 0.199887 | x |

|     |     |           |           |           |   |
|-----|-----|-----------|-----------|-----------|---|
| x H | 87  | -0.739854 | 1.255494  | 0.157210  | x |
| x H | 88  | -0.671531 | 1.124358  | 0.141487  | x |
| x H | 89  | -0.626889 | 1.162045  | 0.187170  | x |
| x H | 90  | -0.842995 | 1.525081  | 0.344495  | x |
| x H | 91  | -0.865243 | 1.450851  | 0.355171  | x |
| x H | 92  | -0.743218 | 1.412972  | 0.369453  | x |
| x H | 93  | 0.315591  | 0.886304  | 0.743503  | x |
| x H | 94  | -0.955211 | -0.817519 | -1.136341 | x |
| x H | 95  | -1.003998 | -0.692872 | -1.074383 | x |
| x H | 96  | -0.699563 | -0.915498 | -1.016754 | x |
| x H | 97  | -0.661152 | -1.031433 | -1.081190 | x |
| x H | 98  | -1.261927 | -0.240675 | -0.910851 | x |
| x H | 99  | -1.078105 | -0.405544 | -0.910716 | x |
| x H | 100 | -1.165278 | -0.513037 | -1.022768 | x |
| x H | 101 | -1.345799 | -0.342746 | -1.019058 | x |
| x H | 102 | -0.502673 | -0.846154 | -0.883785 | x |
| x H | 103 | -0.631929 | -0.826985 | -0.939237 | x |
| x H | 104 | -0.857552 | -0.521971 | -0.882601 | x |
| x H | 105 | -0.721253 | -0.553681 | -0.829006 | x |
| x H | 106 | -1.557084 | -0.041416 | -0.887333 | x |
| x H | 107 | -1.628041 | -0.055740 | -0.837600 | x |
| x H | 108 | -1.527289 | -0.337600 | -0.907079 | x |
| x H | 109 | -1.465819 | -0.308815 | -0.955843 | x |
| x H | 110 | -1.977741 | 0.060738  | -0.701322 | x |
| x H | 111 | -1.859369 | -0.098220 | -0.748570 | x |
| x H | 112 | -1.736468 | 0.027727  | -0.762774 | x |
| x H | 113 | -1.854235 | 0.177208  | -0.713875 | x |
| x H | 114 | -1.429426 | -0.654366 | -0.845137 | x |
| x H | 115 | -1.481285 | -0.486514 | -0.849647 | x |
| x H | 116 | -1.688992 | -0.347675 | -0.760744 | x |
| x H | 117 | -1.627647 | -0.520721 | -0.758587 | x |
| x H | 118 | -2.014806 | 0.334498  | -0.579481 | x |
| x H | 119 | -1.899483 | 0.292170  | -0.514510 | x |
| x H | 120 | -1.675836 | -0.008695 | -0.574196 | x |
| x H | 121 | -1.798490 | 0.044128  | -0.637028 | x |
| x H | 122 | -1.555211 | 0.279954  | -0.323891 | x |
| x H | 123 | -1.522772 | 0.139126  | -0.375173 | x |
| x H | 124 | -1.819143 | 0.363524  | -0.438313 | x |
| x H | 125 | -1.838559 | 0.496754  | -0.384680 | x |
| x H | 126 | -1.317296 | -0.348604 | -0.515541 | x |
| x H | 127 | -1.490225 | -0.170473 | -0.520802 | x |
| x H | 128 | -1.403651 | -0.082191 | -0.401815 | x |
| x H | 129 | -1.238419 | -0.263056 | -0.400325 | x |
| x H | 130 | -1.657991 | 0.576679  | -0.345466 | x |
| x H | 131 | -1.490243 | 0.524983  | -0.349601 | x |
| x H | 132 | -1.353199 | 0.320273  | -0.259491 | x |

|     |     |           |           |           |   |
|-----|-----|-----------|-----------|-----------|---|
| x H | 133 | -1.526766 | 0.380507  | -0.258538 | x |
| x H | 134 | -1.302992 | 0.550024  | -0.447610 | x |
| x H | 135 | -1.338363 | 0.489708  | -0.401361 | x |
| x H | 136 | -1.046498 | 0.360605  | -0.334119 | x |
| x H | 137 | -1.025098 | 0.431308  | -0.380972 | x |
| x H | 138 | -0.963584 | 0.022974  | -0.201401 | x |
| x H | 139 | -1.118127 | 0.149173  | -0.248561 | x |
| x H | 140 | -0.965804 | 0.245054  | -0.261828 | x |
| x H | 141 | -0.820904 | 0.120402  | -0.213262 | x |
| x H | 142 | -1.341125 | -0.199656 | -0.756780 | x |
| x H | 143 | -1.118211 | -0.324495 | -0.766589 | x |
| x H | 144 | -1.095520 | -0.469626 | -0.753287 | x |
| x H | 145 | -1.224466 | -0.382269 | -0.743436 | x |
| x H | 146 | -1.107242 | -0.419050 | -0.678467 | x |
| x H | 147 | -1.059674 | -0.377822 | -0.697664 | x |
| x H | 148 | -1.277977 | -0.247599 | -0.679264 | x |
| x H | 149 | -1.184483 | -0.184965 | -0.709874 | x |
| x H | 150 | -1.313896 | -0.103981 | -0.700161 | x |
| x H | 151 | -1.423122 | 0.063162  | -0.798417 | x |
| x H | 152 | -1.461478 | 0.023301  | -0.845776 | x |
| x H | 153 | -1.329754 | -0.039629 | -0.830829 | x |
| x H | 154 | -1.117250 | -0.460061 | -0.866185 | x |
| x H | 155 | -1.041106 | -0.450512 | -0.824838 | x |
| x H | 156 | -1.085106 | -0.509949 | -0.819834 | x |
| x H | 157 | -1.219659 | -0.285656 | -0.831703 | x |
| x H | 158 | -1.281282 | -0.393985 | -0.813828 | x |
| x H | 159 | -1.303807 | -0.353359 | -0.861591 | x |
| x H | 160 | -1.364056 | -0.262113 | -0.818755 | x |
| x H | 161 | -1.144956 | -0.286580 | -0.618403 | x |
| x H | 162 | -1.239194 | -0.154574 | -0.625211 | x |
| x H | 163 | -1.116740 | -0.232177 | -0.641804 | x |
| x H | 164 | -1.274677 | 0.777168  | -0.318234 | x |
| x H | 165 | -1.238825 | 0.655550  | -0.329452 | x |
| x H | 166 | -1.381988 | 0.720936  | -0.295000 | x |
| x H | 167 | -1.437087 | 0.925614  | -0.280100 | x |
| x H | 168 | -1.506228 | 0.899834  | -0.267577 | x |
| x H | 169 | -1.359026 | 0.777717  | -0.219645 | x |
| x H | 170 | -1.396484 | 0.899048  | -0.206118 | x |
| x H | 171 | -1.261374 | 0.842561  | -0.244749 | x |
| x H | 172 | -1.196964 | 0.633343  | -0.256306 | x |
| x H | 173 | -0.962062 | 0.593425  | -0.304862 | x |
| x H | 174 | -0.896819 | 0.460555  | -0.310923 | x |
| x H | 175 | -0.899601 | 0.523918  | -0.261653 | x |
| x H | 176 | -1.216071 | 0.901501  | -0.182038 | x |
| x H | 177 | -1.293823 | 0.905120  | -0.156702 | x |
| x H | 178 | -1.164247 | 0.838108  | -0.137446 | x |

|     |     |           |           |           |   |
|-----|-----|-----------|-----------|-----------|---|
| x H | 179 | -1.108033 | 0.714811  | -0.199887 | x |
| x H | 180 | -1.255494 | 0.739854  | -0.157210 | x |
| x H | 181 | -1.124358 | 0.671531  | -0.141487 | x |
| x H | 182 | -1.162045 | 0.626889  | -0.187170 | x |
| x H | 183 | -1.525081 | 0.842995  | -0.344495 | x |
| x H | 184 | -1.450851 | 0.865243  | -0.355171 | x |
| x H | 185 | -1.412972 | 0.743218  | -0.369453 | x |
| x H | 186 | -0.886304 | -0.315591 | -0.743503 | x |
| x C | 1   | 0.836792  | 0.900579  | 1.109294  | x |
| x C | 2   | 0.767588  | 0.927822  | 1.074584  | x |
| x C | 3   | 0.794169  | 0.855700  | 1.040478  | x |
| x C | 4   | 0.890816  | 0.758257  | 1.042495  | x |
| x C | 5   | 0.955858  | 0.736345  | 1.078448  | x |
| x C | 6   | 0.303964  | 1.236666  | 0.934601  | x |
| x C | 7   | 0.394429  | 1.135990  | 0.934673  | x |
| x C | 8   | 0.471558  | 1.109366  | 0.966598  | x |
| x C | 9   | 0.454604  | 1.184941  | 0.997349  | x |
| x C | 10  | 0.362115  | 1.283727  | 0.995502  | x |
| x C | 11  | 0.775659  | 0.582227  | 0.885048  | x |
| x C | 12  | 0.764059  | 0.654239  | 0.915866  | x |
| x C | 13  | 0.672243  | 0.755188  | 0.915523  | x |
| x C | 14  | 0.594635  | 0.779985  | 0.884167  | x |
| x C | 15  | 0.612042  | 0.703955  | 0.854181  | x |
| x C | 16  | 0.719014  | 0.882453  | 1.004100  | x |
| x C | 17  | 0.566927  | 1.002262  | 0.969564  | x |
| x C | 18  | 0.659100  | 0.834714  | 0.946660  | x |
| x C | 19  | 0.104152  | 1.554642  | 0.890957  | x |
| x C | 20  | 0.112701  | 1.593413  | 0.863668  | x |
| x C | 21  | 0.197278  | 1.584165  | 0.869110  | x |
| x C | 22  | 0.270448  | 1.536496  | 0.902397  | x |
| x C | 23  | 0.255473  | 1.501622  | 0.928961  | x |
| x C | 24  | -0.048572 | 1.921870  | 0.715582  | x |
| x C | 25  | 0.038022  | 1.857269  | 0.741522  | x |
| x C | 26  | 0.046838  | 1.789240  | 0.759120  | x |
| x C | 27  | -0.031908 | 1.788813  | 0.750025  | x |
| x C | 28  | -0.114863 | 1.853367  | 0.722905  | x |
| x C | 29  | 0.584086  | 1.486310  | 0.827081  | x |
| x C | 30  | 0.492325  | 1.514327  | 0.829071  | x |
| x C | 31  | 0.405338  | 1.588716  | 0.805282  | x |
| x C | 32  | 0.414638  | 1.630154  | 0.779099  | x |
| x C | 33  | 0.509133  | 1.597604  | 0.778265  | x |
| x C | 34  | 0.208350  | 1.622299  | 0.839138  | x |
| x C | 35  | 0.137927  | 1.716727  | 0.786130  | x |
| x C | 36  | 0.305464  | 1.623848  | 0.808563  | x |
| x C | 37  | -0.259170 | 1.939171  | 0.577087  | x |
| x C | 38  | -0.235320 | 1.874588  | 0.540994  | x |

|     |    |           |          |          |   |
|-----|----|-----------|----------|----------|---|
| x C | 39 | -0.138083 | 1.777609 | 0.539562 | x |
| x C | 40 | -0.067371 | 1.750529 | 0.574184 | x |
| x C | 41 | -0.096835 | 1.818892 | 0.609249 | x |
| x C | 42 | -0.295245 | 1.611314 | 0.349848 | x |
| x C | 43 | -0.217264 | 1.593679 | 0.378380 | x |
| x C | 44 | -0.241187 | 1.668834 | 0.410864 | x |
| x C | 45 | -0.342516 | 1.758462 | 0.413904 | x |
| x C | 46 | -0.416503 | 1.770081 | 0.384298 | x |
| x C | 47 | 0.286818  | 1.341906 | 0.491033 | x |
| x C | 48 | 0.189499  | 1.436000 | 0.493738 | x |
| x C | 49 | 0.113606  | 1.459548 | 0.461660 | x |
| x C | 50 | 0.139329  | 1.388470 | 0.427293 | x |
| x C | 51 | 0.239071  | 1.296658 | 0.426387 | x |
| x C | 52 | -0.111120 | 1.704177 | 0.502520 | x |
| x C | 53 | -0.160249 | 1.653188 | 0.441856 | x |
| x C | 54 | 0.007149  | 1.555469 | 0.465545 | x |
| x C | 55 | -0.520045 | 1.587964 | 0.327260 | x |
| x C | 56 | -0.491757 | 1.496065 | 0.329126 | x |
| x C | 57 | -0.417930 | 1.409830 | 0.304945 | x |
| x C | 58 | -0.377820 | 1.419689 | 0.278385 | x |
| x C | 59 | -0.409683 | 1.513938 | 0.278085 | x |
| x C | 60 | -0.508323 | 1.248803 | 0.421829 | x |
| x C | 61 | -0.473999 | 1.267580 | 0.396729 | x |
| x C | 62 | -0.418726 | 1.193437 | 0.364775 | x |
| x C | 63 | -0.401229 | 1.104191 | 0.359214 | x |
| x C | 64 | -0.440180 | 1.091964 | 0.384902 | x |
| x C | 65 | -0.074492 | 0.968778 | 0.215589 | x |
| x C | 66 | -0.142942 | 1.052485 | 0.241469 | x |
| x C | 67 | -0.204943 | 1.052015 | 0.258800 | x |
| x C | 68 | -0.196870 | 0.967785 | 0.249217 | x |
| x C | 69 | -0.128440 | 0.887724 | 0.222328 | x |
| x C | 70 | -0.380651 | 1.309091 | 0.307958 | x |
| x C | 71 | -0.380397 | 1.207730 | 0.336178 | x |
| x C | 72 | -0.280712 | 1.140651 | 0.285655 | x |
| x C | 73 | 0.209777  | 1.273306 | 0.754173 | x |
| x C | 74 | 0.318404  | 1.184357 | 0.770533 | x |
| x C | 75 | 0.390171  | 1.158284 | 0.742336 | x |
| x C | 76 | 0.366087  | 1.128066 | 0.698294 | x |
| x C | 77 | 0.256299  | 1.212594 | 0.681389 | x |
| x C | 78 | 0.182295  | 1.247184 | 0.710310 | x |
| x C | 79 | 0.072997  | 1.391966 | 0.798693 | x |
| x C | 80 | 0.003203  | 1.401610 | 0.820164 | x |
| x C | 81 | 0.446978  | 1.105807 | 0.832699 | x |
| x C | 82 | 0.344078  | 1.202475 | 0.816547 | x |
| x C | 83 | 0.337781  | 1.293173 | 0.828138 | x |
| x C | 84 | 0.230643  | 1.176983 | 0.639219 | x |

|     |     |           |           |           |   |
|-----|-----|-----------|-----------|-----------|---|
| x C | 85  | -0.724127 | 1.273866  | 0.307257  | x |
| x C | 86  | -0.776320 | 1.383582  | 0.304185  | x |
| x C | 87  | -0.866211 | 1.429098  | 0.270746  | x |
| x C | 88  | -0.833486 | 1.362500  | 0.229711  | x |
| x C | 89  | -0.785594 | 1.254349  | 0.233363  | x |
| x C | 90  | -0.694589 | 1.208819  | 0.266072  | x |
| x C | 91  | -0.556927 | 1.037871  | 0.285507  | x |
| x C | 92  | -0.532630 | 0.943998  | 0.291493  | x |
| x C | 93  | -0.856616 | 1.216740  | 0.165647  | x |
| x C | 94  | -0.759860 | 1.185550  | 0.192130  | x |
| x C | 95  | -0.695591 | 1.181564  | 0.168347  | x |
| x C | 96  | -0.808738 | 1.446962  | 0.345728  | x |
| x C | 97  | 0.306113  | 0.865214  | 0.710648  | x |
| x C | 98  | -0.900579 | -0.836792 | -1.109294 | x |
| x C | 99  | -0.927822 | -0.767588 | -1.074584 | x |
| x C | 100 | -0.855700 | -0.794169 | -1.040478 | x |
| x C | 101 | -0.758257 | -0.890816 | -1.042495 | x |
| x C | 102 | -0.736345 | -0.955858 | -1.078448 | x |
| x C | 103 | -1.236666 | -0.303964 | -0.934601 | x |
| x C | 104 | -1.135990 | -0.394429 | -0.934673 | x |
| x C | 105 | -1.109366 | -0.471558 | -0.966598 | x |
| x C | 106 | -1.184941 | -0.454604 | -0.997349 | x |
| x C | 107 | -1.283727 | -0.362115 | -0.995502 | x |
| x C | 108 | -0.582227 | -0.775659 | -0.885048 | x |
| x C | 109 | -0.654239 | -0.764059 | -0.915866 | x |
| x C | 110 | -0.755188 | -0.672243 | -0.915523 | x |
| x C | 111 | -0.779985 | -0.594635 | -0.884167 | x |
| x C | 112 | -0.703955 | -0.612042 | -0.854181 | x |
| x C | 113 | -0.882453 | -0.719014 | -1.004100 | x |
| x C | 114 | -1.002262 | -0.566927 | -0.969564 | x |
| x C | 115 | -0.834714 | -0.659100 | -0.946660 | x |
| x C | 116 | -1.554642 | -0.104152 | -0.890957 | x |
| x C | 117 | -1.593413 | -0.112701 | -0.863668 | x |
| x C | 118 | -1.584165 | -0.197278 | -0.869110 | x |
| x C | 119 | -1.536496 | -0.270448 | -0.902397 | x |
| x C | 120 | -1.501622 | -0.255473 | -0.928961 | x |
| x C | 121 | -1.921870 | 0.048572  | -0.715582 | x |
| x C | 122 | -1.857269 | -0.038022 | -0.741522 | x |
| x C | 123 | -1.789240 | -0.046838 | -0.759120 | x |
| x C | 124 | -1.788813 | 0.031908  | -0.750025 | x |
| x C | 125 | -1.853367 | 0.114863  | -0.722905 | x |
| x C | 126 | -1.486310 | -0.584086 | -0.827081 | x |
| x C | 127 | -1.514327 | -0.492325 | -0.829071 | x |
| x C | 128 | -1.588716 | -0.405338 | -0.805282 | x |
| x C | 129 | -1.630154 | -0.414638 | -0.779099 | x |
| x C | 130 | -1.597604 | -0.509133 | -0.778265 | x |

|     |     |           |           |           |   |
|-----|-----|-----------|-----------|-----------|---|
| x C | 131 | -1.622299 | -0.208350 | -0.839138 | x |
| x C | 132 | -1.716727 | -0.137927 | -0.786130 | x |
| x C | 133 | -1.623848 | -0.305464 | -0.808563 | x |
| x C | 134 | -1.939171 | 0.259170  | -0.577087 | x |
| x C | 135 | -1.874588 | 0.235320  | -0.540994 | x |
| x C | 136 | -1.777609 | 0.138083  | -0.539562 | x |
| x C | 137 | -1.750529 | 0.067371  | -0.574184 | x |
| x C | 138 | -1.818892 | 0.096835  | -0.609249 | x |
| x C | 139 | -1.611314 | 0.295245  | -0.349848 | x |
| x C | 140 | -1.593679 | 0.217264  | -0.378380 | x |
| x C | 141 | -1.668834 | 0.241187  | -0.410864 | x |
| x C | 142 | -1.758462 | 0.342516  | -0.413904 | x |
| x C | 143 | -1.770081 | 0.416503  | -0.384298 | x |
| x C | 144 | -1.341906 | -0.286818 | -0.491033 | x |
| x C | 145 | -1.436000 | -0.189499 | -0.493738 | x |
| x C | 146 | -1.459548 | -0.113606 | -0.461660 | x |
| x C | 147 | -1.388470 | -0.139329 | -0.427293 | x |
| x C | 148 | -1.296658 | -0.239071 | -0.426387 | x |
| x C | 149 | -1.704177 | 0.111120  | -0.502520 | x |
| x C | 150 | -1.653188 | 0.160249  | -0.441856 | x |
| x C | 151 | -1.555469 | -0.007149 | -0.465545 | x |
| x C | 152 | -1.587964 | 0.520045  | -0.327260 | x |
| x C | 153 | -1.496065 | 0.491757  | -0.329126 | x |
| x C | 154 | -1.409830 | 0.417930  | -0.304945 | x |
| x C | 155 | -1.419689 | 0.377820  | -0.278385 | x |
| x C | 156 | -1.513938 | 0.409683  | -0.278085 | x |
| x C | 157 | -1.248803 | 0.508323  | -0.421829 | x |
| x C | 158 | -1.267580 | 0.473999  | -0.396729 | x |
| x C | 159 | -1.193437 | 0.418726  | -0.364775 | x |
| x C | 160 | -1.104191 | 0.401229  | -0.359214 | x |
| x C | 161 | -1.091964 | 0.440180  | -0.384902 | x |
| x C | 162 | -0.968778 | 0.074492  | -0.215589 | x |
| x C | 163 | -1.052485 | 0.142942  | -0.241469 | x |
| x C | 164 | -1.052015 | 0.204943  | -0.258800 | x |
| x C | 165 | -0.967785 | 0.196870  | -0.249217 | x |
| x C | 166 | -0.887724 | 0.128440  | -0.222328 | x |
| x C | 167 | -1.309091 | 0.380651  | -0.307958 | x |
| x C | 168 | -1.207730 | 0.380397  | -0.336178 | x |
| x C | 169 | -1.140651 | 0.280712  | -0.285655 | x |
| x C | 170 | -1.273306 | -0.209777 | -0.754173 | x |
| x C | 171 | -1.184357 | -0.318404 | -0.770533 | x |
| x C | 172 | -1.158284 | -0.390171 | -0.742336 | x |
| x C | 173 | -1.128066 | -0.366087 | -0.698294 | x |
| x C | 174 | -1.212594 | -0.256299 | -0.681389 | x |
| x C | 175 | -1.247184 | -0.182295 | -0.710310 | x |
| x C | 176 | -1.391966 | -0.072997 | -0.798693 | x |

|     |     |           |           |           |   |
|-----|-----|-----------|-----------|-----------|---|
| x C | 177 | -1.401610 | -0.003203 | -0.820164 | x |
| x C | 178 | -1.105807 | -0.446978 | -0.832699 | x |
| x C | 179 | -1.202475 | -0.344078 | -0.816547 | x |
| x C | 180 | -1.293173 | -0.337781 | -0.828138 | x |
| x C | 181 | -1.176983 | -0.230643 | -0.639219 | x |
| x C | 182 | -1.273866 | 0.724127  | -0.307257 | x |
| x C | 183 | -1.383582 | 0.776320  | -0.304185 | x |
| x C | 184 | -1.429098 | 0.866211  | -0.270746 | x |
| x C | 185 | -1.362500 | 0.833486  | -0.229711 | x |
| x C | 186 | -1.254349 | 0.785594  | -0.233363 | x |
| x C | 187 | -1.208819 | 0.694589  | -0.266072 | x |
| x C | 188 | -1.037871 | 0.556927  | -0.285507 | x |
| x C | 189 | -0.943998 | 0.532630  | -0.291493 | x |
| x C | 190 | -1.216740 | 0.856616  | -0.165647 | x |
| x C | 191 | -1.185550 | 0.759860  | -0.192130 | x |
| x C | 192 | -1.181564 | 0.695591  | -0.168347 | x |
| x C | 193 | -1.446962 | 0.808738  | -0.345728 | x |
| x C | 194 | -0.865214 | -0.306113 | -0.710648 | x |
| x N | 1   | 0.929342  | 0.805702  | 1.111615  | x |
| x N | 2   | 0.287968  | 1.309444  | 0.964469  | x |
| x N | 3   | 0.700962  | 0.606347  | 0.854664  | x |
| x N | 4   | 0.638926  | 0.982031  | 1.000459  | x |
| x N | 5   | 0.573538  | 0.931810  | 0.941718  | x |
| x N | 6   | 0.733174  | 0.805844  | 0.977922  | x |
| x N | 7   | 0.173944  | 1.509984  | 0.923385  | x |
| x N | 8   | -0.123465 | 1.919335  | 0.706027  | x |
| x N | 9   | 0.592474  | 1.527742  | 0.802237  | x |
| x N | 10  | 0.125032  | 1.685388  | 0.813841  | x |
| x N | 11  | 0.227021  | 1.686213  | 0.781459  | x |
| x N | 12  | 0.299773  | 1.591500  | 0.838580  | x |
| x N | 13  | -0.191696 | 1.911556  | 0.610907  | x |
| x N | 14  | -0.393357 | 1.698052  | 0.352751  | x |
| x N | 15  | 0.311561  | 1.273125  | 0.457794  | x |
| x N | 16  | -0.187966 | 1.723199  | 0.474686  | x |
| x N | 17  | -0.063628 | 1.568426  | 0.435761  | x |
| x N | 18  | -0.012050 | 1.621456  | 0.499166  | x |
| x N | 19  | -0.478676 | 1.596425  | 0.302463  | x |
| x N | 20  | -0.492026 | 1.162595  | 0.416144  | x |
| x N | 21  | -0.067929 | 0.887886  | 0.205848  | x |
| x N | 22  | -0.415011 | 1.301148  | 0.336275  | x |
| x N | 23  | -0.312459 | 1.124876  | 0.311876  | x |
| x N | 24  | -0.313714 | 1.231350  | 0.281951  | x |
| x N | 25  | -0.805702 | -0.929342 | -1.111615 | x |
| x N | 26  | -1.309444 | -0.287968 | -0.964469 | x |
| x N | 27  | -0.606347 | -0.700962 | -0.854664 | x |
| x N | 28  | -0.982031 | -0.638926 | -1.000459 | x |



|      |    |           |           |           |   |
|------|----|-----------|-----------|-----------|---|
| x N  | 29 | -0.931810 | -0.573538 | -0.941718 | x |
| x N  | 30 | -0.805844 | -0.733174 | -0.977922 | x |
| x N  | 31 | -1.509984 | -0.173944 | -0.923385 | x |
| x N  | 32 | -1.919335 | 0.123465  | -0.706027 | x |
| x N  | 33 | -1.527742 | -0.592474 | -0.802237 | x |
| x N  | 34 | -1.685388 | -0.125032 | -0.813841 | x |
| x N  | 35 | -1.686213 | -0.227021 | -0.781459 | x |
| x N  | 36 | -1.591500 | -0.299773 | -0.838580 | x |
| x N  | 37 | -1.911556 | 0.191696  | -0.610907 | x |
| x N  | 38 | -1.698052 | 0.393357  | -0.352751 | x |
| x N  | 39 | -1.273125 | -0.311561 | -0.457794 | x |
| x N  | 40 | -1.723199 | 0.187966  | -0.474686 | x |
| x N  | 41 | -1.568426 | 0.063628  | -0.435761 | x |
| x N  | 42 | -1.621456 | 0.012050  | -0.499166 | x |
| x N  | 43 | -1.596425 | 0.478676  | -0.302463 | x |
| x N  | 44 | -1.162595 | 0.492026  | -0.416144 | x |
| x N  | 45 | -0.887886 | 0.067929  | -0.205848 | x |
| x N  | 46 | -1.301148 | 0.415011  | -0.336275 | x |
| x N  | 47 | -1.124876 | 0.312459  | -0.311876 | x |
| x N  | 48 | -1.231350 | 0.313714  | -0.281951 | x |
| x O  | 1  | 0.137690  | 1.297495  | 0.778718  | x |
| x O  | 2  | 0.071348  | 1.461000  | 0.799345  | x |
| x O  | 3  | -0.656109 | 1.109230  | 0.271269  | x |
| x O  | 4  | -0.495343 | 1.049012  | 0.292104  | x |
| x O  | 5  | -1.297495 | -0.137690 | -0.778718 | x |
| x O  | 6  | -1.461000 | -0.071348 | -0.799345 | x |
| x O  | 7  | -1.109230 | 0.656109  | -0.271269 | x |
| x O  | 8  | -1.049012 | 0.495343  | -0.292104 | x |
| x Cl | 1  | 1.140633  | 0.776825  | 1.158674  | x |
| x Cl | 2  | 1.073410  | 0.630958  | 1.184745  | x |
| x Cl | 3  | 0.161845  | 1.530751  | 1.026258  | x |
| x Cl | 4  | 0.026766  | 1.464601  | 0.934651  | x |
| x Cl | 5  | 0.851814  | 0.349196  | 0.834382  | x |
| x Cl | 6  | 0.724540  | 0.544256  | 0.752738  | x |
| x Cl | 7  | -0.277571 | 2.149368  | 0.666573  | x |
| x Cl | 8  | -0.362910 | 2.001859  | 0.671706  | x |
| x Cl | 9  | -0.448269 | 1.707980  | 0.250903  | x |
| x Cl | 10 | -0.652022 | 1.856624  | 0.333491  | x |
| x Cl | 11 | -0.537579 | 1.014624  | 0.420155  | x |
| x Cl | 12 | -0.465385 | 1.130884  | 0.518561  | x |
| x Cl | 13 | 0.223732  | 0.841099  | 0.702845  | x |
| x Cl | 14 | 0.428528  | 0.754396  | 0.696564  | x |
| x Cl | 15 | 0.253320  | 0.968149  | 0.684594  | x |
| x Cl | 16 | -0.776825 | -1.140633 | -1.158674 | x |
| x Cl | 17 | -0.630958 | -1.073410 | -1.184745 | x |
| x Cl | 18 | -1.530751 | -0.161845 | -1.026258 | x |

|      |    |           |           |           |   |
|------|----|-----------|-----------|-----------|---|
| x Cl | 19 | -1.464601 | -0.026766 | -0.934651 | x |
| x Cl | 20 | -0.349196 | -0.851814 | -0.834382 | x |
| x Cl | 21 | -0.544256 | -0.724540 | -0.752738 | x |
| x Cl | 22 | -2.149368 | 0.277571  | -0.666573 | x |
| x Cl | 23 | -2.001859 | 0.362910  | -0.671706 | x |
| x Cl | 24 | -1.707980 | 0.448269  | -0.250903 | x |
| x Cl | 25 | -1.856624 | 0.652022  | -0.333491 | x |
| x Cl | 26 | -1.014624 | 0.537579  | -0.420155 | x |
| x Cl | 27 | -1.130884 | 0.465385  | -0.518561 | x |
| x Cl | 28 | -0.841099 | -0.223732 | -0.702845 | x |
| x Cl | 29 | -0.754396 | -0.428528 | -0.696564 | x |
| x Cl | 30 | -0.968149 | -0.253320 | -0.684594 | x |
| x Zn | 1  | 1.030157  | 0.767052  | 1.165520  | x |
| x Zn | 2  | 0.152953  | 1.459055  | 0.964586  | x |
| x Zn | 3  | 0.727702  | 0.495694  | 0.807623  | x |
| x Zn | 4  | -0.247908 | 2.009261  | 0.664415  | x |
| x Zn | 5  | -0.506796 | 1.728633  | 0.307315  | x |
| x Zn | 6  | -0.541802 | 1.135845  | 0.456421  | x |
| x Zn | 7  | -0.767052 | -1.030157 | -1.165520 | x |
| x Zn | 8  | -1.459055 | -0.152953 | -0.964586 | x |
| x Zn | 9  | -0.495694 | -0.727702 | -0.807623 | x |
| x Zn | 10 | -2.009261 | 0.247908  | -0.664415 | x |
| x Zn | 11 | -1.728633 | 0.506796  | -0.307315 | x |
| x Zn | 12 | -1.135845 | 0.541802  | -0.456421 | x |

**Table S10.** Fractional atomic coordinates of the optimised structure of chloroform@1a

| x | Element | Atom   | Fractional coordinates of atoms |           |           | x |
|---|---------|--------|---------------------------------|-----------|-----------|---|
| x |         | Number | u                               | v         | w         | x |
| x | -----   |        |                                 |           |           | x |
| x | H       | 1      | 0.864956                        | 0.969811  | 0.863412  | x |
| x | H       | 2      | 0.734988                        | 1.021034  | 0.802854  | x |
| x | H       | 3      | 0.884925                        | 0.713593  | 0.774956  | x |
| x | H       | 4      | 1.004124                        | 0.675543  | 0.840192  | x |
| x | H       | 5      | 0.235798                        | 1.286025  | 0.681620  | x |
| x | H       | 6      | 0.389650                        | 1.106240  | 0.671161  | x |
| x | H       | 7      | 0.549119                        | 1.168787  | 0.757279  | x |
| x | H       | 8      | 0.388311                        | 1.346498  | 0.764951  | x |
| x | H       | 9      | 0.807840                        | 0.529922  | 0.656982  | x |
| x | H       | 10     | 0.785780                        | 0.663505  | 0.707347  | x |
| x | H       | 11     | 0.561392                        | 0.870948  | 0.612172  | x |
| x | H       | 12     | 0.595737                        | 0.729217  | 0.564824  | x |
| x | H       | 13     | 0.561955                        | 0.589928  | 0.490652  | x |
| x | H       | 14     | 0.392888                        | 0.649044  | 0.487826  | x |
| x | H       | 15     | 0.450463                        | 0.597453  | 0.624518  | x |
| x | H       | 16     | 0.616097                        | 0.541311  | 0.622260  | x |
| x | H       | 17     | -0.162436                       | 0.916330  | 0.464783  | x |
| x | H       | 18     | -0.019167                       | 0.789219  | 0.515140  | x |
| x | H       | 19     | 0.141643                        | 0.852178  | 0.478550  | x |
| x | H       | 20     | -0.008019                       | 0.976983  | 0.429323  | x |
| x | H       | 21     | 0.327099                        | 0.481509  | 0.713502  | x |
| x | H       | 22     | 0.351340                        | 0.542444  | 0.657115  | x |
| x | H       | 23     | 0.067561                        | 0.663884  | 0.594752  | x |
| x | H       | 24     | 0.056459                        | 0.593340  | 0.651660  | x |
| x | H       | 25     | 0.144457                        | 1.386453  | 0.471925  | x |
| x | H       | 26     | 0.111820                        | 1.358026  | 0.637796  | x |
| x | H       | 27     | 0.612131                        | 0.639191  | 0.430152  | x |
| x | H       | 28     | -0.969811                       | -0.864956 | -0.363412 | x |
| x | H       | 29     | -1.021034                       | -0.734988 | -0.302854 | x |
| x | H       | 30     | -0.713593                       | -0.884925 | -0.274956 | x |
| x | H       | 31     | -0.675543                       | -1.004124 | -0.340192 | x |
| x | H       | 32     | -1.286025                       | -0.235798 | -0.181620 | x |
| x | H       | 33     | -1.106240                       | -0.389650 | -0.171161 | x |
| x | H       | 34     | -1.168787                       | -0.549119 | -0.257279 | x |
| x | H       | 35     | -1.346498                       | -0.388311 | -0.264951 | x |
| x | H       | 36     | -0.529922                       | -0.807840 | -0.156982 | x |
| x | H       | 37     | -0.663505                       | -0.785780 | -0.207347 | x |
| x | H       | 38     | -0.870948                       | -0.561392 | -0.112172 | x |
| x | H       | 39     | -0.729217                       | -0.595737 | -0.064824 | x |
| x | H       | 40     | -0.589928                       | -0.561955 | 0.009348  | x |
| x | H       | 41     | -0.649044                       | -0.392888 | 0.012174  | x |

|     |    |           |           |           |   |
|-----|----|-----------|-----------|-----------|---|
| x H | 42 | -0.597453 | -0.450463 | -0.124518 | x |
| x H | 43 | -0.541311 | -0.616097 | -0.122260 | x |
| x H | 44 | -0.916330 | 0.162436  | 0.035217  | x |
| x H | 45 | -0.789219 | 0.019167  | -0.015140 | x |
| x H | 46 | -0.852178 | -0.141643 | 0.021450  | x |
| x H | 47 | -0.976983 | 0.008019  | 0.070677  | x |
| x H | 48 | -0.481509 | -0.327099 | -0.213502 | x |
| x H | 49 | -0.542444 | -0.351340 | -0.157115 | x |
| x H | 50 | -0.663884 | -0.067561 | -0.094752 | x |
| x H | 51 | -0.593340 | -0.056459 | -0.151660 | x |
| x H | 52 | -1.386453 | -0.144457 | 0.028075  | x |
| x H | 53 | -1.358026 | -0.111820 | -0.137796 | x |
| x H | 54 | -0.639191 | -0.612131 | 0.069848  | x |
| x H | 55 | -0.864956 | -0.969811 | -0.863412 | x |
| x H | 56 | -0.734988 | -1.021034 | -0.802854 | x |
| x H | 57 | -0.884925 | -0.713593 | -0.774956 | x |
| x H | 58 | -1.004124 | -0.675543 | -0.840192 | x |
| x H | 59 | -0.235798 | -1.286025 | -0.681620 | x |
| x H | 60 | -0.389650 | -1.106240 | -0.671161 | x |
| x H | 61 | -0.549119 | -1.168787 | -0.757279 | x |
| x H | 62 | -0.388311 | -1.346498 | -0.764951 | x |
| x H | 63 | -0.807840 | -0.529922 | -0.656982 | x |
| x H | 64 | -0.785780 | -0.663505 | -0.707347 | x |
| x H | 65 | -0.561392 | -0.870948 | -0.612172 | x |
| x H | 66 | -0.595737 | -0.729217 | -0.564824 | x |
| x H | 67 | -0.561955 | -0.589928 | -0.490652 | x |
| x H | 68 | -0.392888 | -0.649044 | -0.487826 | x |
| x H | 69 | -0.450463 | -0.597453 | -0.624518 | x |
| x H | 70 | -0.616097 | -0.541311 | -0.622260 | x |
| x H | 71 | 0.162436  | -0.916330 | -0.464783 | x |
| x H | 72 | 0.019167  | -0.789219 | -0.515140 | x |
| x H | 73 | -0.141643 | -0.852178 | -0.478550 | x |
| x H | 74 | 0.008019  | -0.976983 | -0.429323 | x |
| x H | 75 | -0.327099 | -0.481509 | -0.713502 | x |
| x H | 76 | -0.351340 | -0.542444 | -0.657115 | x |
| x H | 77 | -0.067561 | -0.663884 | -0.594752 | x |
| x H | 78 | -0.056459 | -0.593340 | -0.651660 | x |
| x H | 79 | -0.144457 | -1.386453 | -0.471925 | x |
| x H | 80 | -0.111820 | -1.358026 | -0.637796 | x |
| x H | 81 | -0.612131 | -0.639191 | -0.430152 | x |
| x H | 82 | 0.969811  | 0.864956  | 1.363412  | x |
| x H | 83 | 1.021034  | 0.734988  | 1.302854  | x |
| x H | 84 | 0.713593  | 0.884925  | 1.274956  | x |
| x H | 85 | 0.675543  | 1.004124  | 1.340192  | x |
| x H | 86 | 1.286025  | 0.235798  | 1.181620  | x |
| x H | 87 | 1.106240  | 0.389650  | 1.171161  | x |

|     |     |          |           |          |   |
|-----|-----|----------|-----------|----------|---|
| x H | 88  | 1.168787 | 0.549119  | 1.257279 | x |
| x H | 89  | 1.346498 | 0.388311  | 1.264951 | x |
| x H | 90  | 0.529922 | 0.807840  | 1.156982 | x |
| x H | 91  | 0.663505 | 0.785780  | 1.207347 | x |
| x H | 92  | 0.870948 | 0.561392  | 1.112172 | x |
| x H | 93  | 0.729217 | 0.595737  | 1.064824 | x |
| x H | 94  | 0.589928 | 0.561955  | 0.990652 | x |
| x H | 95  | 0.649044 | 0.392888  | 0.987826 | x |
| x H | 96  | 0.597453 | 0.450463  | 1.124518 | x |
| x H | 97  | 0.541311 | 0.616097  | 1.122260 | x |
| x H | 98  | 0.916330 | -0.162436 | 0.964783 | x |
| x H | 99  | 0.789219 | -0.019167 | 1.015140 | x |
| x H | 100 | 0.852178 | 0.141643  | 0.978550 | x |
| x H | 101 | 0.976983 | -0.008019 | 0.929323 | x |
| x H | 102 | 0.481509 | 0.327099  | 1.213502 | x |
| x H | 103 | 0.542444 | 0.351340  | 1.157115 | x |
| x H | 104 | 0.663884 | 0.067561  | 1.094752 | x |
| x H | 105 | 0.593340 | 0.056459  | 1.151660 | x |
| x H | 106 | 1.386453 | 0.144457  | 0.971925 | x |
| x H | 107 | 1.358026 | 0.111820  | 1.137796 | x |
| x H | 108 | 0.639191 | 0.612131  | 0.930152 | x |
| x C | 1   | 0.865895 | 0.915598  | 0.843367 | x |
| x C | 2   | 0.794986 | 0.943425  | 0.809099 | x |
| x C | 3   | 0.800942 | 0.870586  | 0.783459 | x |
| x C | 4   | 0.877421 | 0.772311  | 0.794354 | x |
| x C | 5   | 0.943972 | 0.750556  | 0.830025 | x |
| x C | 6   | 0.724654 | 0.898227  | 0.747462 | x |
| x C | 7   | 0.660378 | 0.856111  | 0.691711 | x |
| x C | 8   | 0.574776 | 1.017941  | 0.712404 | x |
| x C | 9   | 0.307086 | 1.256956  | 0.697361 | x |
| x C | 10  | 0.392590 | 1.157435  | 0.691612 | x |
| x C | 11  | 0.481794 | 1.123948  | 0.713319 | x |
| x C | 12  | 0.481024 | 1.192826  | 0.739663 | x |
| x C | 13  | 0.393098 | 1.290741  | 0.743774 | x |
| x C | 14  | 0.754182 | 0.606784  | 0.648838 | x |
| x C | 15  | 0.741339 | 0.680707  | 0.676370 | x |
| x C | 16  | 0.672224 | 0.777354  | 0.663314 | x |
| x C | 17  | 0.617207 | 0.796403  | 0.623054 | x |
| x C | 18  | 0.635028 | 0.718374  | 0.596904 | x |
| x C | 19  | 0.533941 | 0.592421  | 0.519267 | x |
| x C | 20  | 0.441409 | 0.624342  | 0.517837 | x |
| x C | 21  | 0.411654 | 0.624329  | 0.555922 | x |
| x C | 22  | 0.473817 | 0.595386  | 0.594357 | x |
| x C | 23  | 0.564325 | 0.565231  | 0.593358 | x |
| x C | 24  | 0.316335 | 0.653525  | 0.556720 | x |
| x C | 25  | 0.156888 | 0.740078  | 0.530643 | x |

|     |    |           |           |           |   |
|-----|----|-----------|-----------|-----------|---|
| x C | 26 | 0.221684  | 0.645640  | 0.587885  | x |
| x C | 27 | -0.093309 | 0.899175  | 0.468859  | x |
| x C | 28 | -0.014604 | 0.830116  | 0.496912  | x |
| x C | 29 | 0.071381  | 0.812592  | 0.501024  | x |
| x C | 30 | 0.075288  | 0.864964  | 0.476328  | x |
| x C | 31 | -0.006323 | 0.933209  | 0.449044  | x |
| x C | 32 | 0.272664  | 0.520236  | 0.685961  | x |
| x C | 33 | 0.285199  | 0.555090  | 0.655235  | x |
| x C | 34 | 0.211194  | 0.607219  | 0.621427  | x |
| x C | 35 | 0.126778  | 0.623060  | 0.620330  | x |
| x C | 36 | 0.120227  | 0.584281  | 0.651714  | x |
| x C | 37 | 0.133542  | 1.337831  | 0.455272  | x |
| x C | 38 | 0.120523  | 1.338309  | 0.602496  | x |
| x C | 39 | 0.541324  | 0.698002  | 0.412822  | x |
| x C | 40 | -0.915598 | -0.865895 | -0.343367 | x |
| x C | 41 | -0.943425 | -0.794986 | -0.309099 | x |
| x C | 42 | -0.870586 | -0.800942 | -0.283459 | x |
| x C | 43 | -0.772311 | -0.877421 | -0.294354 | x |
| x C | 44 | -0.750556 | -0.943972 | -0.330025 | x |
| x C | 45 | -0.898227 | -0.724654 | -0.247462 | x |
| x C | 46 | -0.856111 | -0.660378 | -0.191711 | x |
| x C | 47 | -1.017941 | -0.574776 | -0.212404 | x |
| x C | 48 | -1.256956 | -0.307086 | -0.197361 | x |
| x C | 49 | -1.157435 | -0.392590 | -0.191612 | x |
| x C | 50 | -1.123948 | -0.481794 | -0.213319 | x |
| x C | 51 | -1.192826 | -0.481024 | -0.239663 | x |
| x C | 52 | -1.290741 | -0.393098 | -0.243774 | x |
| x C | 53 | -0.606784 | -0.754182 | -0.148838 | x |
| x C | 54 | -0.680707 | -0.741339 | -0.176370 | x |
| x C | 55 | -0.777354 | -0.672224 | -0.163314 | x |
| x C | 56 | -0.796403 | -0.617207 | -0.123054 | x |
| x C | 57 | -0.718374 | -0.635028 | -0.096904 | x |
| x C | 58 | -0.592421 | -0.533941 | -0.019267 | x |
| x C | 59 | -0.624342 | -0.441409 | -0.017837 | x |
| x C | 60 | -0.624329 | -0.411654 | -0.055922 | x |
| x C | 61 | -0.595386 | -0.473817 | -0.094357 | x |
| x C | 62 | -0.565231 | -0.564325 | -0.093358 | x |
| x C | 63 | -0.653525 | -0.316335 | -0.056720 | x |
| x C | 64 | -0.740078 | -0.156888 | -0.030643 | x |
| x C | 65 | -0.645640 | -0.221684 | -0.087885 | x |
| x C | 66 | -0.899175 | 0.093309  | 0.031141  | x |
| x C | 67 | -0.830116 | 0.014604  | 0.003088  | x |
| x C | 68 | -0.812592 | -0.071381 | -0.001024 | x |
| x C | 69 | -0.864964 | -0.075288 | 0.023672  | x |
| x C | 70 | -0.933209 | 0.006323  | 0.050956  | x |
| x C | 71 | -0.520236 | -0.272664 | -0.185961 | x |

|     |     |           |           |           |   |
|-----|-----|-----------|-----------|-----------|---|
| x C | 72  | -0.555090 | -0.285199 | -0.155235 | x |
| x C | 73  | -0.607219 | -0.211194 | -0.121427 | x |
| x C | 74  | -0.623060 | -0.126778 | -0.120330 | x |
| x C | 75  | -0.584281 | -0.120227 | -0.151714 | x |
| x C | 76  | -1.337831 | -0.133542 | 0.044728  | x |
| x C | 77  | -1.338309 | -0.120523 | -0.102496 | x |
| x C | 78  | -0.698002 | -0.541324 | 0.087178  | x |
| x C | 79  | -0.865895 | -0.915598 | -0.843367 | x |
| x C | 80  | -0.794986 | -0.943425 | -0.809099 | x |
| x C | 81  | -0.800942 | -0.870586 | -0.783459 | x |
| x C | 82  | -0.877421 | -0.772311 | -0.794354 | x |
| x C | 83  | -0.943972 | -0.750556 | -0.830025 | x |
| x C | 84  | -0.724654 | -0.898227 | -0.747462 | x |
| x C | 85  | -0.660378 | -0.856111 | -0.691711 | x |
| x C | 86  | -0.574776 | -1.017941 | -0.712404 | x |
| x C | 87  | -0.307086 | -1.256956 | -0.697361 | x |
| x C | 88  | -0.392590 | -1.157435 | -0.691612 | x |
| x C | 89  | -0.481794 | -1.123948 | -0.713319 | x |
| x C | 90  | -0.481024 | -1.192826 | -0.739663 | x |
| x C | 91  | -0.393098 | -1.290741 | -0.743774 | x |
| x C | 92  | -0.754182 | -0.606784 | -0.648838 | x |
| x C | 93  | -0.741339 | -0.680707 | -0.676370 | x |
| x C | 94  | -0.672224 | -0.777354 | -0.663314 | x |
| x C | 95  | -0.617207 | -0.796403 | -0.623054 | x |
| x C | 96  | -0.635028 | -0.718374 | -0.596904 | x |
| x C | 97  | -0.533941 | -0.592421 | -0.519267 | x |
| x C | 98  | -0.441409 | -0.624342 | -0.517837 | x |
| x C | 99  | -0.411654 | -0.624329 | -0.555922 | x |
| x C | 100 | -0.473817 | -0.595386 | -0.594357 | x |
| x C | 101 | -0.564325 | -0.565231 | -0.593358 | x |
| x C | 102 | -0.316335 | -0.653525 | -0.556720 | x |
| x C | 103 | -0.156888 | -0.740078 | -0.530643 | x |
| x C | 104 | -0.221684 | -0.645640 | -0.587885 | x |
| x C | 105 | 0.093309  | -0.899175 | -0.468859 | x |
| x C | 106 | 0.014604  | -0.830116 | -0.496912 | x |
| x C | 107 | -0.071381 | -0.812592 | -0.501024 | x |
| x C | 108 | -0.075288 | -0.864964 | -0.476328 | x |
| x C | 109 | 0.006323  | -0.933209 | -0.449044 | x |
| x C | 110 | -0.272664 | -0.520236 | -0.685961 | x |
| x C | 111 | -0.285199 | -0.555090 | -0.655235 | x |
| x C | 112 | -0.211194 | -0.607219 | -0.621427 | x |
| x C | 113 | -0.126778 | -0.623060 | -0.620330 | x |
| x C | 114 | -0.120227 | -0.584281 | -0.651714 | x |
| x C | 115 | -0.133542 | -1.337831 | -0.455272 | x |
| x C | 116 | -0.120523 | -1.338309 | -0.602496 | x |
| x C | 117 | -0.541324 | -0.698002 | -0.412822 | x |

|     |     |          |           |          |   |
|-----|-----|----------|-----------|----------|---|
| x C | 118 | 0.915598 | 0.865895  | 1.343367 | x |
| x C | 119 | 0.943425 | 0.794986  | 1.309099 | x |
| x C | 120 | 0.870586 | 0.800942  | 1.283459 | x |
| x C | 121 | 0.772311 | 0.877421  | 1.294354 | x |
| x C | 122 | 0.750556 | 0.943972  | 1.330025 | x |
| x C | 123 | 0.898227 | 0.724654  | 1.247462 | x |
| x C | 124 | 0.856111 | 0.660378  | 1.191711 | x |
| x C | 125 | 1.017941 | 0.574776  | 1.212404 | x |
| x C | 126 | 1.256956 | 0.307086  | 1.197361 | x |
| x C | 127 | 1.157435 | 0.392590  | 1.191612 | x |
| x C | 128 | 1.123948 | 0.481794  | 1.213319 | x |
| x C | 129 | 1.192826 | 0.481024  | 1.239663 | x |
| x C | 130 | 1.290741 | 0.393098  | 1.243774 | x |
| x C | 131 | 0.606784 | 0.754182  | 1.148838 | x |
| x C | 132 | 0.680707 | 0.741339  | 1.176370 | x |
| x C | 133 | 0.777354 | 0.672224  | 1.163314 | x |
| x C | 134 | 0.796403 | 0.617207  | 1.123054 | x |
| x C | 135 | 0.718374 | 0.635028  | 1.096904 | x |
| x C | 136 | 0.592421 | 0.533941  | 1.019267 | x |
| x C | 137 | 0.624342 | 0.441409  | 1.017837 | x |
| x C | 138 | 0.624329 | 0.411654  | 1.055922 | x |
| x C | 139 | 0.595386 | 0.473817  | 1.094357 | x |
| x C | 140 | 0.565231 | 0.564325  | 1.093358 | x |
| x C | 141 | 0.653525 | 0.316335  | 1.056720 | x |
| x C | 142 | 0.740078 | 0.156888  | 1.030643 | x |
| x C | 143 | 0.645640 | 0.221684  | 1.087885 | x |
| x C | 144 | 0.899175 | -0.093309 | 0.968859 | x |
| x C | 145 | 0.830116 | -0.014604 | 0.996912 | x |
| x C | 146 | 0.812592 | 0.071381  | 1.001024 | x |
| x C | 147 | 0.864964 | 0.075288  | 0.976328 | x |
| x C | 148 | 0.933209 | -0.006323 | 0.949044 | x |
| x C | 149 | 0.520236 | 0.272664  | 1.185961 | x |
| x C | 150 | 0.555090 | 0.285199  | 1.155235 | x |
| x C | 151 | 0.607219 | 0.211194  | 1.121427 | x |
| x C | 152 | 0.623060 | 0.126778  | 1.120330 | x |
| x C | 153 | 0.584281 | 0.120227  | 1.151714 | x |
| x C | 154 | 1.337831 | 0.133542  | 0.955272 | x |
| x C | 155 | 1.338309 | 0.120523  | 1.102496 | x |
| x C | 156 | 0.698002 | 0.541324  | 0.912822 | x |
| x N | 1   | 0.938894 | 0.820941  | 0.853920 | x |
| x N | 2   | 0.648409 | 0.995127  | 0.741828 | x |
| x N | 3   | 0.578579 | 0.951629  | 0.684956 | x |
| x N | 4   | 0.732499 | 0.826094  | 0.723945 | x |
| x N | 5   | 0.306724 | 1.323219  | 0.722899 | x |
| x N | 6   | 0.702847 | 0.624941  | 0.609430 | x |
| x N | 7   | 0.594639 | 0.562630  | 0.556350 | x |



|      |    |           |           |           |   |
|------|----|-----------|-----------|-----------|---|
| x N  | 8  | 0.243132  | 0.713182  | 0.526636  | x |
| x N  | 9  | 0.142694  | 0.707210  | 0.560085  | x |
| x N  | 10 | 0.309637  | 0.617492  | 0.587922  | x |
| x N  | 11 | -0.089569 | 0.950351  | 0.445415  | x |
| x N  | 12 | 0.192034  | 0.533271  | 0.684160  | x |
| x N  | 13 | -0.820941 | -0.938894 | -0.353920 | x |
| x N  | 14 | -0.995127 | -0.648409 | -0.241828 | x |
| x N  | 15 | -0.951629 | -0.578579 | -0.184956 | x |
| x N  | 16 | -0.826094 | -0.732499 | -0.223945 | x |
| x N  | 17 | -1.323219 | -0.306724 | -0.222899 | x |
| x N  | 18 | -0.624941 | -0.702847 | -0.109430 | x |
| x N  | 19 | -0.562630 | -0.594639 | -0.056350 | x |
| x N  | 20 | -0.713182 | -0.243132 | -0.026636 | x |
| x N  | 21 | -0.707210 | -0.142694 | -0.060085 | x |
| x N  | 22 | -0.617492 | -0.309637 | -0.087922 | x |
| x N  | 23 | -0.950351 | 0.089569  | 0.054585  | x |
| x N  | 24 | -0.533271 | -0.192034 | -0.184160 | x |
| x N  | 25 | -0.938894 | -0.820941 | -0.853920 | x |
| x N  | 26 | -0.648409 | -0.995127 | -0.741828 | x |
| x N  | 27 | -0.578579 | -0.951629 | -0.684956 | x |
| x N  | 28 | -0.732499 | -0.826094 | -0.723945 | x |
| x N  | 29 | -0.306724 | -1.323219 | -0.722899 | x |
| x N  | 30 | -0.702847 | -0.624941 | -0.609430 | x |
| x N  | 31 | -0.594639 | -0.562630 | -0.556350 | x |
| x N  | 32 | -0.243132 | -0.713182 | -0.526636 | x |
| x N  | 33 | -0.142694 | -0.707210 | -0.560085 | x |
| x N  | 34 | -0.309637 | -0.617492 | -0.587922 | x |
| x N  | 35 | 0.089569  | -0.950351 | -0.445415 | x |
| x N  | 36 | -0.192034 | -0.533271 | -0.684160 | x |
| x N  | 37 | 0.820941  | 0.938894  | 1.353920  | x |
| x N  | 38 | 0.995127  | 0.648409  | 1.241828  | x |
| x N  | 39 | 0.951629  | 0.578579  | 1.184956  | x |
| x N  | 40 | 0.826094  | 0.732499  | 1.223945  | x |
| x N  | 41 | 1.323219  | 0.306724  | 1.222899  | x |
| x N  | 42 | 0.624941  | 0.702847  | 1.109430  | x |
| x N  | 43 | 0.562630  | 0.594639  | 1.056350  | x |
| x N  | 44 | 0.713182  | 0.243132  | 1.026636  | x |
| x N  | 45 | 0.707210  | 0.142694  | 1.060085  | x |
| x N  | 46 | 0.617492  | 0.309637  | 1.087922  | x |
| x N  | 47 | 0.950351  | -0.089569 | 0.945415  | x |
| x N  | 48 | 0.533271  | 0.192034  | 1.184160  | x |
| x Cl | 1  | 0.016893  | 1.388507  | 0.466935  | x |
| x Cl | 2  | 0.136746  | 1.334139  | 0.398040  | x |
| x Cl | 3  | 0.230843  | 1.219348  | 0.475359  | x |
| x Cl | 4  | 0.178739  | 1.372823  | 0.587173  | x |
| x Cl | 5  | 0.196145  | 1.207745  | 0.593629  | x |

|      |    |           |           |           |   |
|------|----|-----------|-----------|-----------|---|
| x Cl | 6  | 0.001236  | 1.403613  | 0.576830  | x |
| x Cl | 7  | 0.468949  | 0.801549  | 0.450385  | x |
| x Cl | 8  | 0.567456  | 0.724680  | 0.369251  | x |
| x Cl | 9  | 0.483662  | 0.652577  | 0.392843  | x |
| x Cl | 10 | -1.388507 | -0.016893 | 0.033065  | x |
| x Cl | 11 | -1.334139 | -0.136746 | 0.101960  | x |
| x Cl | 12 | -1.219348 | -0.230843 | 0.024641  | x |
| x Cl | 13 | -1.372823 | -0.178739 | -0.087173 | x |
| x Cl | 14 | -1.207745 | -0.196145 | -0.093629 | x |
| x Cl | 15 | -1.403613 | -0.001236 | -0.076830 | x |
| x Cl | 16 | -0.801549 | -0.468949 | 0.049615  | x |
| x Cl | 17 | -0.724680 | -0.567456 | 0.130749  | x |
| x Cl | 18 | -0.652577 | -0.483662 | 0.107157  | x |
| x Cl | 19 | -0.016893 | -1.388507 | -0.466935 | x |
| x Cl | 20 | -0.136746 | -1.334139 | -0.398040 | x |
| x Cl | 21 | -0.230843 | -1.219348 | -0.475359 | x |
| x Cl | 22 | -0.178739 | -1.372823 | -0.587173 | x |
| x Cl | 23 | -0.196145 | -1.207745 | -0.593629 | x |
| x Cl | 24 | -0.001236 | -1.403613 | -0.576830 | x |
| x Cl | 25 | -0.468949 | -0.801549 | -0.450385 | x |
| x Cl | 26 | -0.567456 | -0.724680 | -0.369251 | x |
| x Cl | 27 | -0.483662 | -0.652577 | -0.392843 | x |
| x Cl | 28 | 1.388507  | 0.016893  | 0.966935  | x |
| x Cl | 29 | 1.334139  | 0.136746  | 0.898040  | x |
| x Cl | 30 | 1.219348  | 0.230843  | 0.975359  | x |
| x Cl | 31 | 1.372823  | 0.178739  | 1.087173  | x |
| x Cl | 32 | 1.207745  | 0.196145  | 1.093629  | x |
| x Cl | 33 | 1.403613  | 0.001236  | 1.076830  | x |
| x Cl | 34 | 0.801549  | 0.468949  | 0.950385  | x |
| x Cl | 35 | 0.724680  | 0.567456  | 0.869251  | x |
| x Cl | 36 | 0.652577  | 0.483662  | 0.892843  | x |
| x Zn | 1  | 1.046912  | 0.790183  | 0.902438  | x |
| x Zn | 2  | 0.733338  | 0.512637  | 0.564874  | x |
| x Zn | 3  | 0.181248  | 0.474438  | 0.731352  | x |
| x Zn | 4  | -0.790183 | -1.046912 | -0.402438 | x |
| x Zn | 5  | -0.512637 | -0.733338 | -0.064874 | x |
| x Zn | 6  | -0.474438 | -0.181248 | -0.231352 | x |
| x Zn | 7  | -1.046912 | -0.790183 | -0.902438 | x |
| x Zn | 8  | -0.733338 | -0.512637 | -0.564874 | x |
| x Zn | 9  | -0.181248 | -0.474438 | -0.731352 | x |
| x Zn | 10 | 0.790183  | 1.046912  | 1.402438  | x |
| x Zn | 11 | 0.512637  | 0.733338  | 1.064874  | x |
| x Zn | 12 | 0.474438  | 0.181248  | 1.231352  | x |
| x I  | 1  | 1.127108  | 0.637378  | 0.940136  | x |
| x I  | 2  | 1.127096  | 0.826794  | 0.863766  | x |
| x I  | 3  | 0.850389  | 0.351116  | 0.601725  | x |

|     |    |           |           |           |   |
|-----|----|-----------|-----------|-----------|---|
| x I | 4  | 0.764657  | 0.541246  | 0.494904  | x |
| x I | 5  | 0.213839  | 0.531862  | 0.807123  | x |
| x I | 6  | 0.024691  | 0.505250  | 0.707889  | x |
| x I | 7  | -0.637378 | -1.127108 | -0.440136 | x |
| x I | 8  | -0.826794 | -1.127096 | -0.363766 | x |
| x I | 9  | -0.351116 | -0.850389 | -0.101725 | x |
| x I | 10 | -0.541246 | -0.764657 | 0.005096  | x |
| x I | 11 | -0.531862 | -0.213839 | -0.307123 | x |
| x I | 12 | -0.505250 | -0.024691 | -0.207889 | x |
| x I | 13 | -1.127108 | -0.637378 | -0.940136 | x |
| x I | 14 | -1.127096 | -0.826794 | -0.863766 | x |
| x I | 15 | -0.850389 | -0.351116 | -0.601725 | x |
| x I | 16 | -0.764657 | -0.541246 | -0.494904 | x |
| x I | 17 | -0.213839 | -0.531862 | -0.807123 | x |
| x I | 18 | -0.024691 | -0.505250 | -0.707889 | x |
| x I | 19 | 0.637378  | 1.127108  | 1.440136  | x |
| x I | 20 | 0.826794  | 1.127096  | 1.363766  | x |
| x I | 21 | 0.351116  | 0.850389  | 1.101725  | x |
| x I | 22 | 0.541246  | 0.764657  | 0.994904  | x |
| x I | 23 | 0.531862  | 0.213839  | 1.307123  | x |
| x I | 24 | 0.505250  | 0.024691  | 1.207889  | x |

## Additional Figures

**Figure S1.** Overlay of the experimental (blue) and computationally geometry optimised (red) structures of (+)-artemisinin@**1a**. Hydrogen atoms have been omitted.

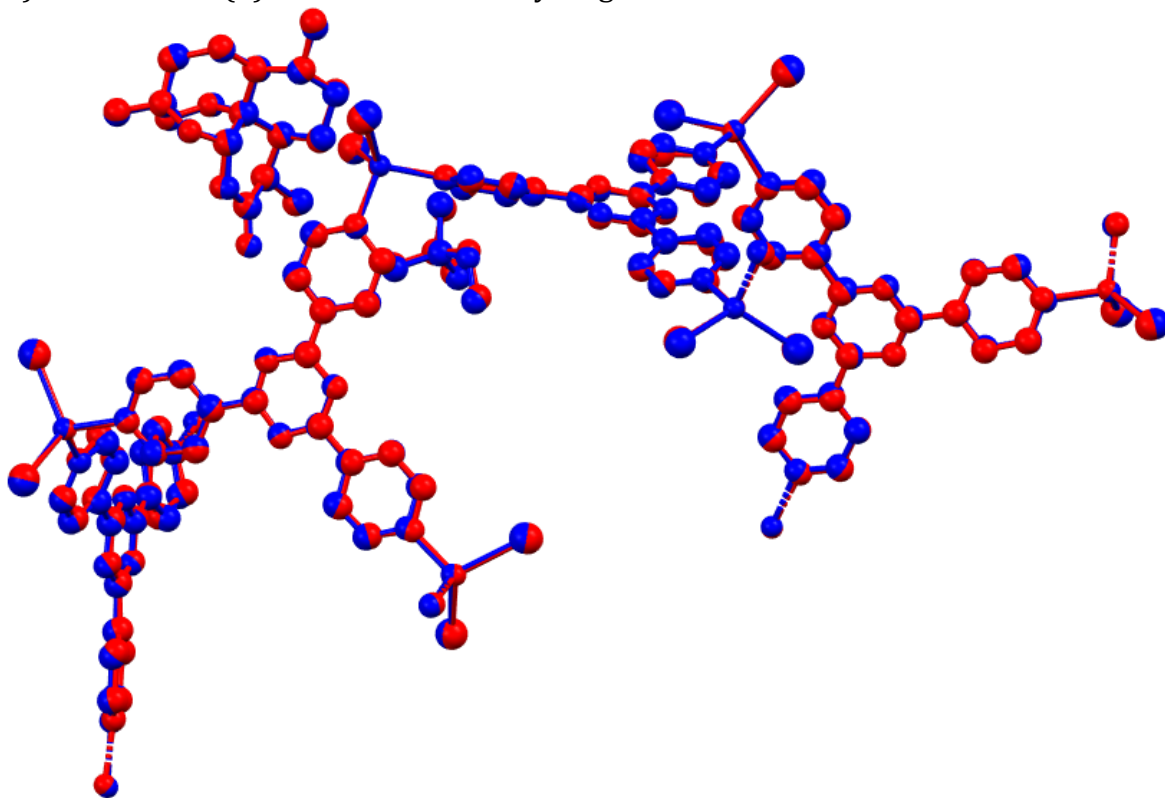

**Figure S2.** Overlay of the experimental (blue) and computationally geometry optimised (red) structures of 4-(trifluoromethyl)phenyl azide@**1a**. Hydrogen atoms have been omitted.

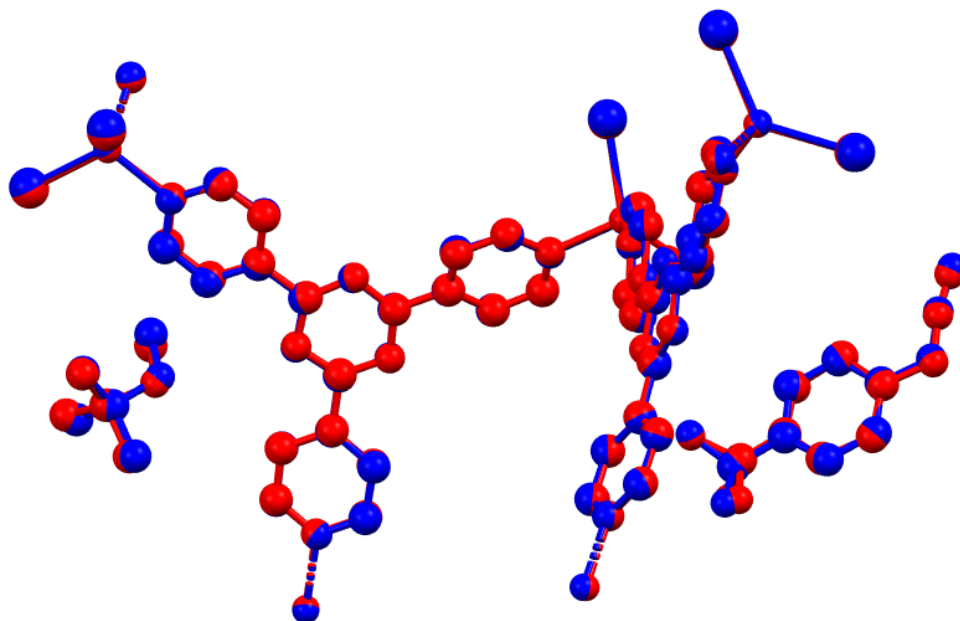

**Figure S3.** Overlay of the experimental (blue) and computationally geometry optimised (red) structures of vanillin@1a. Hydrogen atoms have been omitted.

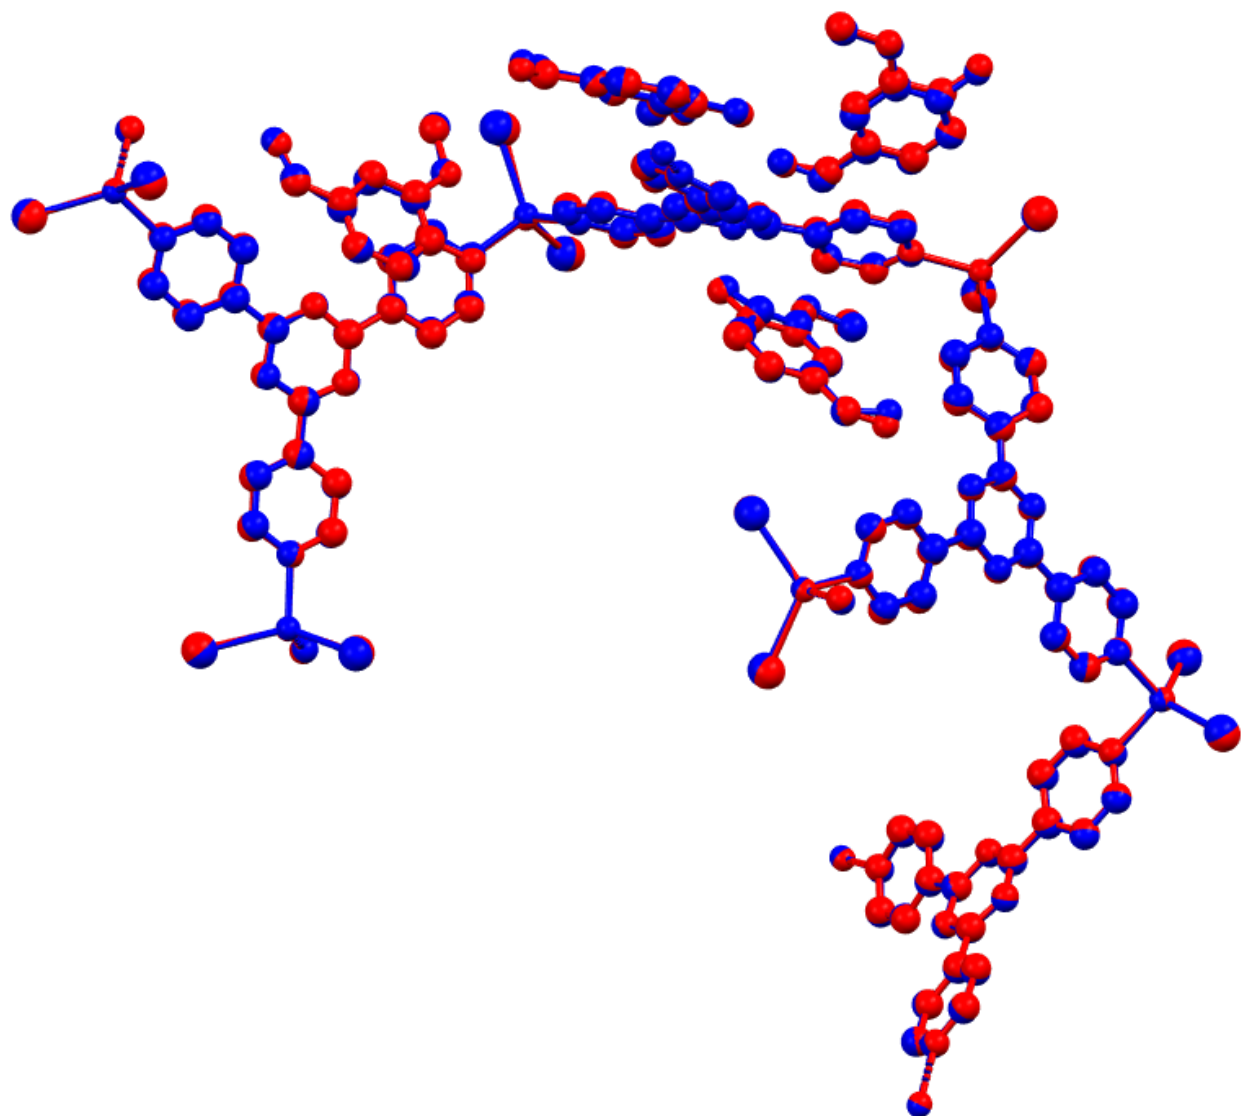

**Figure S4.** Overlay of the experimental (blue) and computationally geometry optimised (red) structures of (1*R*)-(-)-menthyl acetate@**1b**. Hydrogen atoms have been omitted.

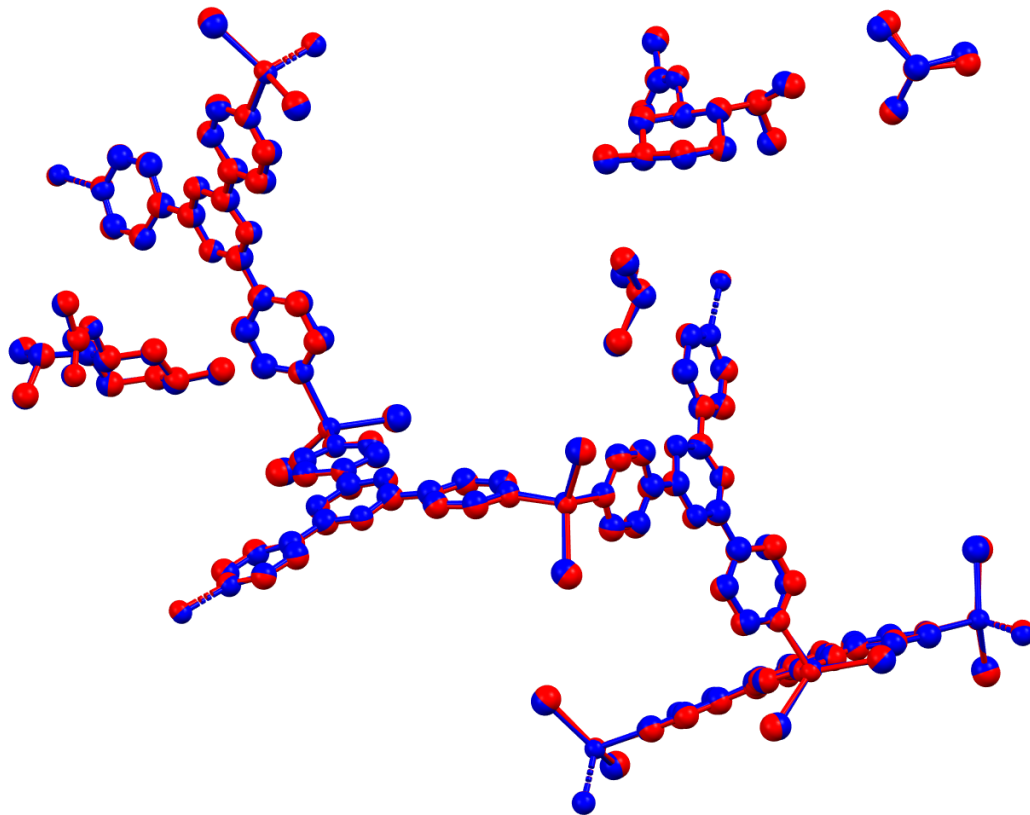

**Figure S5.** Overlay of the experimental (blue) and computationally geometry optimised (red) structures of (1*R*)-(-)-menthyl acetate@**1c**. Hydrogen atoms have been omitted.

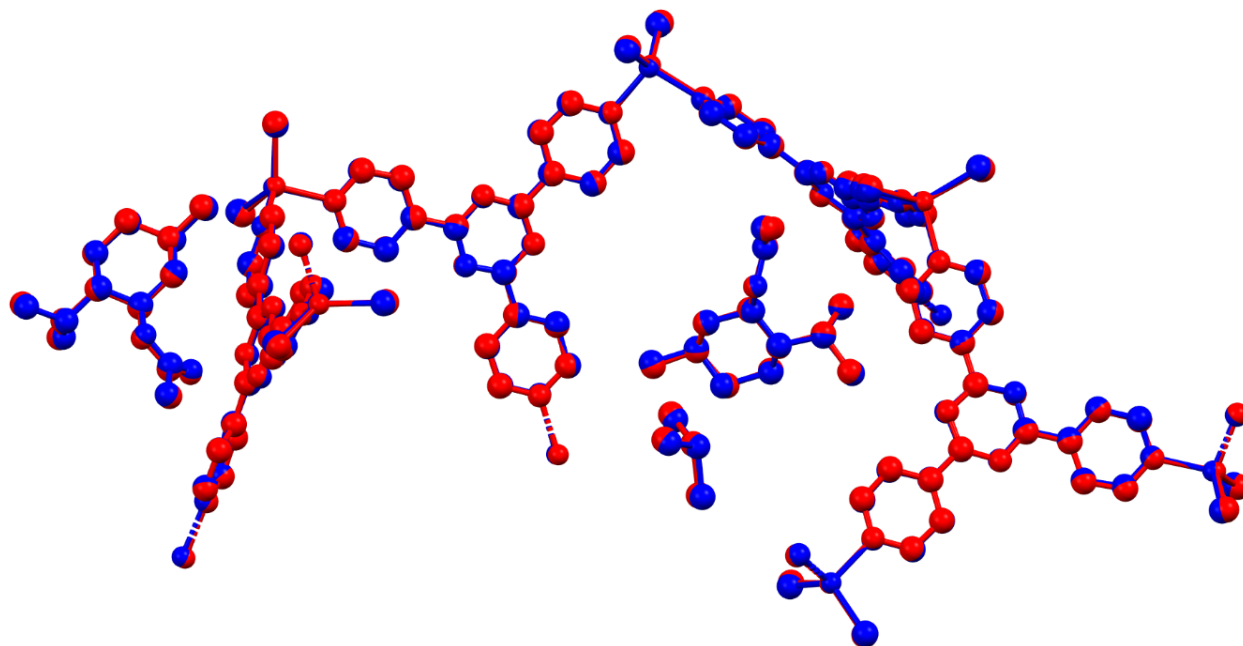

**Figure S6.** Overlay of the experimental (blue) and computationally geometry optimised (red) structures of chloroform@**1a**. Hydrogen atoms have been omitted.

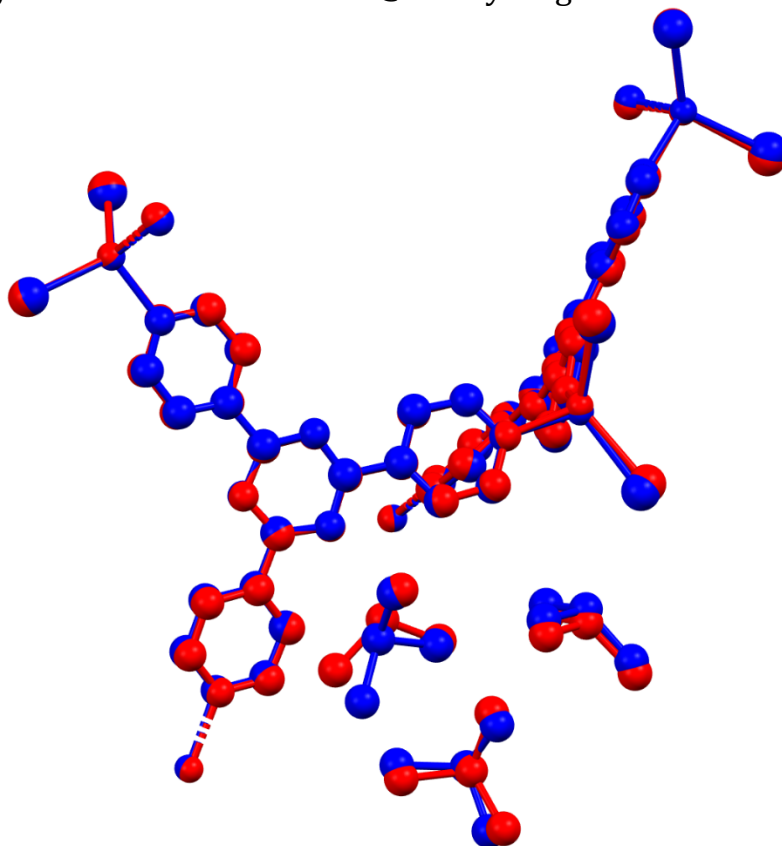





**Figure S8.** Experimental crystallographic packing models illustrating possible contacts (in Å) forged by (a) **E** in (+)-artemisinin@**1a** and (b) **G** in 4-(trifluoromethyl)phenyl azide@**1a**. Extraneous atoms are hidden for clarity. Guest ellipsoids are shown at 50% probability.

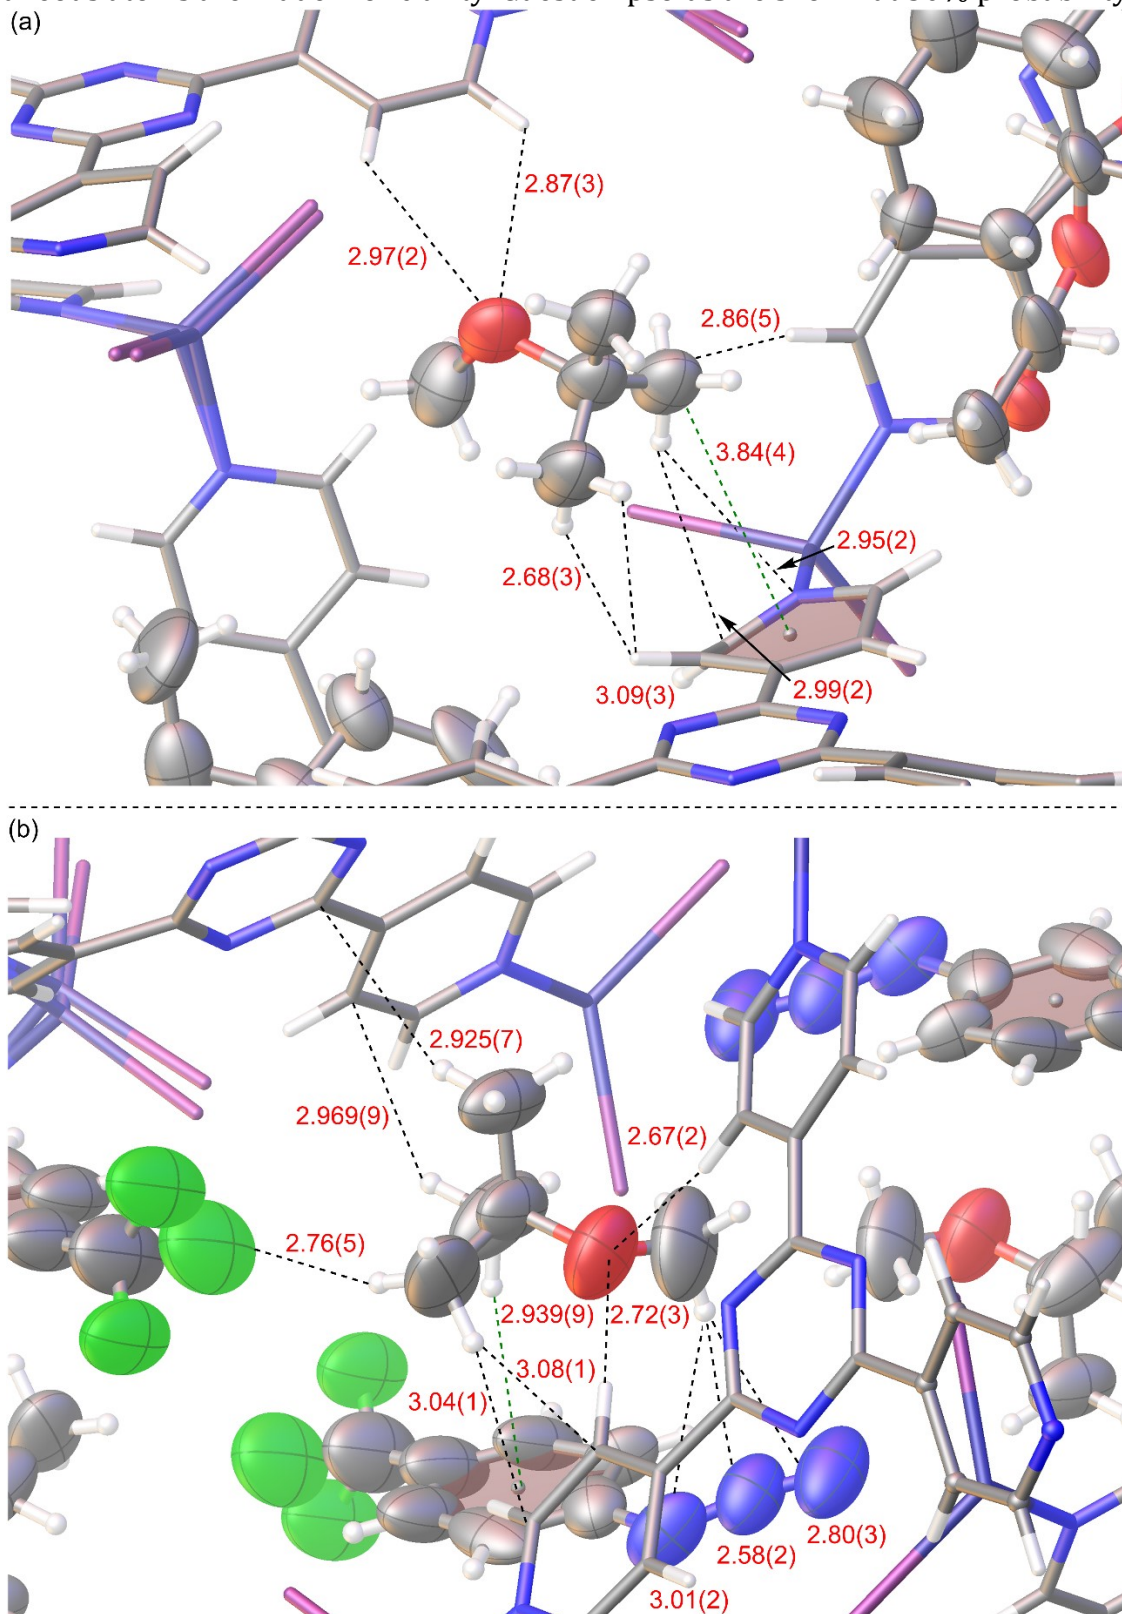

**Figure S9.** Experimental crystallographic packing model illustrating possible contacts (in Å) forged by **H** in vanillin@**1a**. Extraneous atoms are hidden for clarity. Guest ellipsoids are shown at 50% probability.

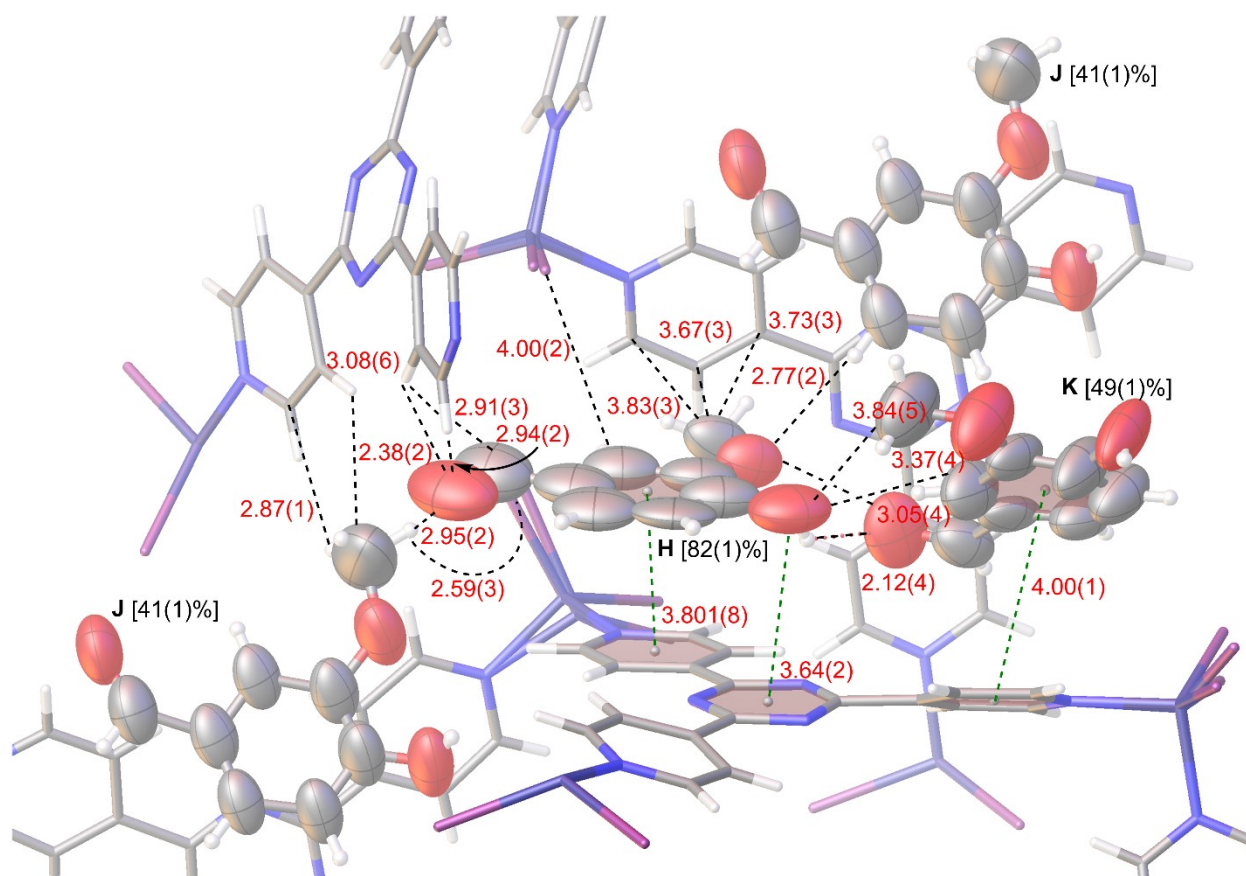

**Figure S10.** Experimental crystallographic packing model illustrating possible contacts (in Å) forged by **K** (centre) in vanillin@**1a**. Extraneous atoms are hidden for clarity. Guest ellipsoids are shown at 50% probability.

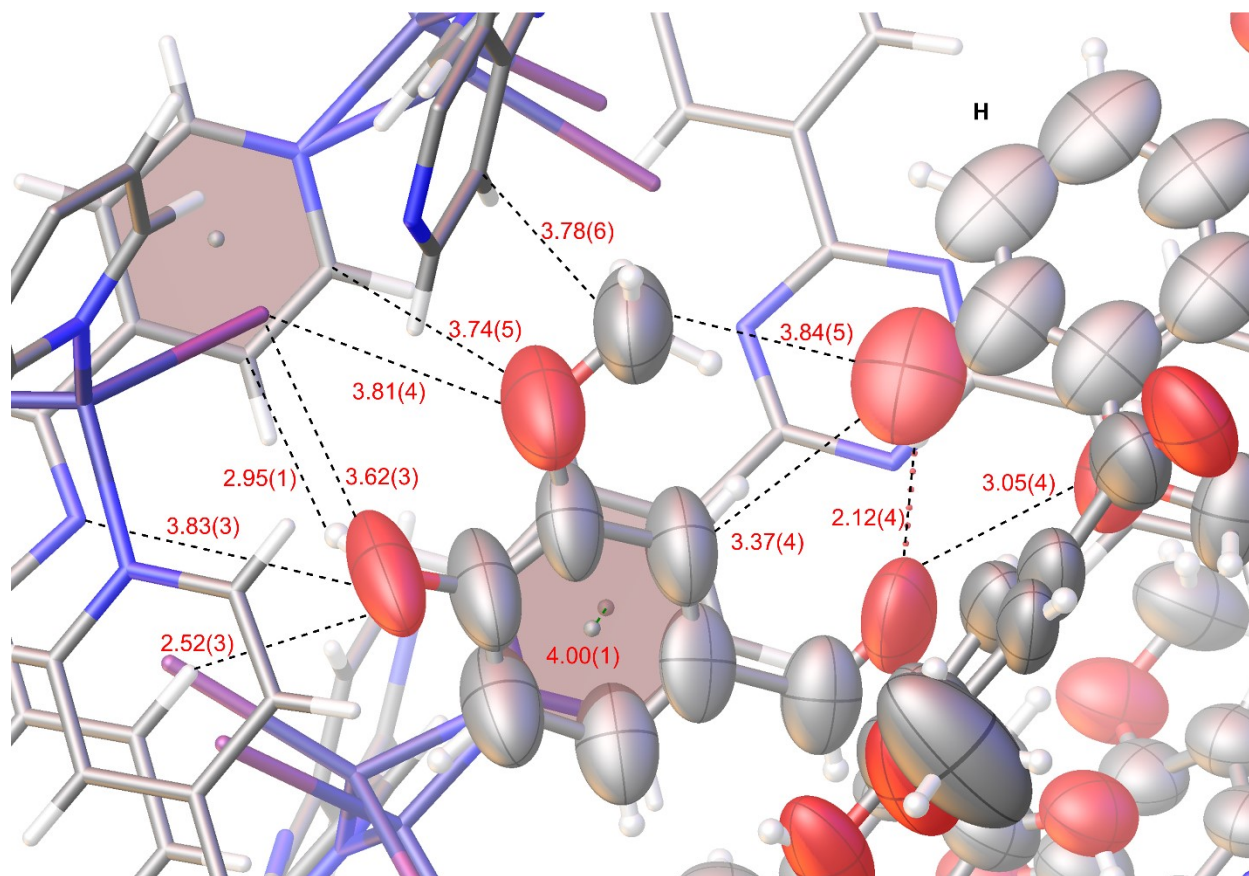

**Figure S11.** Experimental crystallographic packing models illustrating possible contacts (in Å) in (1*R*)-(-)-menthyl acetate@**1b** forged by (a) **N** and (b) **O**. Extraneous atoms are hidden for clarity. Guest ellipsoids are shown at 50% probability.

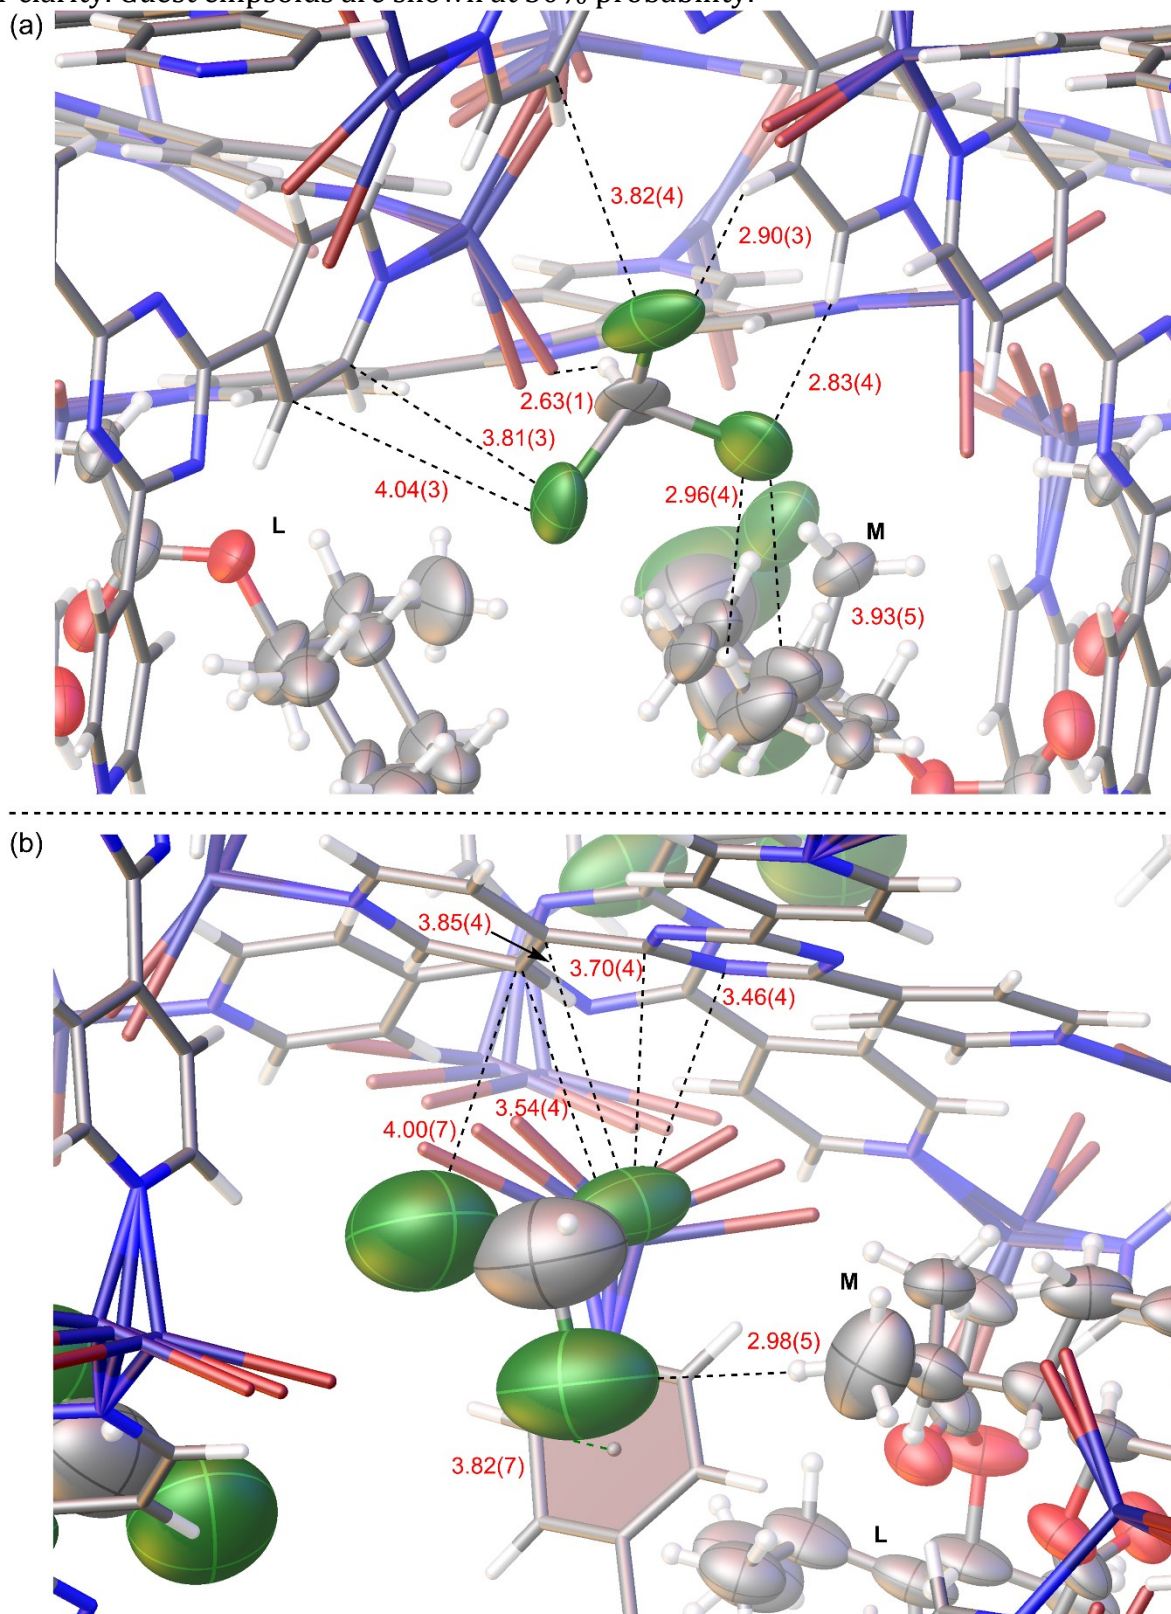

**Figure S12.** Experimental crystallographic packing model illustrating possible contacts (in Å) forged by **R** in (1*R*)-(-)-menthyl acetate@**1c**. Extraneous atoms are hidden for clarity. Guest ellipsoids are shown at 50% probability.

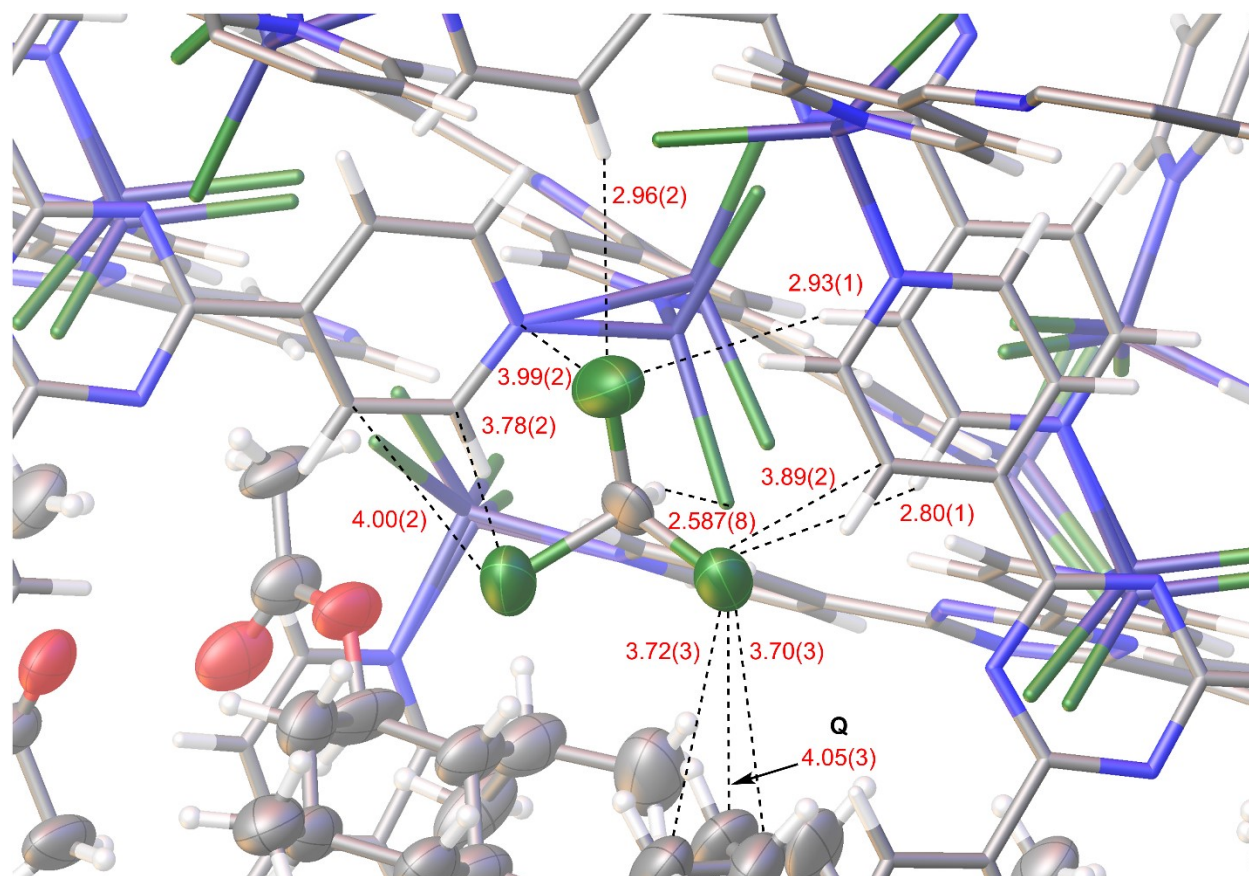

## References

1. O. V. Dolomanov, L. J. Bourhis, R. J. Gildea, J. A. K. Howard and H. Puschmann, *J. Appl. Cryst.*, 2009, **42**, 339.
2. S. J. Clark, M. D. Segall, C. J. Pickard, P. J. Hasnip, M. J. Probert, K. Refson and M. C. Payne, *Z. Kristallogr.*, 2005, **220**, 567.
3. S. Grimme, *J. Comput. Chem.*, 2006, **27**, 1787.
4. J. P. Perdew, K. Burke and M. Ernzerhof, *Phys. Rev. Lett.*, 1996, **77**, 3865.
5. M. C. Payne, M. P. Teter, D. C. Allan, T. A. Aria and J. D. Joannopoulos, *Rev. Mod. Phys.*, 1992, **64**, 1045.
6. D. Vanderbilt, *Phys. Rev. B*, 1990, **41**, 7892.
7. P. Pulay, *Chem. Phys. Lett.*, 1980, **73**, 393.
8. B. G. Pfrommer, M. Côté, S. G. Louie and M. L. Cohen, *J. Comput. Phys.*, 1997, **131**, 233.
9. C. F. Macrae, I. J. Bruno, J. A. Chisholm, P. R. Edgington, P. McCabe, E. Pidcock, L. Rodriguez-Monge, R. Taylor, J. van de Streek and P. A. Wood, *J. Appl. Cryst.*, 2008 **41**, 466.
10. M. J. Turner, J. J. McKinnon, S. K. Wolff, D. J. Grimwood, P. R. Spackman, D. Jayatilaka and M. A. Spackman, CrystalExplorer17 (Version 17.5, Revision f4e298a), University of Western Australia, Perth, WA, 2017.
11. M. A. Spackman and D. Jayatilaka, *CrystEngComm*, 2009, **11**, 19.
